# Supplementary material
Source: publisher figshare collection journal article supplement (https://gsajournals.figshare.com/ndownloader/files/14550869)
Supplement: Supplementary file 1 [file 14550869]

## Sheet: rat-LOP
rat-LOP
Hg19				Rn5				Canfam3				EquCab2				Bostau6
Human_cne	nearest_human_geen	Human_TSS	human_dis	Rat_cne	Rat_chrom	Rat_TSS	Rat_dis	Dog_cne	Dog_chrom	Dog_TSS	Dog_dis	Horse_cne	Horse_chrom	Horse_TSS	Horse_dis	Cow_cne	Cow_chrom	Cow_TSS	Cow_dis
chr16:13792099-13792416	ENSG00000175595	14014014	221598	chr3:98734597-98734911	chr10	-	-	chr6:29437306-29437624	chr6	29226896	210410	chr13:31231200-31231517	chr13	31024646	206554	chr25:12599671-12599989	chr25	12923472	323483
chr4:134634587-134634817	ENSG00000254535	135122903	488086	chr2:152789466-152789696	chr2	150261307	2528159	chr19:8267814-8268044	chr19	7878400	389414	chr2:96615235-96615465	chr2	96242430	372805	chr17:24850425-24850653	chr17	24418677	431748
chr8:20263127-20263529	ENSG00000061337	20161474	101653	chr15:57889687-57890092	chr16	-	-	chr25:36665662-36666067	chr25	36804789	138722	chr2:49489350-49489754	chr2	49368485	120865	chr8:68047988-68048393	chr8	67867782	180206
chr7:114986693-114987156	ENSG00000135272	114562209	424484	chr4:43990957-43991418	chr4	41790494	2200463	chr14:54443651-54444113	chr14	54063568	380083	chr4:72607877-72608340	chr4	72206834	401043	chr4:53400088-53400544	chr4	53854749	454205
chr8:86910233-86910310	ENSG00000147614	86999552	89242	chr2:107651024-107651103	chr5	-	-	chr29:32166392-32166469	chr29	32336499	170030	chr9:2931654-2931730	chr9	2764237	167417	chr14:79146234-79146311	chr14	78964217	182017
chr2:46359894-46360153	ENSG00000116016	46520806	160653	chr6:9837191-9837447	chr6	20299176	10461729	chr10:48415754-48416019	chr10	48550882	134863	chr15:52755745-52756010	chr15	52622187	133558	chr11:28424752-28425011	chr11	28575995	150984
chr15:60126754-60126810	ENSG00000140299	59981733	145021	chr8:80444457-80444513	chr8	76675968	3768489	chr30:24665877-24665933	chr30	24546564	119313	chr1:131921537-131921593	chr1	132022504	100911	chr10:50480659-50480715	chr10	50628360	147645
chr8:36546887-36546956	ENSG00000215262	36641842	94886	chr16:68103409-68103478	chr16	70663273	2559795	chr16:28550627-28550696	chr16	28478384	72243	chr27:8777174-8777243	chr27	8699565	77609	chr27:31786143-31786212	chr27	31849126	62914
chrX:136129524-136129617	ENSG00000147274	135962923	166601	chrX:140376000-140376093	chrX	154518145	14142052	chrX:107320423-107320516	chrX	107182418	138005	chrX:109025721-109025814	chrX	108889708	136013	chrX:20594784-20594877	chrX	20462823	131961
chr4:150316853-150316982	ENSG00000170390	150999426	682444	chr19:46619665-46619795	chr2	-	-	chr15:47517287-47517418	chr15	48119273	601855	chr2:83854702-83854832	chr2	83278289	576413	chr17:8461268-8461397	chr17	7742116	719152
chr2:161761626-161761926	ENSG00000136560	161993419	231493	chr13:86223356-86223657	chr3	-	-	chr36:6523760-6524058	chr36	6769333	245275	chr18:41491813-41492109	chr18	41680812	188703	chr2:35608380-35608681	chr2	35343041	265339
chr3:64190711-64190777	ENSG00000163636	64009658	181053	chr4:188922712-188922777	chr15	-	-	chr20:27036069-27036134	chr20	27206629	170495	chr16:25089779-25089846	chr16	25253011	163165	chr22:37341442-37341517	chr22	37538013	196496
chr7:115175738-115175976	ENSG00000135272	114562209	613529	chr4:44220185-44220421	chr4	41790494	2429691	chr14:54606091-54606327	chr14	54063568	542523	chr4:72781428-72781665	chr4	72206834	574594	chr4:53228487-53228725	chr4	53854749	626024
chr5:51787738-51787930	ENSG00000213949	52083730	295800	chr2:66112083-66112273	chr2	71763917	5651644	chr4:62694372-62694564	chr4	62455624	238748	chr21:19372545-19372737	chr21	19153982	218563	chr20:26569371-26569563	chr20	26293313	276058
chr3:62469389-62469703	ENSG00000153266	62359999	109390	chr15:19649739-19650053	chr15	16854938	2794801	chr20:28593130-28593436	chr20	28704683	111247	chr16:26586307-26586616	chr16	26692919	106303	chr22:38954867-38955182	chr22	39068358	113176
chr8:117630582-117630814	ENSG00000147679	117778742	147928	chr6:116775762-116775992	chr7	-	-	chr13:16074807-16075039	chr13	16213190	138151	chr9:60097512-60097744	chr9	60233194	135450	chr14:49857995-49858228	chr14	49714027	143968
chr18:52956357-52956473	ENSG00000166510	52626739	329618	chr18:64633348-64633463	chr18	67564699	2931236	chr1:20355625-20355740	chr1	20641290	285550	chr8:72958082-72958196	chr8	72654605	303477	chr24:55126024-55126138	chr24	54786447	339577
chr3:64059330-64059387	ENSG00000163636	64009658	49672	chr4:189030709-189030765	chr15	-	-	chr20:27150868-27150925	chr20	27206629	55704	chr16:25197712-25197769	chr16	25253011	55242	chr22:37473164-37473221	chr22	37538013	64792
chr5:106166113-106166192	ENSG00000184349	107006596	840404	chr9:106673542-106673621	chr9	109897850	3224229	chr3:5089773-5089852	chr3	4272185	817588	chr14:64189056-64189135	chr14	63631090	557966	chr7:108380545-108380624	chr7	109097540	716916
chr6:14596146-14596238	ENSG00000112149	14117872	478274	chr17:23043679-23043774	chr17	26364943	3321169	chr35:13913908-13914000	chr35	13489273	424635	chr20:14058696-14059033	chr20	13617586	441110	chr23:41944810-41944902	chr23	42354680	409778
chr5:117352871-117352928	ENSG00000169570	118324240	971312	chr18:43325575-43325632	chr14	-	-	chr11:7581394-7581449	chr11	8346507	765058	chr14:54876102-54876159	chr14	54153274	722828	chr7:37071494-37071551	chr7	36230534	840960
chr3:110575356-110575471	ENSG00000177707	110788918	213447	chr11:60067904-60068019	chr11	62144557	2076538	chr33:15706123-15706239	chr33	15871172	164933	chr19:46529413-46529528	chr19	46336940	192473	chr1:56122455-56122570	chr1	56308185	185615
chr9:83118384-83118913	ENSG00000106829	82186688	931696	chr5:91081079-91081639	chr1	-	-	chr1:78564558-78565091	chr1	79269883	704792	chr23:11521002-11521534	chr23	12316041	794507	chr8:56704734-56705287	chr8	55837380	867354
chr7:42491885-42492079	ENSG00000106571	42277469	214416	chr2:111851666-111851858	chr17	-	-	chr18:7611597-7611790	chr18	7800858	189068	chr4:13563345-13563538	chr4	13366275	197070	chr4:79225052-79225245	chr4	79444274	219029
chr18:54021031-54021190	ENSG00000091157	54318574	297384	chr18:63651064-63651225	chr18	58326472	5324592	chr1:19395970-19396130	chr1	19157893	238077	chr8:73893484-73893644	chr8	74126513	232869	chr24:56203064-56203224	chr24	56467339	264115
chr4:134345945-134346157	ENSG00000138650	134070470	275475	chr2:150894829-150895041	chr2	156481915	5586874	chr19:8496024-8496233	chr19	8732650	236417	chr2:96853106-96853317	chr2	97081807	228490	chr17:25230226-25230428	chr17	25495147	264719
chr12:67406746-67406806	ENSG00000155974	67197966	208780	chr7:62426110-62426173	chr7	64890312	2464139	chr10:9399953-9400015	chr10	9063901	336052	chr6:82367702-82367763	chr6	82051586	316116	chr5:47005563-47005624	chr5	47393104	387480
chr2:59274081-59274276	ENSG00000115392	58468507	805574	chr14:105859294-105859490	chr14	110369224	4509734	chr10:59349122-59349317	chr10	58632368	716754	chr15:41842597-41842792	chr15	42591277	748485	chr11:41644022-41644217	chr11	40744419	899603
chr12:67269326-67269666	ENSG00000155974	67197966	71360	chr7:62571631-62571980	chr7	64890312	2318332	chr10:9256888-9257228	chr10	9063901	192987	chr6:82242755-82243093	chr6	82051586	191169	chr5:47154293-47154636	chr5	47393104	238468
chr2:51752915-51753006	ENSG00000179915	51259674	493241	chr6:27538335-27538437	chr6	25149152	2389183	chr10:53003699-53003791	chr10	52670843	332856	chr15:48152566-48152654	chr15	48567697	415043	chr11:34244181-34244270	chr11	33353304	890877
chr12:67275139-67275213	ENSG00000155974	67197966	77173	chr7:62567767-62567841	chr7	64890312	2322471	chr10:9264211-9264285	chr10	9063901	200310	chr6:82249603-82249677	chr6	82051586	198017	chr5:47146202-47146276	chr5	47393104	246828
chr8:20463363-20463577	ENSG00000061337	20161474	301889	chr15:57688570-57688778	chr16	-	-	chr25:36484930-36485144	chr25	36804789	319645	chr2:49658057-49658266	chr2	49368485	289572	chr8:68276127-68276345	chr8	67867782	408345
chr3:177556319-177556378	ENSG00000197584	177990720	434342	chr2:126385275-126385339	chr2	137954821	11569482	chr34:41209429-41209488	chr34	41963562	754074	chr19:17247316-17247375	chr19	17863925	616550	chr1:89811766-89811825	chr1	89080346	731420
chr18:53863816-53864218	ENSG00000091157	54318574	454356	chr18:63807637-63808036	chr18	58326472	5481165	chr1:19545298-19545696	chr1	19157893	387405	chr8:73741487-73741886	chr8	74126513	384627	chr24:56047735-56048147	chr24	56467339	419192
chr5:109843834-109844039	ENSG00000164209	110073837	229798	chr9:112627441-112627646	chr18	-	-	chr3:1847117-1847321	chr3	1719781	127336	chr14:60998953-60999158	chr14	60895084	103869	chr7:112158424-112158629	chr7	112332867	174238
chr5:51850267-51850323	ENSG00000213949	52083730	233407	chr2:66059128-66059184	chr2	71763917	5704733	chr4:62648891-62648948	chr4	62455624	193267	chr21:19330736-19330792	chr21	19153982	176754	chr20:26514357-26514413	chr20	26293313	221044
chr2:221374396-221374460	ENSG00000124006	220436581	937815	chr9:89877602-89877666	chr9	82469082	7408520	chr37:26867829-26867893	chr37	26079752	788077	chr6:9867265-9867329	chr6	9063215	804050	chr2:109205686-109205751	chr2	108226115	979571
chr9:104585330-104585459	ENSG00000198785	104500862	84468	chr5:72045001-72045129	chr5	69564696	2480305	chr11:58497898-58498024	chr11	58422278	75620	chr25:8130802-8130931	chr25	8054706	76096	chr8:93276839-93276968	chr8	93146121	130718
chr2:67937497-67937620	ENSG00000143971	67624451	313046	chr14:99735433-99735557	chr14	102047669	2312112	chr10:66902210-66902333	chr10	66631403	270807	chr15:34392827-34392950	chr15	34678370	285420	chr11:66144594-66144716	chr11	65813352	331242
chr2:67946242-67946382	ENSG00000143971	67624451	321791	chr14:99743163-99743302	chr14	102047669	2304367	chr10:66910398-66910541	chr10	66631403	278995	chr15:34384984-34385137	chr15	34678370	293233	chr11:66157466-66157609	chr11	65813352	344114
chr8:117636008-117636066	ENSG00000147679	117778742	142676	chr6:116781221-116781277	chr7	-	-	chr13:16087432-16087489	chr13	16213190	125701	chr9:60104692-60104750	chr9	60233194	128444	chr14:49852533-49852591	chr14	49714027	138506
chr5:109813360-109813788	ENSG00000164209	110073837	260049	chr9:112595881-112596307	chr18	-	-	chr3:1870438-1870864	chr3	1719781	150657	chr14:61024742-61025172	chr14	60895084	129658	chr7:112133549-112133978	chr7	112332867	198889
chr2:145960593-145961167	ENSG00000169554	145282147	678446	chr3:39137149-39137734	chr3	35196121	3941028	chr19:47206283-47206875	chr19	46550583	655700	chr18:28090668-28091252	chr18	27461817	628851	chr2:51506538-51507109	chr2	52274862	767753
chr7:114973732-114973852	ENSG00000135272	114562209	411523	chr4:43958055-43958178	chr4	41790494	2167561	chr14:54429146-54429266	chr14	54063568	365578	chr4:72593722-72593842	chr4	72206834	386888	chr4:53417969-53418089	chr4	53854749	436660
chr9:107094859-107095086	ENSG00000186881	107266455	171369	chr5:73407381-73407617	chr5	69134585	4272796	chr11:60318298-60318529	chr11	60467149	148620	chr25:10279357-10279587	chr25	10431380	151793	chr8:95602865-95603095	chr8	95761536	158441
chr6:14286464-14286816	ENSG00000112149	14117872	168592	chr17:22789096-22789434	chr17	26364943	3575509	chr35:13645483-13645835	chr35	13489273	156210	chr20:13771139-13771490	chr20	13617586	153553	chr23:42201152-42201503	chr23	42354680	153177
chr18:54054404-54054717	ENSG00000091157	54318574	263857	chr18:63620940-63621256	chr18	58326472	5294468	chr1:19371397-19371710	chr1	19157893	213504	chr8:73917695-73918008	chr8	74126513	208505	chr24:56228869-56229172	chr24	56467339	238167
chr8:131627098-131627170	ENSG00000153317	131455906	171192	chr7:105147239-105147312	chr7	91990638	13156601	chr13:27618038-27618111	chr13	27430768	187270	chr9:71780268-71780342	chr9	71598463	181805	chr14:11164261-11164334	chr14	11327900	163566
chr11:79390168-79390330	ENSG00000149256	79151992	238176	chr1:159798328-159798485	chr1	167398961	7600476	chr21:19267340-19267502	chr21	19502511	235009	chr7:64980822-64980984	chr7	65193196	212212	chr29:16378220-16378382	chr29	16642421	264039
chr2:220781535-220781931	ENSG00000124006	220436581	344954	chr9:89296234-89296629	chr9	82469082	6827152	chr37:26362267-26362663	chr37	26079752	282515	chr6:9341850-9342243	chr6	9063215	278635	chr2:108554023-108554419	chr2	108226115	327908
chr17:30054006-30054204	ENSG00000172301	30186356	132152	chr10:64473863-64474056	chr16	-	-	chr9:41203095-41203294	chr9	41102890	100205	chr11:40693107-40693303	chr11	40600927	92180	chr19:18714968-18715167	chr19	18604845	110123
chr2:220816032-220816196	ENSG00000124006	220436581	379451	chr9:89331484-89331652	chr9	82469082	6862402	chr37:26389118-26389286	chr37	26079752	309366	chr6:9366951-9367119	chr6	9063215	303736	chr2:108593126-108593294	chr2	108226115	367011
chr8:20325351-20325449	ENSG00000061337	20161474	163877	chr15:57810843-57810941	chr16	-	-	chr25:36601079-36601176	chr25	36804789	203613	chr2:49545864-49545961	chr2	49368485	177379	chr8:68130507-68130603	chr8	67867782	262725
chr5:117355185-117355443	ENSG00000169570	118324240	968797	chr18:43327936-43328193	chr14	-	-	chr11:7583587-7583844	chr11	8346507	762663	chr14:54873616-54873873	chr14	54153274	720342	chr7:37067562-37067814	chr7	36230534	837028
chrX:76230202-76230431	ENSG00000196468	76709648	479217	chrX:77147439-77147665	chrX	55910572	21236867	chrX:59449347-59449576	chrX	59739397	289821	chrX:57209889-57210118	chrX	57443444	233326	chrX:80263823-80264049	chrX	79954814	309009
chr6:14291689-14291846	ENSG00000112149	14117872	173817	chr17:22801757-22801911	chr17	26364943	3563032	chr35:13649945-13650106	chr35	13489273	160672	chr20:13775856-13776014	chr20	13617586	158270	chr23:42196750-42196912	chr23	42354680	157768
chr5:51712250-51712463	ENSG00000213949	52083730	371267	chr2:66184674-66184901	chr2	71763917	5579016	chr4:62763688-62763901	chr4	62455624	308064	chr21:19438225-19438438	chr21	19153982	284243	chr20:26667298-26667511	chr20	26293313	373985
chr5:106131875-106131992	ENSG00000184349	107006596	874604	chr9:106709474-106709587	chr9	109897850	3188263	chr3:5119287-5119404	chr3	4272185	847102	chr14:64223743-64223864	chr14	63631090	592653	chr7:108346966-108347083	chr7	109097540	750457
chr14:25283593-25283674	ENSG00000100453	25103473	180120	chr6:74673106-74673187	chr15	-	-	chr8:4643146-4643226	chr8	4511736	131410	chr1:163322490-163322571	chr1	162752547	569943	chr21:35416864-35416945	chr21	35267943	148921
chr17:60143453-60143514	ENSG00000108510	60142643	810	chr10:76423105-76423166	chr10	73685854	2737251	chr9:34638608-34638669	chr9	34641617	2948	chr11:34119274-34119335	chr11	34122135	2800	chr19:11286419-11286480	chr19	11288867	2387
chr15:68756199-68756249	ENSG00000137809	68724501	31698	chr8:71085938-71085988	chr8	67299007	3786931	chr30:32466634-32466684	chr30	32405661	60973	chr1:124418466-124418515	chr1	124447421	28906	chr10:15277377-15277427	chr10	15236778	40599
chr7:113015063-113015497	ENSG00000164604	112727833	287230	chr4:40224412-40224845	chr4	43719803	3494958	chr14:52823549-52823983	chr14	52573892	249657	chr4:71005644-71006078	chr4	70763801	241843	chr4:55379427-55379893	chr4	55640695	260802
chr9:31873917-31874014	ENSG00000122729	32384618	510604	chr5:58819596-58819691	chr5	60972012	2152321	chr11:49364286-49364383	chr11	49722549	358166	chr23:48741834-48741930	chr23	49059728	317798	chr8:11992001-11992096	chr8	11543046	448955
chr18:53999566-53999869	ENSG00000091157	54318574	318705	chr18:63679387-63679689	chr18	58326472	5352915	chr1:19418816-19419118	chr1	19157893	260923	chr8:73869302-73869605	chr8	74126513	256908	chr24:56182520-56182823	chr24	56467339	284516
chr11:79643993-79644194	ENSG00000149256	79151992	492001	chr1:159568041-159568242	chr1	167398961	7830719	chr21:19051582-19051783	chr21	19502511	450728	chr7:64766532-64766733	chr7	65193196	426463	chr29:16103656-16103857	chr29	16642421	538564
chr5:98704513-98704670	ENSG00000153922	98262240	442273	chr9:101415861-101416018	chr1	-	-	chr3:10929607-10929762	chr3	11288970	359208	chr14:70127801-70127958	chr14	70498333	370375	chr7:101078752-101078908	chr7	100565742	513010
chr14:25179886-25180023	ENSG00000100453	25103473	76413	chr6:74520086-74520223	chr15	-	-	chr8:4565891-4566027	chr8	4511736	54155	chr1:163235844-163235976	chr1	162752547	483297	chr21:35331736-35331867	chr21	35267943	63793
chr3:19785780-19786090	ENSG00000163576	19988517	202427	chr16:66049917-66050221	chr9	-	-	chr23:23490046-23490354	chr23	23338240	151806	chr16:62360612-62360920	chr16	62228509	132103	chr1:44543391-44543696	chr1	44712296	168600
chr6:14467889-14468194	ENSG00000112149	14117872	350017	chr17:22941122-22941422	chr17	26364943	3423521	chr35:13803253-13803554	chr35	13489273	313980	chr20:13936324-13936624	chr20	13617586	318738	chr23:42056090-42056389	chr23	42354680	298291
chr3:184398250-184398628	ENSG00000177383	184429836	31208	chr11:86511895-86512267	chr1	-	-	chr34:17520820-17521201	chr34	17544950	23749	chr19:23008834-23009214	chr19	23030761	21547	chr1:83114026-83114411	chr1	83090425	23601
chr12:100161718-100161800	ENSG00000180219	100041531	120187	chr7:30837618-30837699	chr13	-	-	chr15:38981918-38982000	chr15	38890120	91798	chr28:24001490-24001572	chr28	23899793	101697	chr5:64200999-64201080	chr5	64094901	106098
chr2:84218034-84218140	ENSG00000163541	84687169	469029	chr4:168837435-168837542	chr4	165937928	2899507	chr17:40740471-40740580	chr17	40393146	347325	chr15:20227431-20227539	chr15	19834367	393064	chr11:50970505-50970612	chr11	50400444	570061
chr1:222413776-222413927	ENSG00000143512	222721445	307518	chr13:106698053-106698207	chr13	101018647	5679406	chr38:16604208-16604359	chr38	16818334	213975	chr30:12127126-12127278	chr30	12368988	241710	chr16:26483001-26483162	chr16	26741134	257972
chr12:99547229-99547293	ENSG00000180219	100041531	494238	chr7:31361174-31361252	chr13	-	-	chr15:38498838-38498901	chr15	38890120	391219	chr28:23515746-23515810	chr28	23899793	383983	chr5:63657261-63657325	chr5	64094901	437576
chr9:7456304-7456629	ENSG00000178445	6645650	810654	chr5:95644811-95645131	chr1	-	-	chr11:28325234-28325560	chr11	27584474	740760	chr23:28507555-28507879	chr23	27814482	693073	chr8:37618539-37618866	chr8	38468512	849646
chr16:51077256-51077571	ENSG00000103449	51185278	107707	chr19:30082679-30082998	chr19	34379537	4296539	chr2:64341522-64342032	chr2	64245467	96055	chr3:3896701-3897018	chr3	3978895	81877	chr18:19548394-19548711	chr18	19653740	105029
chr8:20676821-20677071	ENSG00000061337	20161474	515347	chr15:57368247-57368508	chr16	-	-	chr25:36291145-36291395	chr25	36804789	513394	chr2:49885626-49885876	chr2	49368485	517141	chr8:68542737-68542988	chr8	67867782	674955
chr16:51866143-51866575	ENSG00000103449	51185278	680865	chr19:29860081-29860510	chr19	34379537	4519027	chr2:63645378-63645813	chr2	64244559	598746	chr3:4574719-4575150	chr3	3987210	587509	chr18:20386576-20387004	chr18	19654593	731983
chr2:145914897-145915049	ENSG00000169554	145282147	632750	chr3:39096501-39096653	chr3	35196121	3900380	chr19:47165173-47165325	chr19	46550583	614590	chr18:28048766-28048918	chr18	27461817	586949	chr2:51556998-51557150	chr2	52274862	717712
chr2:17358454-17358567	ENSG00000214842	17699706	341139	chr6:44302124-44302237	chr6	46895070	2592833	chr17:12703922-12704035	chr17	12998855	294820	chr15:77570786-77570899	chr15	77292419	278367	chr11:81493535-81493648	chr11	81239874	253661
chr2:221770688-221770989	ENSG00000116106	222438922	667933	chr9:90274867-90275177	chr9	83022498	7252369	chr37:27201809-27202121	chr37	27805314	603193	chr6:10200663-10200965	chr6	10795190	594225	chr2:109645427-109645730	chr2	110405363	759633
chr2:222499928-222499982	ENSG00000116106	222438922	61006	chr2:183381294-183381348	chr9	-	-	chr37:27865485-27865538	chr37	27809644	55841	chr6:10847940-10847994	chr6	10797060	50880	chr2:110477325-110477379	chr2	110407327	69998
chr4:150201020-150201243	ENSG00000170390	150999426	798183	chr19:46504631-46504850	chr2	-	-	chr15:47421399-47421625	chr15	48119273	697648	chr2:83953992-83954218	chr2	83278289	675703	chr17:8589652-8589874	chr17	7742116	847536
chr5:98421671-98421860	ENSG00000153922	98262240	159431	chr9:101014186-101014374	chr1	-	-	chr3:11163721-11163910	chr3	11288970	125060	chr14:70375562-70375751	chr14	70498333	122582	chr7:100741335-100741523	chr7	100565742	175593
chr18:30090475-30090669	ENSG00000141441	30050447	40028	chr18:12127352-12127547	chr18	14769099	2641552	chr7:57191363-57191557	chr7	57295067	103510	chr8:53278315-53278509	chr8	53246251	32064	chr24:24961913-24962101	chr24	25005192	43091
chr1:166243007-166243134	ENSG00000188859	166136206	106801	chr13:89906269-89906396	chr13	101283804	11377408	chr38:17231706-17231827	chr38	17292326	60499	chr5:31464241-31464366	chr5	31607112	142746	chr3:2698498-2698624	chr3	2774510	75886
chr2:221375367-221375675	ENSG00000124006	220436581	938786	chr9:89878606-89878914	chr9	82469082	7409524	chr37:26868811-26869124	chr37	26079752	789059	chr6:9868232-9868541	chr6	9063215	805017	chr2:109206650-109206955	chr2	108226115	980535
chr9:23375800-23375866	ENSG00000107105	23826335	450469	chrX:109398969-109399035	chr5	-	-	chr11:42241251-42241317	chr11	42571280	329963	chr23:42009371-42009437	chr23	42344615	335178	chr8:20817708-20817774	chr8	20318445	499263
chr5:52571651-52571718	ENSG00000164172	52405893	165758	chr2:65835649-65835716	chr2	71520173	5684457	chr4:62021073-62021140	chr4	62154814	133674	chr21:18778436-18778503	chr21	18877720	99217	chr20:25818798-25818865	chr20	25965174	146309
chr2:220990301-220990551	ENSG00000124006	220436581	553720	chr9:89517870-89518119	chr9	82469082	7048788	chr37:26545765-26546015	chr37	26079752	466013	chr6:9531077-9531327	chr6	9063215	467862	chr2:108779090-108779340	chr2	108226115	552975
chr2:220729017-220729326	ENSG00000124006	220436581	292436	chr9:89239140-89239444	chr9	82469082	6770058	chr37:26318629-26318938	chr37	26079752	238877	chr6:9297943-9298252	chr6	9063215	234728	chr2:108500511-108500819	chr2	108226115	274396
chr1:42274158-42274398	ENSG00000127129	41950344	323814	chr5:145964439-145964679	chr5	142891220	3073219	chr15:1366748-1366987	chr15	1647965	280978	chr2:16500966-16501205	chr2	16793577	292372	chr3:104978335-104978574	chr3	105299334	320760
chr3:153646911-153647003	ENSG00000114790	153838792	191789	chr2:171994526-171994618	chr2	46226740	125767786	chr23:48130755-48130847	chr23	48290113	159266	chr16:85839317-85839409	chr16	85972751	133342	chr1:114637009-114637101	chr1	114432073	204936
chr8:60176317-60176727	ENSG00000198846	60031767	144550	chr7:68428662-68429054	chr5	-	-	chr29:9971060-9971471	chr29	9841835	129225	chr9:24910197-24910608	chr9	25191271	280663	chr14:27030854-27031265	chr14	26941849	89005
chr2:46392955-46393384	ENSG00000116016	46520806	127422	chr6:9862832-9863248	chr6	20299176	10435928	chr10:48442862-48443294	chr10	48550882	107588	chr15:52727936-52728363	chr15	52622187	105749	chr11:28452521-28452945	chr11	28575995	123050
chr16:73384129-73384235	ENSG00000140836	73093597	290532	chr19:51550186-51550292	chr19	53739472	2189180	chr5:78941389-78941495	chr5	78610027	331362	chr3:20752753-20752859	chr3	21001311	248452	chr18:37986241-37986347	chr18	38186022	199675
chr18:54074894-54075406	ENSG00000091157	54318574	243168	chr18:63600824-63601337	chr18	58326472	5274352	chr1:19352756-19353272	chr1	19157893	194863	chr8:73935762-73936277	chr8	74126513	190236	chr24:56251280-56251788	chr24	56467339	215551
chr9:22852953-22853092	ENSG00000176399	22446840	406113	chr5:114314137-114314275	chr5	112243551	2070586	chr11:41850547-41850686	chr11	41566167	284380	chr23:41616478-41616617	chr23	41325540	290938	chr8:21389866-21390004	chr8	21768203	378199
chr7:113007200-113007695	ENSG00000164604	112727833	279367	chr4:40215127-40215618	chr4	43719803	3504185	chr14:52820010-52820500	chr14	52573892	246118	chr4:71000301-71001055	chr4	70763801	236500	chr4:55386968-55387448	chr4	55640695	253247
chr15:68798341-68798392	ENSG00000137809	68724501	73840	chr8:71117391-71117442	chr8	67299007	3818384	chr30:32498240-32498290	chr30	32405661	92579	chr1:124385547-124385598	chr1	124447421	61823	chr10:15320427-15320477	chr10	15236778	83649
chr2:138204659-138204756	ENSG00000150540	138721590	516834	chr13:51772454-51772551	chr3	-	-	chr19:40121585-40121682	chr19	40656232	534550	chr18:21078690-21078787	chr18	21516160	437373	chr2:60013405-60013502	chr2	59417441	595964
chr12:99546314-99546420	ENSG00000180219	100041531	495111	chr7:31362000-31362112	chr13	-	-	chr15:38497905-38498012	chr15	38890120	392108	chr28:23514872-23514978	chr28	23899793	384815	chr5:63656387-63656491	chr5	64094901	438410
chr3:177639116-177639327	ENSG00000197584	177990720	351393	chr2:126318231-126318438	chr2	137954821	11636383	chr34:41258137-41258347	chr34	41963562	705215	chr19:17300166-17300376	chr19	17863925	563549	chr1:89733287-89733503	chr1	89080346	652941
chr18:53870323-53870427	ENSG00000091157	54318574	448147	chr18:63800699-63800799	chr18	58326472	5474227	chr1:19538617-19538721	chr1	19157893	380724	chr8:73748154-73748258	chr8	74126513	378255	chr24:56054894-56054999	chr24	56467339	412340
chr5:98469690-98469830	ENSG00000153922	98262240	207450	chr9:101067109-101067248	chr1	-	-	chr3:11109099-11109242	chr3	11288970	179728	chr14:70321906-70322047	chr14	70498333	176286	chr7:100816408-100816548	chr7	100565742	250666
chr5:35471080-35471157	ENSG00000152582	35617946	146789	chr2:84862866-84862943	chr2	78179170	6683696	chr4:72944826-72944900	chr4	72864208	80618	chr21:29728355-29728432	chr21	29631672	96683	chr20:38727093-38727169	chr20	38606774	120319
chr3:62517463-62517630	ENSG00000153266	62359999	157464	chr15:19607327-19607497	chr15	16854938	2752389	chr20:28546688-28546855	chr20	28704683	157828	chr16:26539434-26539597	chr16	26692919	153322	chr22:38907490-38907662	chr22	39068358	160696
chr3:62447787-62448304	ENSG00000153266	62359999	87788	chr15:19671748-19672268	chr15	16854938	2816810	chr20:28614775-28615296	chr20	28704683	89387	chr16:26608517-26609037	chr16	26692919	83882	chr22:38978437-38978957	chr22	39068358	89401
chr14:25229788-25230007	ENSG00000100453	25103473	126315	chr6:74601822-74602034	chr15	-	-	chr8:4601997-4602213	chr8	4511736	90261	chr1:163273545-163273764	chr1	162752547	520998	chr21:35362738-35362958	chr21	35267943	94795
chr2:138482654-138482964	ENSG00000150540	138721590	238626	chr13:52035727-52036037	chr3	-	-	chr19:40390442-40390752	chr19	40656232	265480	chr18:21317235-21317545	chr18	21516160	198615	chr2:59677892-59678196	chr2	59417441	260451
chr2:46313782-46313943	ENSG00000116016	46520806	206863	chr6:9791310-9791469	chr6	20299176	10507707	chr10:48378359-48378521	chr10	48550882	172361	chr15:52792459-52792617	chr15	52622187	170272	chr11:28385332-28385514	chr11	28575995	190481
chr16:73559511-73560523	ENSG00000140836	73093597	465914	chr19:51203248-51204260	chr19	53739472	2535212	chr5:79097521-79098512	chr5	78610027	487494	chr3:20595567-20596574	chr3	21001311	404737	chr18:37831727-37832735	chr18	38186022	353287
chr7:113094111-113094267	ENSG00000164604	112727833	366278	chr4:40326276-40326437	chr4	43719803	3393366	chr14:52884846-52885006	chr14	52573892	310954	chr4:71065772-71065928	chr4	70763801	301971	chr4:55259371-55259527	chr4	55640695	381168
chr2:59813667-59813965	ENSG00000119866	60780702	966737	chr14:105358528-105358822	chr14	108548256	3189434	chr10:59813474-59813775	chr10	60689285	875510	chr15:41389557-41389858	chr15	40536640	852917	chr11:42190214-42190518	chr11	43174031	983513
chr9:104765864-104766173	ENSG00000198785	104500862	265002	chr5:71790633-71790930	chr5	69564696	2225937	chr11:58661762-58662081	chr11	58422278	239484	chr25:8276877-8277189	chr25	8054706	222171	chr8:93483676-93483985	chr8	93146121	337555
chr8:36296730-36296878	ENSG00000215262	36641842	344964	chr16:67801739-67801886	chr16	70663273	2861387	chr16:28759579-28759727	chr16	28478384	281195	chr27:8975286-8975434	chr27	8699565	275721	chr27:31558586-31558739	chr27	31849126	290387
chr5:98830756-98831031	ENSG00000153922	98262240	568516	chr9:101872010-101872282	chr1	-	-	chr3:10633619-10633891	chr3	11288970	655079	chr14:69816575-69816847	chr14	70498333	681486	chr7:101431386-101431658	chr7	100565742	865644
chr9:7324893-7325156	ENSG00000178445	6645650	679243	chr5:95388290-95388547	chr1	-	-	chr11:28214932-28215193	chr11	27584474	630458	chr23:28402317-28402581	chr23	27814482	587835	chr8:37810277-37810541	chr8	38468512	657971
chr14:52134225-52134286	ENSG00000186469	52292913	158627	chr6:102745762-102745826	chr15	-	-	chr8:27928506-27928572	chr8	28080980	152408	chr1:185230755-185230821	chr1	185375753	144932	chr10:44543421-44543482	chr10	44711672	168190
chr4:134238247-134238492	ENSG00000138650	134070470	167777	chr2:151003531-151003767	chr2	156481915	5478148	chr19:8591609-8591851	chr19	8732650	140799	chr2:96937883-96938128	chr2	97081807	143679	chr17:25322627-25322873	chr17	25495147	172274
chr3:110473183-110473302	ENSG00000177707	110788918	315616	chr11:59982274-59982393	chr11	62144557	2162164	chr33:15632034-15632154	chr33	15871172	239018	chr19:46606632-46606750	chr19	46336940	269692	chr1:56017832-56017951	chr1	56308185	290234
chr13:61267605-61267914	ENSG00000083544	60970591	297014	chr14:76394084-76394398	chr15	-	-	chr22:16560052-16560365	chr22	16343861	216191	chr17:36035115-36035428	chr17	35816575	218540	chr12:1345470-1345773	chr12	1685262	339489
chr2:145837293-145837531	ENSG00000169554	145282147	555146	chr3:39004339-39004573	chr3	35196121	3808218	chr19:47080894-47081126	chr19	46550583	530311	chr18:27969150-27969382	chr18	27461817	507333	chr2:51656645-51656883	chr2	52274862	617979
chr22:33720466-33720543	ENSG00000185666	33454358	266108	chr19:23633822-23633898	chr7	-	-	chr10:30352496-30352573	chr10	30510937	158364	chr28:31364007-31364084	chr28	31164574	199433	chr5:72202131-72202208	chr5	71926810	275321
chr4:45089088-45089148	ENSG00000163281	44728612	360476	chr14:40666163-40666224	chr14	62736435	22070211	chr13:41497408-41497472	chr13	41228560	268848	chr3:83257267-83257328	chr3	83528289	270961	chr6:65329773-65329834	chr6	64992219	337554
chr4:150811331-150811444	ENSG00000170390	150999426	187982	chr19:47601155-47601276	chr2	-	-	chr15:47943463-47943582	chr15	48119273	175691	chr2:83428157-83428274	chr2	83278289	149868	chr17:7946519-7946635	chr17	7742116	204403
chr6:14639847-14639964	ENSG00000112149	14117872	521975	chr17:23094248-23094364	chr17	26364943	3270579	chr35:13957029-13957149	chr35	13489273	467756	chr20:14103755-14103870	chr20	13617586	486169	chr23:41900919-41901041	chr23	42354680	453639
chr22:31496052-31496149	ENSG00000185133	31518717	22568	chr14:80301814-80301911	chr14	84430035	4128124	chr26:24103825-24103920	chr26	24118132	14212	chr8:5918457-5918554	chr8	5904112	14345	chr17:72059891-72059988	chr17	72076028	16040
chr5:103767663-103767972	ENSG00000112874	102898494	869169	chr9:108852320-108852629	chr9	105294901	3557419	chr3:6953353-6953662	chr3	7697470	743808	chr14:66052374-66052683	chr14	66749358	696675	chr7:106003037-106003346	chr7	105045004	958033
chr3:90084904-90085290	ENSG00000044524	89156674	928230	chr13:1514940-1515327	chr11	-	-	chr33:1467455-1467843	chr33	785725	681730	chr26:861614-861999	chr26	1656872	794873	chr1:37613572-37613958	chr1	36715182	898390
chr18:54020622-54021006	ENSG00000091157	54318574	297568	chr18:63651250-63651648	chr18	58326472	5324778	chr1:19396155-19396545	chr1	19157893	238262	chr8:73893071-73893459	chr8	74126513	233054	chr24:56202651-56203039	chr24	56467339	264300
chr13:61280067-61280233	ENSG00000083544	60970591	309476	chr14:76421287-76421455	chr15	-	-	chr22:16570633-16570800	chr22	16343861	226772	chr17:36046499-36046666	chr17	35816575	229924	chr12:1336490-1336655	chr12	1685262	348607
chr5:51744578-51744735	ENSG00000213949	52083730	338995	chr2:66157566-66157723	chr2	71763917	5606194	chr4:62733495-62733650	chr4	62455624	277871	chr21:19413172-19413329	chr21	19153982	259190	chr20:26622120-26622277	chr20	26293313	328807
chr15:68756910-68757068	ENSG00000137809	68724501	32409	chr8:71086543-71086700	chr8	67299007	3787536	chr30:32467568-32467725	chr30	32405661	61907	chr1:124417635-124417793	chr1	124447421	29628	chr10:15278076-15278234	chr10	15236778	41298
chr2:221655559-221655697	ENSG00000116106	222438922	783225	chr9:90157173-90157311	chr9	83022498	7134675	chr37:27102708-27102845	chr37	27805314	702469	chr6:10094776-10094914	chr6	10795190	700276	chr2:109520936-109521073	chr2	110405363	884290
chr2:54494819-54495120	ENSG00000178021	54483409	11410	chr14:114593219-114593513	chr20	-	-	chr10:55191386-55191686	chr10	55185147	6239	chr15:45935183-45935483	chr15	45944748	9265	chr11:36818198-36818498	chr11	36809243	8955
chr16:56081751-56081811	ENSG00000159398	55989943	91808	chr19:11789624-11789690	chr19	23219489	11429799	chr2:60111381-60111441	chr2	60164386	52945	chr3:8504647-8504707	chr3	8447588	57059	chr18:24644710-24644768	chr18	24711578	66810
chr7:157698120-157698371	ENSG00000105993	157128075	570045	chr6:153798789-153799041	chr4	-	-	chr16:20153282-20153531	chr16	19806346	346936	chr4:108087919-108088169	chr4	107640852	447067	chr4:119763077-119763327	chr4	119431677	331400
chr2:145863219-145863690	ENSG00000169554	145282147	581072	chr3:39028496-39029045	chr3	35196121	3832375	chr19:47103353-47103823	chr19	46550583	552770	chr18:27990363-27990833	chr18	27461817	528546	chr2:51626855-51627325	chr2	52274862	647537
chr7:112886857-112887023	ENSG00000164604	112727833	159024	chr4:40048736-40048901	chr4	43719803	3670902	chr14:52734076-52734242	chr14	52573892	160184	chr4:70914627-70914792	chr4	70763801	150826	chr4:55483003-55483169	chr4	55640695	157526
chr9:7510336-7510843	ENSG00000178445	6645650	864686	chr5:95775655-95776168	chr1	-	-	chr11:28375545-28376052	chr11	27584474	791071	chr23:28553481-28553990	chr23	27814482	738999	chr8:37574275-37574804	chr8	38468512	893708
chr2:220969130-220969212	ENSG00000124006	220436581	532549	chr9:89498190-89498268	chr9	82469082	7029108	chr37:26527251-26527333	chr37	26079752	447499	chr6:9510513-9510595	chr6	9063215	447298	chr2:108755819-108755901	chr2	108226115	529704
chr2:221154012-221154168	ENSG00000124006	220436581	717431	chr9:89671863-89672018	chr9	82469082	7202781	chr37:26687507-26687663	chr37	26079752	607755	chr6:9680125-9680279	chr6	9063215	616910	chr2:108971207-108971363	chr2	108226115	745092
chr2:221981240-221981309	ENSG00000116106	222438922	457613	chr9:90467632-90467701	chr9	83022498	7445134	chr37:27391618-27391687	chr37	27805314	413627	chr6:10386218-10386287	chr6	10795190	408903	chr2:109903877-109903945	chr2	110405363	501418
chr8:67292780-67292909	ENSG00000179041	67341263	48354	chr2:124348170-124348299	chr5	-	-	chr29:15985500-15985628	chr29	16016154	30526	chr9:18868824-18868952	chr9	18816620	52204	chr14:32668145-32668273	chr14	32699359	31086
chr2:221171985-221172449	ENSG00000124006	220436581	735404	chr9:89693042-89693503	chr9	82469082	7223960	chr37:26704169-26704640	chr37	26079752	624417	chr6:9697227-9697696	chr6	9063215	634012	chr2:108991319-108991778	chr2	108226115	765204
chr5:50916906-50917130	ENSG00000016082	50678921	237985	chr2:69696005-69696235	chr2	66884387	2811618	chr4:63414876-63415102	chr4	63648648	233546	chr21:20065117-20065341	chr21	20306385	241044	chr20:27459142-27459377	chr20	27755504	296127
chr6:14313023-14313304	ENSG00000112149	14117872	195151	chr17:22814544-22814824	chr17	26364943	3550119	chr35:13663204-13663485	chr35	13489273	173931	chr20:13788742-13789020	chr20	13617586	171156	chr23:42181910-42182192	chr23	42354680	172488
chrX:76192730-76193049	ENSG00000196468	76709648	516599	chrX:77130351-77130682	chrX	55910572	21219779	chrX:59424264-59424583	chrX	59739397	314814	chrX:57192043-57192366	chrX	57443444	251078	chrX:80284749-80285069	chrX	79954814	329935
chr2:221711888-221712037	ENSG00000116106	222438922	726885	chr9:90209756-90209905	chr9	83022498	7187258	chr37:27150137-27150286	chr37	27805314	655028	chr6:10150455-10150603	chr6	10795190	644587	chr2:109575206-109575360	chr2	110405363	830003
chr1:81478074-81478389	ENSG00000117114	81771845	293456	chr2:273537862-273538173	chr2	277602151	4063978	chr6:66468025-66468341	chr6	66216074	251951	chr5:82327859-82328174	chr5	81707657	620202	chr3:63664539-63664853	chr3	63355165	309374
chr5:117865715-117865805	ENSG00000169570	118324240	458435	chr18:43042519-43042609	chr14	-	-	chr11:8019805-8019895	chr11	8346507	326612	chr14:54461723-54461813	chr14	54153274	308449	chr7:36560594-36560685	chr7	36230534	330060
chr5:109698127-109698506	ENSG00000164209	110073837	375331	chr9:112466380-112466767	chr18	-	-	chr3:2012554-2012944	chr3	1719781	292773	chr14:61137375-61137765	chr14	60895084	242291	chr7:111972364-111972753	chr7	112332867	360114
chr13:23363592-23363648	ENSG00000102683	23755091	391443	chr15:43350685-43350741	chr15	45385876	2035135	chr25:15687805-15687861	chr25	15403190	284615	chr17:3445375-3445431	chr17	3857467	412036	chr12:35020454-35020509	chr12	34954970	65484
chr5:157953577-157953633	ENSG00000164330	158526769	573136	chr10:30161318-30161374	chr10	23523689	6637629	chr4:51911527-51911590	chr4	51378963	532564	chr14:20922910-20922966	chr14	20400279	522631	chr7:72216242-72216298	chr7	72804182	587884
chr12:65907922-65908036	ENSG00000174099	65672423	235499	chr7:65750744-65750857	chr7	62954845	2795899	chr10:8091273-8091387	chr10	7911920	179353	chr6:81145043-81145157	chr6	80995064	149979	chr5:48498033-48498147	chr5	48702835	204688
chr8:36100249-36100404	ENSG00000215262	36641842	541438	chr16:67565545-67565700	chr16	70663273	3097573	chr16:28911110-28911265	chr16	28478384	432726	chr27:9127629-9127785	chr27	8699565	428064	chr27:31415960-31416115	chr27	31849126	433011
chr1:81510205-81510817	ENSG00000117114	81771845	261028	chr2:273508366-273508971	chr2	277602151	4093180	chr6:66441312-66441923	chr6	66216074	225238	chr5:82301101-82301711	chr5	81707657	593444	chr3:63620883-63621494	chr3	63355165	265718
chr5:109713792-109713887	ENSG00000164209	110073837	359950	chr9:112480265-112480360	chr18	-	-	chr3:1992192-1992287	chr3	1719781	272411	chr14:61125418-61125512	chr14	60895084	230334	chr7:111989708-111989803	chr7	112332867	343064
chr4:150525747-150526013	ENSG00000170390	150999426	473413	chr19:46860598-46860863	chr2	-	-	chr15:47715474-47715739	chr15	48119273	403534	chr2:83659065-83659334	chr2	83278289	380776	chr17:8236773-8237039	chr17	7742116	494657
chr5:157924352-157924817	ENSG00000164330	158526769	601952	chr10:30184836-30185336	chr10	23523689	6661147	chr4:51937230-51937710	chr4	51378963	558267	chr14:20949135-20949593	chr14	20400279	548856	chr7:72190797-72191252	chr7	72804182	612930
chr2:59824001-59824269	ENSG00000119866	60780702	956433	chr14:105348262-105348530	chr14	108548256	3199726	chr10:59824267-59824535	chr10	60689285	864750	chr15:41379497-41379765	chr15	40536640	842857	chr11:42202929-42203207	chr11	43174031	970824
chr2:220782872-220783001	ENSG00000124006	220436581	346291	chr9:89297669-89297798	chr9	82469082	6828587	chr37:26363950-26364080	chr37	26079752	284198	chr6:9343094-9343223	chr6	9063215	279879	chr2:108556018-108556147	chr2	108226115	329903
chr2:221736020-221736204	ENSG00000116106	222438922	702718	chr9:90233170-90233349	chr9	83022498	7210672	chr37:27168367-27168550	chr37	27805314	636764	chr6:10169972-10170156	chr6	10795190	625034	chr2:109606194-109606377	chr2	110405363	798986
chr10:87218241-87218302	ENSG00000199104	88024545	806243	chr16:12828450-12828511	chr16	9574932	3253518	chr4:33410539-33410601	chr4	34073429	662828	chr1:84799939-84800001	chr1	84117509	682430	chr28:40594979-40595042	chr28	41329149	734107
chr5:106197480-106197649	ENSG00000184349	107006596	808947	chr9:106636479-106636643	chr9	109897850	3261207	chr3:5051982-5052151	chr3	4272185	779797	chr14:64165167-64165336	chr14	63631090	534077	chr7:108315290-108315459	chr7	109097540	782081
chr2:15959823-15960213	ENSG00000134323	16080686	120473	chr6:47018105-47018495	chr6	51353994	4335499	chr17:11634896-11635295	chr17	11718464	83169	chr15:78675329-78675716	chr15	78588928	86401	chr11:82613525-82613913	chr11	82695073	81160
chr2:17114706-17114980	ENSG00000197872	16847599	267107	chr6:44500196-44500469	chr6	50682247	6181778	chr17:12499225-12499499	chr17	12237822	261403	chr15:77772174-77772448	chr15	78023686	251238	chr11:81719033-81719312	chr11	81934105	214793
chr2:138163007-138163057	ENSG00000150540	138721590	558533	chr13:51738284-51738334	chr3	-	-	chr19:40085242-40085292	chr19	40656232	570940	chr18:21030480-21030529	chr18	21516160	485631	chr2:60112113-60112163	chr2	59417441	694672
chrX:22970010-22970116	ENSG00000184735	23018087	47971	chrX:42184448-42184551	chr8	-	-	chrX:18727325-18727430	chrX	18776371	48941	chrX:17305983-17306088	chrX	17345722	39634	chrX:127429386-127429492	chrX	127364927	64459
chr6:135043684-135043787	ENSG00000118514	135271260	227473	chr1:26122115-26122218	chr1	18065413	8056702	chr1:27538624-27538727	chr1	27694895	156168	chr10:80570674-80570777	chr10	80753675	182898	chr9:73794524-73794627	chr9	74002359	207732
chrX:23002919-23003000	ENSG00000184735	23018087	15087	chrX:42273955-42274036	chr8	-	-	chrX:18765218-18765299	chrX	18776371	11072	chrX:17339533-17339613	chrX	17345722	6109	chrX:127379537-127379618	chrX	127364927	14610
chr6:135142538-135142803	ENSG00000118514	135271260	128457	chr1:26196243-26196513	chr1	18065413	8130830	chr1:27607977-27608247	chr1	27694895	86648	chr10:80644580-80644849	chr10	80753675	108826	chr9:73885787-73886055	chr9	74002359	116304
chr5:98711071-98711230	ENSG00000153922	98262240	448831	chr9:101421895-101422052	chr1	-	-	chr3:10916987-10917146	chr3	11288970	371824	chr14:70123862-70124021	chr14	70498333	374312	chr7:101086046-101086201	chr7	100565742	520304
chr11:79721903-79722257	ENSG00000149256	79151992	569911	chr1:159483058-159483411	chr1	167398961	7915550	chr21:18966247-18966610	chr21	19502511	535901	chr7:64693969-64694327	chr7	65193196	498869	chr29:16004051-16004406	chr29	16642421	638015
chr7:157634644-157634729	ENSG00000105993	157128075	506569	chr6:153834836-153834921	chr4	-	-	chr16:20109371-20109454	chr16	19806346	303025	chr4:108032109-108032194	chr4	107640852	391257	chr4:119727355-119727439	chr4	119431677	295678
chr9:83063586-83063743	ENSG00000106829	82186688	876898	chr5:91016721-91016873	chr1	-	-	chr1:78524898-78525051	chr1	79269883	744832	chr23:11568166-11568323	chr23	12316041	747718	chr8:56644969-56645126	chr8	55837380	807589
chr3:153513958-153514063	ENSG00000114790	153838792	324729	chr2:171842840-171842944	chr2	46226740	125616100	chr23:48027679-48027784	chr23	48290113	262329	chr16:85744880-85744985	chr16	85972751	227766	chr1:114752496-114752601	chr1	114432073	320423
chr5:50784747-50784865	ENSG00000016082	50678921	105826	chr2:69842630-69842747	chr2	66884387	2958243	chr4:63532600-63532718	chr4	63648648	115930	chr21:20195547-20195665	chr21	20306385	110720	chr20:27615853-27615970	chr20	27755504	139534
chr5:117780823-117781008	ENSG00000169570	118324240	543232	chr18:42933146-42933329	chr14	-	-	chr11:7948051-7948236	chr11	8346507	398271	chr14:54533669-54533854	chr14	54153274	380395	chr7:36641450-36641635	chr7	36230534	410916
chr18:58430068-58430188	ENSG00000166603	58040001	390067	chr13:28887648-28887769	chr18	-	-	chr1:15880052-15880174	chr1	16131567	251393	chr8:77448433-77448555	chr8	77171048	277385	chr24:59905957-59906074	chr24	59672094	233863
chr9:103547244-103547298	ENSG00000170681	103340361	206883	chr5:72848544-72848598	chr5	68926894	3921650	chr11:57592919-57592971	chr11	57453536	139383	chr25:7198981-7199035	chr25	7054711	144270	chr8:92110815-92110869	chr8	91916199	194616
chr7:115129486-115130021	ENSG00000135272	114562209	567277	chr4:44149806-44150341	chr4	41790494	2359312	chr14:54569544-54570078	chr14	54063568	505976	chr4:72747086-72747621	chr4	72206834	540252	chr4:53263342-53263878	chr4	53854749	590871
chr2:112195505-112195638	ENSG00000153094	111876955	318550	chr3:129102581-129102721	chr3	126604489	2498092	chr17:35938988-35939121	chr17	35619812	319176	chr15:14537094-14537226	chr15	14233147	303947	chr11:870853-870988	chr11	1199790	328802
chr6:114496927-114497002	ENSG00000196591	114332472	164455	chr20:42142968-42143471	chr20	44827687	2684216	chr12:70244879-70244976	chr12	70072758	172121	chr10:63147911-63147985	chr10	62976771	171140	chr9:36719982-36720057	chr9	36918295	198238
chr18:54184993-54185060	ENSG00000091157	54318574	133514	chr18:63504493-63504560	chr18	58326472	5178021	chr1:19260775-19260843	chr1	19157893	102882	chr8:74020119-74020186	chr8	74126513	106327	chr24:56354731-56354798	chr24	56467339	112541
chr1:81489017-81489355	ENSG00000117114	81771845	282490	chr2:273529597-273529947	chr2	277602151	4072204	chr6:66460412-66460763	chr6	66216074	244338	chr5:82320425-82320776	chr5	81707657	612768	chr3:63653275-63653627	chr3	63355165	298110
chr7:115029426-115029535	ENSG00000135272	114562209	467217	chr4:44027792-44027901	chr4	41790494	2237298	chr14:54478055-54478166	chr14	54063568	414487	chr4:72640106-72640215	chr4	72206834	433272	chr4:53366950-53367059	chr4	53854749	487690
chr5:117802864-117803062	ENSG00000169570	118324240	521178	chr18:42965331-42965528	chr14	-	-	chr11:7967659-7967855	chr11	8346507	378652	chr14:54513790-54513987	chr14	54153274	360516	chr7:36619909-36620106	chr7	36230534	389375
chr9:107180981-107181175	ENSG00000186881	107266455	85280	chr5:73491404-73491595	chr5	69134585	4356819	chr11:60411445-60411647	chr11	60467149	55502	chr25:10357069-10357267	chr25	10431380	74113	chr8:95672683-95672877	chr8	95761536	88659
chr12:32491507-32491572	ENSG00000139132	32552463	60891	chr4:248246243-248246308	chr11	-	-	chr27:16513017-16513082	chr27	16373506	139511	chr6:56355292-56355357	chr6	56489117	133760	chr5:77888961-77889026	chr5	77740438	148523
chr16:73673221-73673321	ENSG00000140836	73093597	579624	chr19:51101691-51101791	chr19	53739472	2637681	chr5:79199056-79199156	chr5	78610027	589029	chr3:20495835-20495935	chr3	21001311	505376	chr18:37726542-37726642	chr18	38186022	459380
chr13:103542003-103542079	ENSG00000134897	103451399	90604	chr16:89982707-89982783	chr9	-	-	chr22:52384457-52384533	chr22	52316530	67927	chr17:71440927-71441003	chr17	71360665	80262	chr12:83107799-83107876	chr12	83016461	91338
chr2:145846380-145846560	ENSG00000169554	145282147	564233	chr3:39013706-39013885	chr3	35196121	3817585	chr19:47088340-47088521	chr19	46550583	537757	chr18:27976289-27976468	chr18	27461817	514472	chr2:51647214-51647392	chr2	52274862	627470
chr7:42519671-42519733	ENSG00000106571	42277469	242202	chr17:53966052-53966113	chr17	50629477	3336575	chr18:7585343-7585406	chr18	7800858	215452	chr4:13591479-13591542	chr4	13366275	225204	chr4:79191230-79191293	chr4	79444274	252981
chr16:51056612-51056828	ENSG00000103449	51185278	128450	chr19:30098488-30098713	chr19	34379537	4280824	chr2:64360184-64360400	chr2	64245467	114717	chr3:3879671-3879888	chr3	3978895	99007	chr18:19526896-19527109	chr18	19653740	126631
chr14:54690586-54691080	ENSG00000100526	54863567	172487	chr15:24969402-24969899	chr15	27496685	2526786	chr8:30212217-30212707	chr8	30344957	132250	chr24:2598327-2598817	chr24	2726900	128083	chr10:67013339-67013828	chr10	67155090	141262
chr18:54052756-54052873	ENSG00000091157	54318574	265701	chr18:63623465-63623580	chr18	58326472	5296993	chr1:19372916-19373214	chr1	19157893	215023	chr8:73916357-73916474	chr8	74126513	210039	chr24:56226503-56226616	chr24	56467339	240723
chrX:23039204-23039306	ENSG00000184735	23018087	21117	chrX:42321891-42321992	chr8	-	-	chrX:18794786-18794888	chrX	18776371	18415	chrX:17363729-17363831	chrX	17345727	18002	chrX:127311026-127311128	chrX	127364927	53799
chr16:73696358-73696965	ENSG00000140836	73093597	602761	chr19:51080697-51081304	chr19	53739472	2658168	chr5:79221812-79222426	chr5	78610027	611785	chr3:20476232-20476829	chr3	21001311	524482	chr18:37702367-37702977	chr18	38186022	483045
chr9:83119052-83119115	ENSG00000106829	82186688	932364	chr5:91081788-91081852	chr1	-	-	chr1:78565229-78565292	chr1	79269883	704591	chr23:11520800-11520863	chr23	12316041	795178	chr8:56705425-56705488	chr8	55837380	868045
chr8:36533769-36533953	ENSG00000215262	36641842	107889	chr16:68079669-68079853	chr16	70663273	2583420	chr16:28567395-28567579	chr16	28478384	89011	chr27:8788836-8789020	chr27	8699565	89271	chr27:31766797-31766980	chr27	31849126	82146
chr12:65923112-65923272	ENSG00000174099	65672423	250689	chr7:65731360-65731525	chr7	62954845	2776515	chr10:8106129-8106291	chr10	7911920	194209	chr6:81158908-81159070	chr6	80995064	163844	chr5:48480354-48480512	chr5	48702835	222323
chr8:20697554-20697886	ENSG00000061337	20161474	536080	chr15:57346321-57346653	chr16	-	-	chr25:36269500-36269834	chr25	36804789	534955	chr2:49902298-49902627	chr2	49368485	533813	chr8:68568884-68569216	chr8	67867782	701102
chr6:163791637-163791738	ENSG00000112531	163835032	43294	chr1:49224704-49224804	chr1	52104730	2879926	chr1:51763693-51763794	chr1	51799714	35920	chr31:4735345-4735446	chr31	4808499	73053	chr9:100237463-100237564	chr9	100370771	133207
chr18:52764887-52765488	ENSG00000166510	52626739	138148	chr18:64812495-64813089	chr18	67564699	2751610	chr1:20518333-20518939	chr1	20641290	122351	chr8:72789089-72789684	chr8	72654605	134484	chr24:54935024-54935624	chr24	54786447	148577
chr2:161600653-161600858	ENSG00000153250	161350305	250348	chr13:86364540-86364758	chr3	-	-	chr36:6411935-6412140	chr36	6071325	340610	chr18:41347510-41347716	chr18	41142299	205211	chr2:35725422-35725625	chr2	35960054	234429
chr4:150741473-150741723	ENSG00000170390	150999426	257703	chr19:47525944-47526195	chr2	-	-	chr15:47889238-47889491	chr15	48119273	229782	chr2:83485734-83485987	chr2	83278289	207445	chr17:8017275-8017524	chr17	7742116	275159
chr2:161821922-161822102	ENSG00000136560	161993419	171317	chr13:86157400-86157584	chr3	-	-	chr36:6581512-6581689	chr36	6769333	187644	chr18:41542985-41543162	chr18	41680812	137650	chr2:35520674-35520851	chr2	35343041	177633
chr2:221345505-221345603	ENSG00000124006	220436581	908924	chr9:89848125-89848220	chr9	82469082	7379043	chr37:26839882-26839981	chr37	26079752	760130	chr6:9839985-9840082	chr6	9063215	776770	chr2:109174475-109174572	chr2	108226115	948360
chr6:114421467-114421947	ENSG00000196591	114332472	88995	chr20:42237494-42237980	chr20	44827687	2589707	chr12:70178375-70178856	chr12	70072758	105617	chr10:63076119-63076598	chr10	62976771	99348	chr9:36806546-36807024	chr9	36918295	111271
chr18:30129009-30129062	ENSG00000141441	30050447	78562	chr18:12185241-12185293	chr18	14769099	2583806	chr7:57160009-57160061	chr7	57295067	135006	chr8:53319240-53319293	chr8	53246251	72989	chr24:24914162-24914215	chr24	25005192	90977
chr2:161667069-161667141	ENSG00000153250	161350305	316764	chr13:86315357-86315431	chr3	-	-	chr36:6440157-6440230	chr36	6071325	368832	chr18:41386928-41387001	chr18	41142299	244629	chr2:35698476-35698549	chr2	35960054	261505
chr2:184087040-184087133	ENSG00000163002	183982241	104799	chr4:21952529-21952621	chr3	-	-	chr36:26211874-26211966	chr36	26137763	74111	chr18:60742264-60742357	chr18	60647621	94643	chr2:13391078-13391171	chr2	13487161	95990
chr3:184360414-184360564	ENSG00000177383	184429836	69272	chr11:86543031-86543178	chr1	-	-	chr34:17489936-17490094	chr34	17544950	54856	chr19:22978840-22978990	chr19	23030761	51771	chr1:83145897-83146047	chr1	83090425	55472
chr2:15937661-15937794	ENSG00000134323	16080686	142892	chr6:47048444-47048596	chr6	51353994	4305398	chr17:11610979-11611115	chr17	11718464	107349	chr15:78700004-78700136	chr15	78588928	111076	chr11:82643923-82644058	chr11	82695073	51015
chr2:145817468-145817877	ENSG00000169554	145282147	535321	chr3:38986541-38986954	chr3	35196121	3790420	chr19:47061249-47061667	chr19	46550583	510666	chr18:27949682-27950094	chr18	27461817	487865	chr2:51682849-51683260	chr2	52274862	591602
chr3:177726412-177726480	ENSG00000197584	177990720	264240	chr2:126180400-126180468	chr2	137954821	11774353	chr34:41326049-41326117	chr34	41963562	637445	chr19:17397325-17397393	chr19	17863925	466532	chr1:89602628-89602696	chr1	89080346	522282
chr6:14514418-14514490	ENSG00000112149	14117872	396546	chr17:22971271-22971343	chr17	26364943	3393600	chr35:13838028-13838100	chr35	13489273	348755	chr20:13974543-13974615	chr20	13617586	356957	chr23:42016635-42016706	chr23	42354680	337974
chr9:106505182-106505418	ENSG00000136824	106856541	351123	chr5:69960173-69960407	chr5	73151949	3191542	chr11:59816539-59816775	chr11	60091674	274899	chr25:9745413-9745648	chr25	10059214	313566	chr8:94980920-94981152	chr8	95362953	381801
chr3:184435196-184435565	ENSG00000177383	184429836	5360	chr11:86482616-86482978	chr1	-	-	chr34:17550091-17550460	chr34	17544950	5141	chr19:23035749-23036118	chr19	23030761	4988	chr1:83083464-83083836	chr1	83090389	6553
chr9:82997174-82997453	ENSG00000106829	82186688	810486	chr5:90944491-90944761	chr1	-	-	chr1:78469340-78469619	chr1	79269883	800264	chr23:11628447-11628726	chr23	12316041	687315	chr8:56580169-56580450	chr8	55837380	742789
chr8:64212015-64212170	ENSG00000185728	64081112	130903	chr3:133581579-133581730	chr2	-	-	chr29:13365962-13366117	chr29	13240349	125613	chr9:21490712-21490867	chr9	21612894	122027	chr14:29918687-29918841	chr14	29830727	87960
chr4:130887591-130887649	ENSG00000151466	130014764	872827	chr2:153322887-153322944	chr2	148271696	5051191	chr19:11174566-11174624	chr19	12001306	826682	chr2:99433854-99433912	chr2	100183877	749965	chr17:28130060-28130118	chr17	29126352	996234
chr5:109722322-109722424	ENSG00000164209	110073837	351413	chr9:112490169-112490271	chr18	-	-	chr3:1987883-1987985	chr3	1719781	268102	chr14:61120459-61120561	chr14	60895084	225375	chr7:112001396-112001498	chr7	112332867	331369
chr2:221205453-221205807	ENSG00000124006	220436581	768872	chr9:89724354-89724707	chr9	82469082	7255272	chr37:26726915-26727271	chr37	26079752	647163	chr6:9721749-9722104	chr6	9063215	658534	chr2:109026534-109026888	chr2	108226115	800419
chr16:51047186-51047340	ENSG00000103449	51185278	137938	chr19:30105584-30105740	chr19	34379537	4273797	chr2:64369769-64369923	chr2	64245467	124302	chr3:3872397-3872551	chr3	3978895	106344	chr18:19518115-19518269	chr18	19653740	135471
chr1:166255560-166255704	ENSG00000188859	166136206	119354	chr13:89895979-89896123	chr13	101283804	11387681	chr38:17224176-17224320	chr38	17292326	68006	chr5:31455798-31455942	chr5	31607112	151170	chr3:2687370-2687539	chr3	2774510	86971
chr11:79741144-79741235	ENSG00000149256	79151992	589152	chr1:159464342-159464433	chr1	167398961	7934528	chr21:18951235-18951326	chr21	19502511	551185	chr7:64678530-64678621	chr7	65193196	514575	chr29:15985137-15985228	chr29	16642421	657193
chr6:14505893-14506028	ENSG00000112149	14117872	388021	chr17:22968860-22968996	chr17	26364943	3395947	chr35:13830620-13830749	chr35	13489273	341347	chr20:13965773-13965908	chr20	13617586	348187	chr23:42028193-42028328	chr23	42354680	326352
chr5:157910562-157910686	ENSG00000164330	158526769	616083	chr10:30212671-30212801	chr10	23523689	6688982	chr4:51952162-51952289	chr4	51378963	573199	chr14:20964072-20964198	chr14	20400279	563793	chr7:72174264-72174391	chr7	72804182	629791
chr2:220989482-220989903	ENSG00000124006	220436581	552901	chr9:89517078-89517492	chr9	82469082	7047996	chr37:26544265-26544691	chr37	26079752	464513	chr6:9530245-9530671	chr6	9063215	467030	chr2:108778271-108778699	chr2	108226115	552156
chr16:73446470-73446609	ENSG00000140836	73093597	352873	chr19:51606909-51607048	chr19	53739472	2132424	chr5:78997139-78997277	chr5	78610027	387112	chr3:20695931-20696071	chr3	21001311	305240	chr18:37931889-37932029	chr18	38186022	253993
chr3:90089721-90089935	ENSG00000044524	89156674	933047	chr13:1502218-1502430	chr11	-	-	chr33:1471645-1471858	chr33	785725	685920	chr26:855717-855928	chr26	1656872	800944	chr1:37621426-37621639	chr1	36715182	906244
chr9:104010715-104010812	ENSG00000136881	104145801	134989	chr5:72376869-72376966	chr5	69268710	3108159	chr11:58010116-58010213	chr11	58109368	99155	chr25:7599261-7599358	chr25	7704932	105574	chr8:92599759-92599855	chr8	92724710	124855
chr2:220657143-220657494	ENSG00000124006	220436581	220562	chr9:89166544-89166896	chr9	82469082	6697462	chr37:26271585-26271936	chr37	26079752	191833	chr6:9246987-9247337	chr6	9063215	183772	chr2:108437077-108437430	chr2	108226115	210962
chrX:76235057-76235108	ENSG00000196468	76709648	474540	chrX:77151728-77151777	chrX	55910572	21241156	chrX:59453997-59454048	chrX	59739397	285349	chrX:57214445-57214496	chrX	57443444	228948	chrX:80259007-80259057	chrX	79954814	304193
chr16:14094975-14095065	ENSG00000186260	14165178	70113	chr10:11737609-11737699	chr14	-	-	chr6:29165538-29165628	chr6	29098228	67310	chr13:30969729-30969819	chr13	30911132	58597	chr25:13001053-13001142	chr25	13072436	71294
chr5:117702365-117702421	ENSG00000169570	118324240	621819	chr18:42851879-42851935	chr14	-	-	chr11:7882840-7882894	chr11	8346507	463613	chr14:54589309-54589365	chr14	54153274	436035	chr7:36716375-36716431	chr7	36230534	485841
chr2:221954922-221955128	ENSG00000116106	222438922	483794	chr9:90439447-90439661	chr9	83022498	7416949	chr37:27365907-27366116	chr37	27805314	439198	chr6:10361031-10361238	chr6	10795190	433952	chr2:109875073-109875283	chr2	110405363	530080
chr3:110473354-110473438	ENSG00000177707	110788918	315480	chr11:59982462-59982551	chr11	62144557	2162006	chr33:15632219-15632309	chr33	15871172	238863	chr19:46606480-46606567	chr19	46336940	269540	chr1:56018016-56018106	chr1	56308185	290079
chr13:23274944-23275163	ENSG00000102683	23755091	479928	chr15:43285361-43285580	chr15	45385876	2100296	chr25:15755827-15756046	chr25	15403190	352637	chr17:3361158-3361376	chr17	3857467	496091	chr12:35079491-35079708	chr12	34954970	124521
chr3:147944899-147945138	ENSG00000144891	148415571	470433	chr8:97382686-97382924	chr2	-	-	chr23:43204246-43204482	chr23	43613937	409455	chr16:81178038-81178277	chr16	81548815	370538	chr1:120947611-120947853	chr1	120445395	502216
chr7:42661178-42661445	ENSG00000136197	42951904	290459	chr17:53765719-53765985	chr17	50782041	2983678	chr18:7454316-7454582	chr18	7233303	221013	chr4:13702849-13703116	chr4	13919887	216771	chr4:79066273-79066540	chr4	78839309	226964
chr3:62489154-62489508	ENSG00000153266	62359999	129155	chr15:19632844-19633207	chr15	16854938	2777906	chr20:28575205-28575559	chr20	28704683	129124	chr16:26568137-26568494	chr16	26692919	124425	chr22:38937307-38937669	chr22	39068358	130689
chr16:14107472-14107674	ENSG00000186260	14165178	57504	chr10:11748400-11748596	chr14	-	-	chr6:29153491-29153692	chr6	29098228	55263	chr13:30959577-30959779	chr13	30911132	48445	chr25:13015122-13015323	chr25	13072436	57113
chr18:54044618-54044800	ENSG00000091157	54318574	273774	chr18:63632442-63632620	chr18	58326472	5305970	chr1:19379166-19379348	chr1	19157893	221273	chr8:73910191-73910373	chr8	74126513	216140	chr24:56219569-56219751	chr24	56467339	247588
chr5:51027913-51028381	ENSG00000016082	50678921	348992	chr2:69590846-69591313	chr2	66884387	2706459	chr4:63320746-63321216	chr4	63648648	327432	chr21:19968086-19968556	chr21	20306385	337829	chr20:27341080-27341546	chr20	27755504	413958
chr14:82260436-82260504	ENSG00000071537	82000205	260231	chr6:122814548-122814616	chr6	124868197	2053581	chr8:54047025-54047093	chr8	53824395	222630	chr24:26506943-26507011	chr24	26268415	238528	chr10:94276696-94276765	chr10	93965154	311542
chr2:67952686-67953379	ENSG00000143971	67624451	328235	chr14:99746773-99747462	chr14	102047669	2300207	chr10:66914243-66914941	chr10	66631403	282840	chr15:34380521-34381214	chr15	34678370	297156	chr11:66167079-66167772	chr11	65813352	353727
chr5:109697787-109697854	ENSG00000164209	110073837	375983	chr9:112466031-112466098	chr18	-	-	chr3:2012192-2012259	chr3	1719781	292411	chr14:61138040-61138107	chr14	60895084	242956	chr7:111972026-111972093	chr7	112332867	360774
chr3:177122913-177123248	ENSG00000177565	176915261	207652	chr2:129061113-129061473	chr2	127025374	2035739	chr34:40870646-40870983	chr34	40612783	257863	chr19:16886566-16886900	chr19	16734808	151758	chr1:90262193-90262529	chr1	90428231	165702
chr2:140098056-140098150	ENSG00000144227	139537918	560138	chr3:29141565-29141656	chr3	68828	29072737	chr19:41900524-41900617	chr19	41318893	581631	chr18:22762770-22762864	chr18	22271482	491288	chr2:57964643-57964737	chr2	58582460	617723
chr5:117340937-117341018	ENSG00000169570	118324240	983222	chr18:43316974-43317055	chr14	-	-	chr11:7569173-7569254	chr11	8346507	777253	chr14:54886046-54886127	chr14	54153274	732772	chr7:37086478-37086556	chr7	36230534	855944
chr7:115046263-115046556	ENSG00000135272	114562209	484054	chr4:44044964-44045274	chr4	41790494	2254470	chr14:54492452-54492762	chr14	54063568	428884	chr4:72654934-72655244	chr4	72206834	448100	chr4:53352113-53352422	chr4	53854749	502327
chr4:150249401-150249755	ENSG00000170390	150999426	749671	chr19:46566851-46567206	chr2	-	-	chr15:47468829-47469178	chr15	48119273	650095	chr2:83901099-83901453	chr2	83278289	622810	chr17:8527526-8527878	chr17	7742116	785410
chr18:58678116-58678284	ENSG00000101542	59000815	322531	chr17:5823493-5823661	chr13	-	-	chr1:15658562-15658730	chr1	15234880	423682	chr8:77667583-77667751	chr8	77933225	265474	chr24:60107426-60107594	chr24	60532272	424678
chr2:146061154-146061495	ENSG00000169554	145282147	779007	chr3:39326030-39326385	chr3	35196121	4129909	chr19:47325884-47326276	chr19	46550583	775301	chr18:28185834-28186176	chr18	27461817	724017	chr2:51328485-51328828	chr2	52274862	946034
chr18:52912236-52912338	ENSG00000166510	52626739	285497	chr18:64676153-64676255	chr18	67564699	2888444	chr1:20400571-20400672	chr1	20641290	240618	chr8:72914748-72914850	chr8	72654605	260143	chr24:55073994-55074096	chr24	54786447	287547
chr2:221795966-221796127	ENSG00000116106	222438922	642795	chr9:90293340-90293501	chr9	83022498	7270842	chr37:27221838-27221999	chr37	27805314	583315	chr6:10220098-10220259	chr6	10795190	574931	chr2:109673603-109673767	chr2	110405363	731596
chr4:150225540-150225776	ENSG00000170390	150999426	773650	chr19:46528616-46528851	chr2	-	-	chr15:47453452-47453688	chr15	48119273	665585	chr2:83919838-83920074	chr2	83278289	641549	chr17:8547727-8547963	chr17	7742116	805611
chr6:135201757-135201843	ENSG00000118514	135271260	69417	chr1:26246000-26246084	chr1	18065413	8180587	chr1:27649584-27649670	chr1	27694895	45225	chr10:80696098-80696182	chr10	80753675	57493	chr9:73946969-73947053	chr9	74002359	55306
chr3:147813864-147814069	ENSG00000144891	148415571	601502	chr8:97550649-97550851	chr2	-	-	chr23:43105860-43106068	chr23	43613937	507869	chr16:81074677-81074884	chr16	81548815	473931	chr1:121123606-121123818	chr1	120445395	678211
chr16:73388622-73389239	ENSG00000140836	73093597	295025	chr19:51554110-51554742	chr19	53739472	2184730	chr5:78945613-78946233	chr5	78610027	335586	chr3:20748091-20748709	chr3	21001311	252602	chr18:37981425-37982044	chr18	38186022	203978
chr2:59192754-59193078	ENSG00000115392	58468507	724247	chr14:105934439-105934758	chr14	110369224	4434466	chr10:59274673-59274995	chr10	58632368	642305	chr15:41917990-41918313	chr15	42591277	672964	chr11:41533488-41533811	chr11	40744419	789069
chr13:76772220-76772422	ENSG00000136153	76194570	577650	chr15:90217517-90217719	chr15	87900117	2317400	chr22:29919973-29920175	chr22	29519369	400604	chr17:49183235-49183437	chr17	48815013	368222	chr12:51552997-51553192	chr12	51141637	411360
chr2:221962424-221962490	ENSG00000116106	222438922	476432	chr9:90445019-90445085	chr9	83022498	7422521	chr37:27371028-27371092	chr37	27805314	434222	chr6:10365823-10365887	chr6	10795190	429303	chr2:109880836-109880902	chr2	110405363	524461
chr9:13852794-13852863	ENSG00000147862	14398982	546119	chr3:50084798-50084868	chr5	-	-	chr11:34350100-34350169	chr11	34674076	323907	chr23:34043768-34043837	chr23	34332092	288255	chr8:30443427-30443496	chr8	30010800	432627
chrX:76194700-76194962	ENSG00000196468	76709648	514686	chrX:77132011-77132272	chrX	55910572	21221439	chrX:59426166-59426434	chrX	59739397	312963	chrX:57193961-57194222	chrX	57443444	249222	chrX:80282915-80283177	chrX	79954814	328101
chrX:76618859-76619414	ENSG00000196468	76709648	90234	chrX:77439777-77440332	chrX	55910572	21529205	chrX:59654342-59654898	chrX	59739397	84499	chrX:57381224-57381780	chrX	57443444	61664	chrX:80037275-80037831	chrX	79954814	82461
chr2:67877275-67878637	ENSG00000143971	67624451	252824	chr14:99661967-99663370	chr14	102047669	2384299	chr10:66842768-66844185	chr10	66631403	211365	chr15:34455276-34456673	chr15	34678370	221697	chr11:66069693-66071093	chr11	65813352	256341
chr16:16575282-16575393	ENSG00000091262	16317379	257903	chr1:192007003-192007110	chr1	103096453	88910550	chr6:27641633-27641744	chr6	27800215	158471	chr13:29480018-29480129	chr13	29615990	135861	chr25:14820623-14820734	chr25	14643302	177321
chr3:177712590-177712941	ENSG00000197584	177990720	277779	chr2:126200517-126200866	chr2	137954821	11753955	chr34:41314413-41314762	chr34	41963562	648800	chr19:17383375-17383725	chr19	17863925	480200	chr1:89625213-89625561	chr1	89080346	544867
chr8:60172338-60172414	ENSG00000198846	60031767	140571	chr7:68433921-68433995	chr5	-	-	chr29:9967217-9967292	chr29	9841835	125382	chr9:24914246-24914323	chr9	25191271	276948	chr14:27026292-27026368	chr14	26941849	84443
chr2:220842097-220842276	ENSG00000124006	220436581	405516	chr9:89354173-89354350	chr9	82469082	6885091	chr37:26410297-26410476	chr37	26079752	330545	chr6:9397093-9397272	chr6	9063215	333878	chr2:108617309-108617488	chr2	108226115	391194
chr20:34796430-34796493	ENSG00000131043	34824381	27888	chr3:161745126-161745190	chr3	159067374	2677752	chr24:25026231-25026293	chr24	25053254	26961	chr22:26794246-26794308	chr22	26819176	24868	chr13:65992220-65992282	chr13	66018050	25768
chr8:20739017-20739098	ENSG00000061337	20161474	577543	chr15:57280110-57280191	chr16	-	-	chr25:36230971-36231054	chr25	36804789	573735	chr2:49942579-49942662	chr2	49368485	574094	chr8:68619511-68619595	chr8	67867782	751729
chr9:109338687-109338771	ENSG00000148143	109625378	286607	chr5:78047400-78047484	chr5	75809671	2237729	chr11:62156565-62156648	chr11	62401696	245048	chr25:12416269-12416353	chr25	12656077	239724	chr8:97952607-97952691	chr8	98274178	321487
chr5:102085489-102085793	ENSG00000145730	102089685	3892	chr9:104723100-104723408	chr9	110737325	6013917	chr3:8420873-8421171	chr3	8290489	130384	chr14:67477893-67478196	chr14	67474600	3293	chr7:104169777-104170137	chr7	104175550	5413
chr18:52719939-52720108	ENSG00000166510	52626739	93200	chr18:64855978-64856210	chr18	67564699	2708489	chr1:20561666-20561834	chr1	20641290	79456	chr8:72746049-72746218	chr8	72654605	91444	chr24:54881714-54881877	chr24	54786447	95267
chr16:73352340-73352411	ENSG00000140836	73093597	258743	chr19:51520477-51520548	chr19	53739472	2218924	chr5:78910143-78910214	chr5	78610027	300116	chr3:20782809-20782881	chr3	21001311	218430	chr18:38018141-38018212	chr18	38186022	167810
chr2:221084776-221085000	ENSG00000124006	220436581	648195	chr9:89603487-89603710	chr9	82469082	7134405	chr37:26625324-26625549	chr37	26079752	545572	chr6:9611025-9611249	chr6	9063215	547810	chr2:108887613-108887837	chr2	108226115	661498
chr6:14464591-14464735	ENSG00000112149	14117872	346719	chr17:22937990-22938134	chr17	26364943	3426809	chr35:13800365-13800508	chr35	13489273	311092	chr20:13933032-13933176	chr20	13617586	315446	chr23:42058408-42058552	chr23	42354680	296128
chr9:106567224-106567447	ENSG00000136824	106856541	289094	chr5:69865269-69865493	chr5	73151949	3286456	chr11:59855941-59856162	chr11	60091674	235512	chr25:9792022-9792246	chr25	10059214	266968	chr8:95037999-95038224	chr8	95362953	324729
chr11:79385748-79385894	ENSG00000149256	79151992	233756	chr1:159811383-159811558	chr1	167398961	7587403	chr21:19271760-19271906	chr21	19502511	230605	chr7:64984757-64984903	chr7	65193196	208293	chr29:16384165-16384311	chr29	16642421	258110
chr13:103567600-103567715	ENSG00000134897	103451399	116201	chr16:89946983-89947094	chr9	-	-	chr22:52411722-52411838	chr22	52316530	95192	chr17:71471427-71471538	chr17	71360665	110762	chr12:83138158-83138273	chr12	83016461	121697
chr18:54067440-54067930	ENSG00000091157	54318574	250644	chr18:63607490-63607980	chr18	58326472	5281018	chr1:19359681-19360169	chr1	19157893	201788	chr8:73928869-73929359	chr8	74126513	197154	chr24:56242320-56242811	chr24	56467339	224528
chr3:110472596-110472735	ENSG00000177707	110788918	316183	chr11:59981715-59981850	chr11	62144557	2162707	chr33:15631452-15631587	chr33	15871172	239585	chr19:46607202-46607338	chr19	46336940	270262	chr1:56017250-56017386	chr1	56308185	290799
chr2:145897396-145897484	ENSG00000169554	145282147	615249	chr3:39079254-39079342	chr3	35196121	3883133	chr19:47145874-47145960	chr19	46550583	595291	chr18:28032762-28032850	chr18	27461817	570945	chr2:51583098-51583186	chr2	52274862	691676
chr5:117844632-117844879	ENSG00000169570	118324240	479361	chr18:43012379-43012627	chr14	-	-	chr11:8003474-8003728	chr11	8346507	342779	chr14:54483033-54483282	chr14	54153274	329759	chr7:36580837-36581079	chr7	36230534	350303
chr6:135056371-135056425	ENSG00000118514	135271260	214835	chr1:26132742-26132796	chr1	18065413	8067329	chr1:27548952-27549004	chr1	27694895	145891	chr10:80581268-80581322	chr10	80753675	172353	chr9:73813049-73813103	chr9	74002359	189256
chr5:102690981-102691177	ENSG00000181751	102594403	96578	chr9:105050362-105050702	chr9	110878884	5828182	chr3:7886827-7887036	chr3	7967907	80871	chr14:66946018-66946222	chr14	67030817	84595	chr7:104808880-104809094	chr7	104692816	116064
chr14:54686390-54686632	ENSG00000100526	54863567	176935	chr15:24962971-24963203	chr15	27496685	2533482	chr8:30207873-30208116	chr8	30344957	136841	chr24:2594162-2594404	chr24	2726900	132496	chr10:67009127-67009369	chr10	67155090	145721
chr12:65935720-65936260	ENSG00000174099	65672423	263297	chr7:65718738-65719265	chr7	62954845	2763893	chr10:8118418-8118954	chr10	7911920	206498	chr6:81170194-81170728	chr6	80995064	175130	chr5:48463960-48464495	chr5	48702835	238340
chr14:54644475-54645054	ENSG00000100526	54863567	218513	chr15:24925265-24925838	chr15	27496685	2570847	chr8:30172417-30172997	chr8	30344957	171960	chr24:2561192-2561771	chr24	2726900	165129	chr10:66963746-66964326	chr10	67155090	190764
chr2:59808422-59808801	ENSG00000119866	60780702	971901	chr14:105364589-105364973	chr14	108548256	3183283	chr10:59807188-59807565	chr10	60689285	881720	chr15:41397584-41397959	chr15	40536640	860944	chr11:42181720-42182099	chr11	43174031	991932
chr5:50960276-50961444	ENSG00000016082	50678921	281355	chr2:69648931-69650098	chr2	66884387	2764544	chr4:63374800-63375965	chr4	63648648	272683	chr21:20023946-20025110	chr21	20306385	281275	chr20:27410097-27411263	chr20	27755504	344241
chr2:112195866-112196101	ENSG00000153094	111876955	318911	chr3:129102135-129102362	chr3	126604489	2497646	chr17:35939344-35939580	chr17	35619812	319532	chr15:14537452-14537687	chr15	14233147	304305	chr11:870395-870627	chr11	1199790	329163
chr16:56076907-56077165	ENSG00000159398	55989943	86964	chr19:11794292-11794540	chr19	23219489	11424949	chr2:60115246-60115501	chr2	60164386	48885	chr3:8500261-8500519	chr3	8447588	52673	chr18:24650900-24651156	chr18	24711578	60422
chr4:134356100-134356619	ENSG00000138650	134070470	285630	chr2:150885081-150885600	chr2	156481915	5596315	chr19:8486966-8487487	chr19	8732650	245163	chr2:96843205-96843726	chr2	97081807	238081	chr17:25221272-25221793	chr17	25495147	273354
chr1:81732827-81732953	ENSG00000117114	81771845	38892	chr2:273263533-273263661	chr2	277602151	4338490	chr6:66258011-66258136	chr6	66216074	41937	chr5:82123863-82123989	chr5	81707657	416206	chr3:63413140-63413266	chr3	63355165	57975
chr2:67894394-67894448	ENSG00000143971	67624451	269943	chr14:99680535-99680587	chr14	102047669	2367082	chr10:66859027-66859079	chr10	66631403	227624	chr15:34441999-34442051	chr15	34678370	236319	chr11:66088418-66088470	chr11	65813352	275066
chr15:60088791-60088907	ENSG00000140299	59981733	107058	chr8:80477626-80477742	chr8	76675968	3801658	chr30:24634165-24634281	chr30	24546564	87601	chr1:131949532-131949648	chr1	132022504	72856	chr10:50515710-50515826	chr10	50628360	112534
chr6:14550991-14551304	ENSG00000112149	14117872	433119	chr17:23003108-23003418	chr17	26364943	3361525	chr35:13875152-13875467	chr35	13489273	385879	chr20:14010015-14010328	chr20	13617586	392429	chr23:41980941-41981255	chr23	42354680	373425
chr9:104657846-104658099	ENSG00000198785	104500862	156984	chr5:71941844-71942098	chr5	69564696	2377148	chr11:58580578-58580832	chr11	58422278	158300	chr25:8197963-8198216	chr25	8054706	143257	chr8:93371169-93371423	chr8	93146121	225048
chr2:140103611-140103746	ENSG00000144227	139537918	565693	chr3:29169684-29169822	chr3	68828	29100856	chr19:41906681-41906815	chr19	41318893	587788	chr18:22767932-22768066	chr18	22271482	496450	chr2:57958985-57959120	chr2	58582460	623340
chr2:145979244-145979376	ENSG00000169554	145282147	697097	chr3:39147452-39147578	chr3	35196121	3951331	chr19:47217845-47217978	chr19	46550583	667262	chr18:28102208-28102341	chr18	27461817	640391	chr2:51490163-51490296	chr2	52274862	784566
chr2:146036421-146036861	ENSG00000169554	145282147	754274	chr3:39213354-39213793	chr3	35196121	4017233	chr19:47300329-47300769	chr19	46550583	749746	chr18:28161817-28162252	chr18	27461817	700000	chr2:51359126-51359560	chr2	52274862	915302
chr3:62478391-62478529	ENSG00000153266	62359999	118392	chr15:19642645-19642779	chr15	16854938	2787707	chr20:28585623-28585761	chr20	28704683	118922	chr16:26578480-26578618	chr16	26692919	114301	chr22:38947659-38947797	chr22	39068358	120561
chr2:146016855-146016951	ENSG00000169554	145282147	734708	chr3:39194233-39194329	chr3	35196121	3998112	chr19:47279680-47279776	chr19	46550583	729097	chr18:28141268-28141364	chr18	27461817	679451	chr2:51413266-51413362	chr2	52274862	861500
chr1:166154099-166154171	ENSG00000188859	166136206	17893	chr13:89965527-89965597	chr13	101283804	11318207	chr38:17271977-17272050	chr38	17292326	20276	chr5:31504722-31504795	chr5	31607112	102317	chr3:2746943-2747016	chr3	2774510	27494
chr5:102001003-102001078	ENSG00000145730	102089685	88607	chr9:104636535-104636610	chr9	110737325	6100715	chr3:8495765-8495840	chr3	8290489	205276	chr14:67544526-67544601	chr14	67474600	69926	chr7:104095841-104095915	chr7	104175550	79635
chr1:42242827-42243079	ENSG00000127129	41950344	292483	chr5:145991098-145991347	chr5	142891220	3099878	chr15:1395347-1395597	chr15	1647965	252368	chr2:16531488-16531739	chr2	16793577	261838	chr3:105013176-105013427	chr3	105299334	285907
chr13:76617754-76617825	ENSG00000136153	76194570	423184	chr15:90110926-90110998	chr15	87900117	2210809	chr22:29804867-29804939	chr22	29519369	285498	chr17:49082017-49082089	chr17	48815013	267004	chr12:51435922-51435994	chr12	51141637	294285
chr16:73727037-73727329	ENSG00000140836	73093597	633440	chr19:51060778-51061071	chr19	53739472	2678401	chr5:79247173-79247466	chr5	78610027	637146	chr3:20448917-20449208	chr3	21001311	552103	chr18:37672323-37672616	chr18	38186022	513406
chr13:23264117-23264304	ENSG00000102683	23755091	490787	chr15:43253203-43253387	chr15	45385876	2132489	chr25:15766193-15766380	chr25	15403190	363003	chr17:3351573-3351760	chr17	3857467	505707	chr12:35089118-35089304	chr12	34954970	134148
chr4:45372805-45372884	ENSG00000163281	44728612	644193	chr14:40420121-40420199	chr14	62736435	22316236	chr13:41742865-41742942	chr13	41228560	514305	chr3:83010689-83010768	chr3	83528289	517521	chr6:65667033-65667112	chr6	64992219	674814
chr3:64200310-64200379	ENSG00000163636	64009658	190652	chr4:188914958-188915028	chr15	-	-	chr20:27026755-27026824	chr20	27206629	179805	chr16:25080759-25080829	chr16	25253011	172182	chr22:37332557-37332627	chr22	37538013	205386
chr2:221782886-221783019	ENSG00000116106	222438922	655903	chr9:90284353-90284486	chr9	83022498	7261855	chr37:27214139-27214272	chr37	27805314	591042	chr6:10212192-10212324	chr6	10795190	582866	chr2:109665215-109665348	chr2	110405363	740015
chr17:60144921-60145149	ENSG00000108510	60142643	2278	chr10:76420640-76420867	chr10	73685854	2734786	chr9:34636600-34636828	chr9	34641617	4789	chr11:34117620-34117848	chr11	34122135	4287	chr19:11284496-11284721	chr19	11288867	4146
chr9:103477364-103477450	ENSG00000170681	103340361	137003	chr5:72904304-72904391	chr5	68926894	3977410	chr11:57543547-57543634	chr11	57453536	90011	chr25:7160603-7160690	chr25	7054711	105892	chr8:92056599-92056685	chr8	91916199	140400
chr10:122020442-122020549	ENSG00000203805	122216466	195917	chr1:207360261-207360370	chr1	209449937	2089567	chr28:30305010-30305117	chr28	30510138	205021	chr1:12348460-12348567	chr1	12181074	167386	chr26:40686228-40686335	chr26	40882810	196475
chr9:22755108-22755381	ENSG00000176399	22446840	308268	chr5:114404468-114404741	chr5	112243551	2160917	chr11:41805103-41805372	chr11	41566167	238936	chr23:41570700-41570973	chr23	41325540	245160	chr8:21471159-21471433	chr8	21768203	296770
chr1:81530961-81531323	ENSG00000117114	81771845	240522	chr2:273480340-273480761	chr2	277602151	4121390	chr6:66422351-66422714	chr6	66216074	206277	chr5:82281185-82281547	chr5	81707657	573528	chr3:63597876-63598238	chr3	63355165	242711
chr8:27719374-27719473	ENSG00000168078	27695612	23762	chr15:52925829-52925928	chr15	49103281	3822548	chr25:29725772-29725871	chr25	29755848	29977	chr2:56457626-56457724	chr2	56418955	38671	chr8:10801416-10801514	chr8	10819982	18468
chr13:110067539-110067676	ENSG00000185950	110438915	371239	chr5:170445949-170446087	chr16	-	-	chr22:57930417-57930555	chr22	58227450	296895	chr17:76916074-76916212	chr17	77239776	323564	chr12:88437550-88437688	chr12	88669589	231901
chr2:78295365-78295494	ENSG00000176204	77820445	474920	chr4:178699930-178700056	chr4	175391882	3308048	chr17:45709044-45709172	chr17	46091137	381965	chr15:25525080-25525209	chr15	25944957	419748	chr11:57936632-57936760	chr11	58431067	494307
chr2:51935589-51935773	ENSG00000179915	51259674	675915	chr1:165328567-165328760	chr6	-	-	chr10:53158306-53158498	chr10	52670843	487463	chr15:47981566-47981753	chr15	48567697	585944	chr11:34068532-34068724	chr11	33353304	715228
chr5:109626338-109626581	ENSG00000164209	110073837	447256	chr9:112398339-112398581	chr18	-	-	chr3:2061806-2062051	chr3	1719781	342025	chr14:61183688-61183929	chr14	60895084	288604	chr7:111916027-111916265	chr7	112332867	416602
chr16:50952112-50952461	ENSG00000103449	51185278	232817	chr19:30187784-30188131	chr19	34379537	4191406	chr2:64449827-64450174	chr2	64245467	204360	chr3:3787658-3788004	chr3	3978895	190891	chr18:19422554-19422901	chr18	19653740	230839
chr7:42493565-42493876	ENSG00000106571	42277469	216096	chr2:111849679-111849986	chr17	-	-	chr18:7609838-7610151	chr18	7800858	190707	chr4:13565020-13565331	chr4	13366275	198745	chr4:79222497-79222809	chr4	79444274	221465
chr9:107085698-107085790	ENSG00000186881	107266455	180665	chr5:73388946-73389038	chr5	69134585	4254361	chr11:60313116-60313208	chr11	60467149	153941	chr25:10269912-10270004	chr25	10431380	161376	chr8:95594409-95594499	chr8	95761536	167037
chr2:59813543-59813638	ENSG00000119866	60780702	967064	chr14:105358851-105358962	chr14	108548256	3189294	chr10:59813350-59813445	chr10	60689285	875840	chr15:41389887-41389982	chr15	40536640	853247	chr11:42190087-42190182	chr11	43174031	983849
chr2:220871039-220871103	ENSG00000124006	220436581	434458	chr9:89384682-89384749	chr9	82469082	6915600	chr37:26435356-26435420	chr37	26079752	355604	chr6:9422731-9422795	chr6	9063215	359516	chr2:108645729-108645793	chr2	108226115	419614
chr2:220929357-220929759	ENSG00000124006	220436581	492776	chr9:89456534-89456938	chr9	82469082	6987452	chr37:26491716-26492108	chr37	26079752	411964	chr6:9475320-9475712	chr6	9063215	412105	chr2:108716140-108716532	chr2	108226115	490025
chr5:117569259-117569503	ENSG00000169570	118324240	754737	chr18:43563146-43563384	chr14	-	-	chr11:7789276-7789523	chr11	8346507	556984	chr14:54691053-54691297	chr14	54153274	537779	chr7:36843183-36843426	chr7	36230534	612649
chr3:89957726-89958179	ENSG00000044524	89156674	801052	chr13:1614782-1615235	chr11	-	-	chr33:1394747-1395200	chr33	785725	609022	chr26:952639-953089	chr26	1656872	703783	chr1:37489685-37490138	chr1	36715182	774503
chr16:50895990-50896200	ENSG00000103449	51185278	289078	chr19:30253971-30254183	chr19	34379537	4125354	chr2:64507809-64508018	chr2	64245467	262342	chr3:3734268-3734480	chr3	3978895	244415	chr18:19363598-19363811	chr18	19653740	289929
chr4:23677209-23677601	ENSG00000109606	24586173	908572	chr14:63404979-63405370	chr14	61248770	2156209	chr3:86379091-86379482	chr3	85549939	829152	chr3:100970229-100970620	chr3	100177256	792973	chr6:44719742-44720134	chr6	45683587	963453
chr1:81696766-81697212	ENSG00000117114	81771845	74633	chr2:273305135-273305560	chr2	277602151	4296591	chr6:66282958-66283404	chr6	66216074	66884	chr5:82151926-82152371	chr5	81707657	444269	chr3:63447711-63448156	chr3	63355165	92546
chr18:52762893-52763166	ENSG00000166510	52626739	136154	chr18:64814931-64815205	chr18	67564699	2749494	chr1:20520598-20520869	chr1	20641290	120421	chr8:72787161-72787435	chr8	72654605	132556	chr24:54932656-54932929	chr24	54786447	146209
chr5:98446643-98446843	ENSG00000153922	98262240	184403	chr9:101032438-101032643	chr1	-	-	chr3:11132103-11132312	chr3	11288970	156658	chr14:70342426-70342627	chr14	70498333	155706	chr7:100786943-100787144	chr7	100565742	221201
chr6:163788435-163788684	ENSG00000112531	163835032	46348	chr1:49228255-49228501	chr1	52104730	2876229	chr1:51760486-51760735	chr1	51799714	38979	chr31:4732146-4732396	chr31	4808499	76103	chr9:100233675-100233928	chr9	100370771	136843
chr4:143094612-143094684	ENSG00000164136	142557752	536860	chr19:40626606-40626675	chr19	34544021	6082585	chr19:1064441-1064513	chr19	1352457	287944	chr2:89603013-89603085	chr2	89935123	332038	chr17:15962001-15962073	chr17	16363886	401813
chr7:79936867-79937042	ENSG00000135218	79998891	61849	chr4:8910299-8910475	chr4	13978107	5067632	chr18:20050279-20050452	chr18	20299811	249359	chr4:963528-963702	chr4	738697	224831	chr4:41019814-41019983	chr4	40675539	344275
chrX:76594273-76594348	ENSG00000196468	76709648	115300	chrX:77437908-77437983	chrX	55910572	21527336	chrX:59651048-59651122	chrX	59739397	88275	chrX:57378002-57378077	chrX	57443444	65367	chrX:80041627-80041702	chrX	79954814	86813
chr3:110495292-110495350	ENSG00000177707	110788918	293568	chr11:60005417-60005487	chr11	62144557	2139070	chr33:15650079-15650138	chr33	15871172	221034	chr19:46590836-46590894	chr19	46336940	253896	chr1:56033292-56033350	chr1	56308185	274835
chr7:115028749-115028834	ENSG00000135272	114562209	466540	chr4:44027123-44027205	chr4	41790494	2236629	chr14:54477330-54477415	chr14	54063568	413762	chr4:72639427-72639512	chr4	72206834	432593	chr4:53367650-53367735	chr4	53854749	487014
chr5:51798907-51799278	ENSG00000213949	52083730	284452	chr2:66100546-66100944	chr2	71763917	5662973	chr4:62681926-62682302	chr4	62455624	226302	chr21:19362763-19363137	chr21	19153982	208781	chr20:26551024-26551403	chr20	26293313	257711
chr5:98652655-98652755	ENSG00000153922	98262240	390415	chr9:101355306-101355406	chr1	-	-	chr3:10960535-10960635	chr3	11288970	328335	chr14:70159026-70159126	chr14	70498333	339207	chr7:101021574-101021674	chr7	100565742	455832
chr7:42760707-42761310	ENSG00000136197	42951904	190594	chr17:53599145-53599732	chr17	50782041	2817104	chr18:7359414-7360019	chr18	7233303	126111	chr4:13803080-13803683	chr4	13919887	116204	chr4:78963871-78964475	chr4	78839309	124562
chr2:221026661-221026943	ENSG00000124006	220436581	590080	chr9:89548029-89548312	chr9	82469082	7078947	chr37:26574733-26575016	chr37	26079752	494981	chr6:9560373-9560656	chr6	9063215	497158	chr2:108810597-108810865	chr2	108226115	584482
chr2:184089658-184090154	ENSG00000163002	183982241	107417	chr4:21958885-21959376	chr3	-	-	chr36:26214225-26214721	chr36	26137763	76462	chr18:60744382-60744878	chr18	60647621	96761	chr2:13388135-13388631	chr2	13487161	98530
chr2:145874630-145875022	ENSG00000169554	145282147	592483	chr3:39046366-39046749	chr3	35196121	3850245	chr19:47118465-47118853	chr19	46550583	567882	chr18:28002860-28003247	chr18	27461817	541043	chr2:51610481-51610866	chr2	52274862	663996
chr2:221102511-221102611	ENSG00000124006	220436581	665930	chr9:89621522-89621618	chr9	82469082	7152440	chr37:26640240-26640340	chr37	26079752	560488	chr6:9628823-9628923	chr6	9063215	565608	chr2:108913936-108914039	chr2	108226115	687821
chr5:157952781-157952845	ENSG00000164330	158526769	573924	chr10:30162098-30162161	chr10	23523689	6638409	chr4:51912334-51912399	chr4	51378963	533371	chr14:20923724-20923788	chr14	20400279	523445	chr7:72215430-72215494	chr7	72804182	588688
chr12:100071370-100071430	ENSG00000180219	100041531	29839	chr7:30901916-30901976	chr13	-	-	chr15:38910929-38910989	chr15	38890120	20809	chr28:23931161-23931221	chr28	23899793	31368	chr5:64144406-64144601	chr5	64094901	49505
chr2:221752643-221752932	ENSG00000116106	222438922	685990	chr9:90258265-90258555	chr9	83022498	7235767	chr37:27182834-27183110	chr37	27805314	622204	chr6:10182161-10182446	chr6	10795190	612744	chr2:109621857-109622142	chr2	110405363	783221
chr2:145862227-145862460	ENSG00000169554	145282147	580080	chr3:39027250-39027485	chr3	35196121	3831129	chr19:47102340-47102580	chr19	46550583	551757	chr18:27989378-27989615	chr18	27461817	527561	chr2:51628074-51628312	chr2	52274862	646550
chr2:78366179-78366293	ENSG00000176204	77820445	545734	chr4:178784122-178784235	chr4	175391882	3392240	chr17:45651402-45651514	chr17	46091137	439623	chr15:25459101-25459215	chr15	25944957	485742	chr11:57823243-57823356	chr11	58431067	607711
chr18:58390503-58390728	ENSG00000166603	58040001	350502	chr13:28757291-28757505	chr18	-	-	chr1:15915477-15915701	chr1	16131567	215866	chr8:77416656-77416881	chr8	77171048	245608	chr24:59872509-59872740	chr24	59672094	200415
chr5:158034333-158034419	ENSG00000164330	158526769	492350	chr10:30085022-30085111	chr10	23523689	6561333	chr4:51847730-51847819	chr4	51378963	468767	chr14:20859940-20860029	chr14	20400279	459661	chr7:72300564-72300649	chr7	72804182	503533
chr3:90144863-90144913	ENSG00000044524	89156674	988189	chr13:1412796-1412846	chr11	-	-	chr33:1540072-1540122	chr33	785725	754347	chr26:800383-800433	chr26	1656872	856439	chr1:37688921-37688971	chr1	36715182	973739
chr18:30121484-30121773	ENSG00000141441	30050447	71037	chr18:12180154-12180437	chr18	14769099	2588662	chr7:57167585-57167874	chr7	57295067	127193	chr8:53311786-53312076	chr8	53246251	65535	chr24:24922769-24923058	chr24	25005192	82134
chrX:22863485-22863541	ENSG00000184735	23018087	154546	chrX:42035668-42035722	chr8	-	-	chrX:18605568-18605623	chrX	18776371	170748	chrX:17204430-17204485	chrX	17345722	141237	chrX:127564702-127564757	chrX	127364927	199775
chr16:50985451-50985864	ENSG00000103449	51185278	199414	chr19:30157247-30157656	chr19	34379537	4221881	chr2:64419755-64420183	chr2	64245467	174288	chr3:3816415-3816833	chr3	3978895	162062	chr18:19459356-19459773	chr18	19653740	193967
chr15:60120699-60120805	ENSG00000140299	59981733	138966	chr8:80446747-80446853	chr8	76675968	3770779	chr30:24662807-24662914	chr30	24546564	116243	chr1:131926234-131926340	chr1	132022504	96164	chr10:50486059-50486165	chr10	50628360	142195
chr2:59210215-59210765	ENSG00000115392	58468507	741708	chr14:105919740-105920276	chr14	110369224	4448948	chr10:59291679-59292227	chr10	58632368	659311	chr15:41900864-41901413	chr15	42591277	689864	chr11:41556375-41556934	chr11	40744419	811956
chr5:43905280-43905391	ENSG00000112992	43602794	302486	chr2:67645607-67645716	chr2	70640042	2994326	chr4:66187230-66187341	chr4	66437890	250549	chr21:22848156-22848267	chr21	23086192	237925	chr20:30963367-30963477	chr20	31258005	294528
chr7:115115488-115116077	ENSG00000135272	114562209	553279	chr4:44137702-44138290	chr4	41790494	2347208	chr14:54557109-54557692	chr14	54063568	493541	chr4:72734084-72734673	chr4	72206834	527250	chr4:53276649-53277240	chr4	53854749	577509
chr6:104873233-104873608	ENSG00000085382	105307794	434186	chr19:61998572-62000420	chr20	-	-	chr12:61938472-61938841	chr12	62329980	391139	chr10:54882250-54882625	chr10	55242806	360181	chr9:46194887-46195260	chr9	45744424	450463
chr4:150818628-150819080	ENSG00000170390	150999426	180346	chr19:47609791-47610249	chr2	-	-	chr15:47948344-47948795	chr15	48119273	170478	chr2:83423641-83424092	chr2	83278289	145352	chr17:7938267-7938718	chr17	7742116	196151
chr3:177623004-177623275	ENSG00000197584	177990720	367445	chr2:126325527-126325801	chr2	137954821	11629020	chr34:41251243-41251515	chr34	41963562	712047	chr19:17293551-17293821	chr19	17863925	570104	chr1:89745545-89745817	chr1	89080346	665199
chr3:177123520-177123754	ENSG00000177565	176915261	208259	chr2:129060638-129060872	chr2	127025374	2035264	chr34:40871258-40871492	chr34	40612783	258475	chr19:16887168-16887400	chr19	16734808	152360	chr1:90261689-90261924	chr1	90428231	166307
chr13:61280277-61280483	ENSG00000083544	60970591	309686	chr14:76421496-76421700	chr15	-	-	chr22:16570844-16571048	chr22	16343861	226983	chr17:36046709-36046913	chr17	35816575	230134	chr12:1336253-1336455	chr12	1685262	348807
chr12:51058242-51058382	ENSG00000123268	51157493	99111	chrX:116315393-116315526	chr7	-	-	chr27:4080929-4081069	chr27	3992904	88025	chr6:68166085-68166225	chr6	68255415	89190	chr5:29422748-29422888	chr5	29336696	86052
chrX:22683164-22683336	ENSG00000184735	23018087	334751	chrX:41737982-41738150	chr8	-	-	chrX:18450528-18450695	chrX	18776371	325676	chrX:17075212-17075384	chrX	17345722	270338	chrX:127740204-127740376	chrX	127364927	375277
chr5:117520491-117520925	ENSG00000169570	118324240	803315	chr18:43501150-43501582	chr14	-	-	chr11:7743824-7744257	chr11	8346507	602250	chr14:54726496-54726928	chr14	54153274	573222	chr7:36888367-36888801	chr7	36230534	657833
chr13:23222689-23222771	ENSG00000102683	23755091	532320	chr15:43208505-43208587	chr15	45385876	2177289	chr25:15807636-15807717	chr25	15403190	404446	chr17:3311417-3311497	chr17	3857467	545970	chr12:35109583-35109663	chr12	34954970	154613
chr2:17275265-17275345	ENSG00000214842	17699706	424361	chr6:44385072-44385152	chr6	46895070	2509918	chr17:12624370-12624450	chr17	12998855	374405	chr15:77652037-77652117	chr15	77292419	359618	chr11:81583743-81583823	chr11	81239874	343869
chr2:220689716-220689870	ENSG00000124006	220436581	253135	chr9:89186070-89186247	chr9	82469082	6716988	chr37:26285725-26285877	chr37	26079752	205973	chr6:9263693-9263846	chr6	9063215	200478	chr2:108457980-108458224	chr2	108226115	231865
chr18:52911872-52912058	ENSG00000166510	52626739	285133	chr18:64676418-64676638	chr18	67564699	2888061	chr1:20400850-20401036	chr1	20641290	240254	chr8:72914384-72914570	chr8	72654605	259779	chr24:55073634-55073822	chr24	54786447	287187
chr6:135140654-135140706	ENSG00000118514	135271260	130554	chr1:26193334-26193386	chr1	18065413	8127921	chr1:27605610-27605662	chr1	27694895	89233	chr10:80642753-80642805	chr10	80753675	110870	chr9:73883494-73883547	chr9	74002359	118812
chrX:131727323-131727466	ENSG00000076770	131623996	103327	chr10:92506745-92506889	chrX	-	-	chrX:103494958-103495102	chrX	103370674	124284	chrX:105416189-105416333	chrX	105256533	159656	chrX:16358476-16358620	chrX	16225696	132780
chr8:20695702-20695819	ENSG00000061337	20161474	534228	chr15:57348329-57348446	chr16	-	-	chr25:36271587-36271702	chr25	36804789	533087	chr2:49900458-49900575	chr2	49368485	531973	chr8:68566528-68566645	chr8	67867782	698746
chr18:54126276-54126551	ENSG00000091157	54318574	192023	chr18:63562694-63562972	chr18	58326472	5236222	chr1:19311569-19311847	chr1	19157893	153676	chr8:73971663-73971941	chr8	74126513	154572	chr24:56291678-56291955	chr24	56467339	175384
chrX:27753173-27753342	ENSG00000177689	27826107	72765	chrX:59366797-59366963	chrX	61814441	2447478	chrX:22913557-22913725	chrX	22982277	68552	chrX:21312710-21312879	chrX	21386525	73646	chrX:122063797-122063966	chrX	121979512	84285
chr2:221571213-221571476	ENSG00000116106	222438922	867446	chr9:90052591-90052851	chr9	83022498	7030093	chr37:27036681-27036944	chr37	27805314	768370	chr6:10022341-10022604	chr6	10795190	772586	chr2:109431105-109431365	chr2	110405363	973998
chr12:87858385-87858460	ENSG00000133641	88427623	569163	chr7:42560376-42560449	chr7	40353933	2206443	chr15:28671050-28671127	chr15	29183012	511885	chr28:13858953-13859028	chr28	14310353	451325	chr5:17284852-17284927	chr5	17892475	607548
chr5:127220669-127220786	ENSG00000064651	127419458	198672	chr16:46259376-46259490	chr18	-	-	chr11:16947423-16947539	chr11	17143991	196452	chr14:46827544-46827661	chr14	46635433	192111	chr7:27286521-27286638	chr7	27064921	221600
chr5:102729017-102729347	ENSG00000181751	102594403	134614	chr9:105091637-105091977	chr9	110878884	5786907	chr3:7858299-7858646	chr3	7967907	109261	chr14:66908212-66908540	chr14	67030817	122277	chr7:104835989-104836318	chr7	104692816	143173
chr2:67910681-67910983	ENSG00000143971	67624451	286230	chr14:99710426-99710729	chr14	102047669	2336940	chr10:66878373-66878677	chr10	66631403	246970	chr15:34423176-34423477	chr15	34678370	254893	chr11:66110939-66111231	chr11	65813352	297587
chr2:146094301-146094501	ENSG00000169554	145282147	812154	chr3:39362151-39362347	chr3	35196121	4166030	chr19:47357216-47357416	chr19	46550583	806633	chr18:28222192-28222392	chr18	27461817	760375	chr2:51289331-51289736	chr2	52274862	985126
chr16:73523755-73523844	ENSG00000140836	73093597	430158	chr1:180985110-180985199	chr19	-	-	chr5:79064090-79064180	chr5	78610027	454063	chr3:20629583-20629672	chr3	21001311	371639	chr18:37864052-37864138	chr18	38186022	321884
chr9:109201370-109201423	ENSG00000148143	109625378	423955	chr5:77936167-77936224	chr5	75809671	2126496	chr11:62068375-62068429	chr11	62401696	333267	chr25:12324165-12324218	chr25	12656077	331859	chr8:97852854-97852906	chr8	98274178	421272
chr2:59219791-59219857	ENSG00000115392	58468507	751284	chr14:105912430-105912495	chr14	110369224	4456729	chr10:59297106-59297170	chr10	58632368	664738	chr15:41892622-41892685	chr15	42591277	698592	chr11:41568497-41568561	chr11	40744419	824078
chr1:81399199-81399249	ENSG00000117114	81771845	372596	chr2:273607983-273608040	chr2	277602151	3994111	chr6:66533613-66533663	chr6	66216074	317539	chr5:82390166-82390219	chr5	81707657	682509	chr3:63741787-63741841	chr3	63355165	386622
chr2:123964986-123965128	ENSG00000155052	124782864	817736	chr13:16501927-16502072	chr13	20631641	4129569	chr19:27142073-27142215	chr19	26397894	744179	chr18:7436547-7436689	chr18	6667430	769117	chr2:75506622-75506764	chr2	76308191	801427
chr1:166272684-166272778	ENSG00000188859	166136206	136478	chr13:89873312-89873405	chr13	101283804	11410399	chr38:17208565-17208658	chr38	17292326	83668	chr5:31440438-31440532	chr5	31607112	166580	chr3:2672385-2672479	chr3	2774510	102031
chr8:36045810-36046158	ENSG00000215262	36641842	595684	chr16:67533563-67533918	chr16	70663273	3129355	chr16:28950483-28950833	chr16	28478384	472099	chr27:9172426-9172776	chr27	8699565	472861	chr27:31374730-31375080	chr27	31849126	474046
chr16:16596513-16596564	ENSG00000091262	16317379	279134	chr1:193173621-193173675	chr1	103096453	90077168	chr6:27627252-27627304	chr6	27800215	172911	chr13:29466589-29466640	chr13	29615990	149350	chr25:14838772-14838823	chr25	14643302	195470
chr18:52755915-52756096	ENSG00000166510	52626739	129176	chr18:64821980-64822160	chr18	67564699	2742539	chr1:20527945-20528126	chr1	20641290	113164	chr8:72780271-72780452	chr8	72654605	125666	chr24:54922851-54923032	chr24	54786447	136404
chr6:114462457-114462846	ENSG00000196591	114332472	129985	chr20:42185623-42186012	chr20	44827687	2641675	chr12:70213086-70213478	chr12	70072758	140328	chr10:63117073-63117461	chr10	62976771	140302	chr9:36759846-36760237	chr9	36918295	158058
chr2:221743400-221743568	ENSG00000116106	222438922	695354	chr9:90240678-90240846	chr9	83022498	7218180	chr37:27174663-27174831	chr37	27805314	630483	chr6:10176047-10176215	chr6	10795190	618975	chr2:109612444-109612612	chr2	110405363	792751
chr2:220702893-220703175	ENSG00000124006	220436581	266312	chr9:89213373-89213657	chr9	82469082	6744291	chr37:26295239-26295526	chr37	26079752	215487	chr6:9273384-9273666	chr6	9063215	210169	chr2:108468149-108468423	chr2	108226115	242034
chr9:107138808-107138859	ENSG00000186881	107266455	127596	chr5:73450288-73450339	chr5	69134585	4315703	chr11:60367567-60367618	chr11	60467149	99531	chr25:10321788-10321839	chr25	10431380	109541	chr8:95645065-95645116	chr8	95761536	116420
chr13:110059377-110059456	ENSG00000185950	110438915	379459	chr5:170453544-170453623	chr16	-	-	chr22:57924253-57924332	chr22	58227450	303118	chr17:76908897-76908976	chr17	77239776	330800	chr12:88428024-88428103	chr12	88669589	241486
chr2:17318308-17318460	ENSG00000214842	17699706	381246	chr6:44335866-44336019	chr6	46895070	2559051	chr17:12677212-12677364	chr17	12998855	321491	chr15:77604533-77604685	chr15	77292419	312114	chr11:81536146-81536298	chr11	81239874	296272
chr8:36168512-36168693	ENSG00000215262	36641842	473149	chr16:67648649-67648823	chr16	70663273	3014450	chr16:28867622-28867803	chr16	28478384	389238	chr27:9084738-9084919	chr27	8699565	385173	chr27:31476876-31477061	chr27	31849126	372065
chr9:106677022-106677163	ENSG00000136824	106856541	179378	chr5:69743526-69743666	chr5	73151949	3408283	chr11:59952225-59952366	chr11	60091674	139308	chr25:9905937-9906078	chr25	10059214	153136	chr8:95178938-95179079	chr8	95362953	183874
chr2:221038694-221039059	ENSG00000124006	220436581	602113	chr9:89558254-89558613	chr9	82469082	7089172	chr37:26585824-26586190	chr37	26079752	506072	chr6:9571148-9571513	chr6	9063215	507933	chr2:108831320-108831689	chr2	108226115	605205
chr2:221127003-221127509	ENSG00000124006	220436581	690422	chr9:89646412-89646927	chr9	82469082	7177330	chr37:26664587-26665096	chr37	26079752	584835	chr6:9654189-9654696	chr6	9063215	590974	chr2:108937821-108938329	chr2	108226115	711706
chr2:15952551-15952621	ENSG00000134323	16080686	128065	chr6:47027348-47027418	chr6	51353994	4326576	chr17:11628050-11628120	chr17	11718464	90344	chr15:78683032-78683102	chr15	78588928	94104	chr11:82623365-82623435	chr11	82695073	71638
chr2:161774796-161774857	ENSG00000136560	161993419	218562	chr13:86211256-86211317	chr3	-	-	chr36:6535141-6535203	chr36	6769333	234130	chr18:41502727-41502788	chr18	41680812	178024	chr2:35589549-35589610	chr2	35343041	246508
chr1:166424857-166425010	ENSG00000188859	166136206	288651	chr13:89743565-89743721	chr13	101283804	11540083	chr38:17100258-17100775	chr38	17292326	191551	chr5:31331136-31331290	chr5	31607112	275822	chr3:2497743-2497897	chr3	2774510	276613
chr6:114385164-114385275	ENSG00000196591	114332472	52692	chr20:42272774-42272889	chr20	44827687	2554798	chr12:70149011-70149125	chr12	70072758	76253	chr10:63046223-63046336	chr10	62976771	69452	chr9:36837575-36837686	chr9	36918295	80609
chr5:51703752-51704038	ENSG00000213949	52083730	379692	chr2:66194899-66195187	chr2	71763917	5568730	chr4:62770322-62770609	chr4	62455624	314698	chr21:19444781-19445066	chr21	19153982	290799	chr20:26674961-26675252	chr20	26293313	381648
chr3:16482865-16482941	ENSG00000154814	16306706	176159	chr9:11764536-11764613	chr16	-	-	chr23:26344525-26344601	chr23	26516070	171469	chr16:65152356-65152432	chr16	65326619	174187	chr1:155222017-155222090	chr1	155020422	201595
chr7:115135191-115135397	ENSG00000135272	114562209	572982	chr4:44155710-44155918	chr4	41790494	2365216	chr14:54575339-54575546	chr14	54063568	511771	chr4:72752841-72753048	chr4	72206834	546007	chr4:53258100-53258303	chr4	53854749	596446
chr16:73735329-73735763	ENSG00000140836	73093597	641732	chr19:51054990-51055424	chr19	53739472	2684048	chr5:79253915-79254349	chr5	78610027	643888	chr3:20442501-20442934	chr3	21001311	558377	chr18:37666278-37666712	chr18	38186022	519310
chr5:157911341-157911690	ENSG00000164330	158526769	615079	chr10:30199635-30200002	chr10	23523689	6675946	chr4:51951284-51951635	chr4	51378963	572321	chr14:20963130-20963478	chr14	20400279	562851	chr7:72174994-72175335	chr7	72804182	628847
chr8:20588137-20588270	ENSG00000061337	20161474	426663	chr15:57459433-57459570	chr16	-	-	chr25:36373636-36373771	chr25	36804789	431018	chr2:49772691-49772821	chr2	49368485	404206	chr8:68433313-68433446	chr8	67867782	565531
chr16:73352439-73352862	ENSG00000140836	73093597	258842	chr19:51520633-51521059	chr19	53739472	2218413	chr5:78910250-78910672	chr5	78610027	300223	chr3:20782360-20782782	chr3	21001311	218529	chr18:38017688-38018111	chr18	38186022	167911
chr7:115116301-115116410	ENSG00000135272	114562209	554092	chr4:44138485-44138594	chr4	41790494	2347991	chr14:54557866-54557975	chr14	54063568	494298	chr4:72734890-72734999	chr4	72206834	528056	chr4:53276322-53276431	chr4	53854749	578318
chr5:102086184-102086511	ENSG00000145730	102089685	3174	chr9:104723805-104724130	chr9	110737325	6013195	chr3:8420155-8420482	chr3	8290489	129666	chr14:67477178-67477504	chr14	67474600	2578	chr7:104172404-104172732	chr7	104175550	2818
chr2:138601713-138601930	ENSG00000150540	138721590	119660	chr13:52152460-52152681	chr3	-	-	chr19:40494521-40494741	chr19	40656232	161491	chr18:21388158-21388377	chr18	21516160	127783	chr2:59568393-59568611	chr2	59417441	150952
chr12:99766093-99766314	ENSG00000180219	100041531	275217	chr7:31160663-31160882	chr13	-	-	chr15:38670799-38671017	chr15	38890120	219103	chr28:23689537-23689758	chr28	23899793	210035	chr5:63876505-63876729	chr5	64094901	218172
chrX:130751212-130751627	ENSG00000171054	130677950	73262	chrX:137662751-137663166	chr1	-	-	chrX:102714388-102714803	chrX	102640011	74377	chrX:104674035-104674450	chrX	104605998	68037	chrX:15537962-15538375	chrX	15453981	83981
chr18:54182454-54182582	ENSG00000091157	54318574	135992	chr18:63507318-63507445	chr18	58326472	5180846	chr1:19263222-19263350	chr1	19157893	105329	chr8:74017606-74017734	chr8	74126513	108779	chr24:56352250-56352378	chr24	56467339	114961
chr15:54150110-54150210	ENSG00000166415	54055075	95035	chr8:72356473-72356573	chr8	80586840	8230267	chr30:19418551-19418651	chr30	19314967	103584	chr1:136900142-136900242	chr1	136995785	95543	chr10:56566746-56566846	chr10	56678885	112039
chr6:135174505-135174583	ENSG00000118514	135271260	96677	chr1:26219651-26219727	chr1	18065413	8154238	chr1:27633005-27633083	chr1	27694895	61812	chr10:80667451-80667529	chr10	80753675	86146	chr9:73915592-73915670	chr9	74002359	86689
chr9:7363095-7363356	ENSG00000178445	6645650	717445	chr5:95509988-95510246	chr1	-	-	chr11:28249997-28250257	chr11	27584474	665523	chr23:28436996-28437256	chr23	27814482	622514	chr8:37756444-37756704	chr8	38468512	711808
chr12:99773537-99773676	ENSG00000180219	100041531	267855	chr7:31152080-31152219	chr13	-	-	chr15:38686496-38686635	chr15	38890120	203485	chr28:23703979-23704118	chr28	23899793	195675	chr5:63885358-63885494	chr5	64094901	209407
chr13:23306957-23307041	ENSG00000102683	23755091	448050	chr15:43314479-43314563	chr15	45385876	2071313	chr25:15730225-15730310	chr25	15403190	327035	chr17:3390281-3390364	chr17	3857467	467103	chr12:35067771-35067855	chr12	34954970	112801
chr5:157958834-157959354	ENSG00000164330	158526769	567415	chr10:30156350-30156868	chr10	23523689	6632661	chr4:51906581-51907101	chr4	51378963	527618	chr14:20918695-20919214	chr14	20400279	518416	chr7:72220793-72221312	chr7	72804182	582870
chrX:22807256-22807455	ENSG00000184735	23018087	210632	chrX:41962325-41962518	chr8	-	-	chrX:18565945-18566144	chrX	18776371	210227	chrX:17172856-17173055	chrX	17345722	172667	chrX:127610948-127611146	chrX	127364927	246021
chr4:46919118-46919182	ENSG00000170516	46911252	7866	chr14:39060598-39060662	chr10	-	-	chr13:42887272-42887336	chr13	42740224	147048	chr3:81860797-81860861	chr3	81994410	133549	chr6:67137883-67137947	chr6	67118236	19647
chr8:67306925-67307117	ENSG00000179041	67341263	34146	chr2:124361597-124361786	chr5	-	-	chr29:15997049-15997241	chr29	16016154	18913	chr9:18851587-18851777	chr9	18816620	34967	chr14:32675232-32675424	chr14	32699359	23935
chr2:220989370-220989454	ENSG00000124006	220436581	552789	chr9:89516970-89517050	chr9	82469082	7047888	chr37:26544153-26544237	chr37	26079752	464401	chr6:9530133-9530217	chr6	9063215	466918	chr2:108778164-108778248	chr2	108226115	552049
chr18:62290773-62290864	ENSG00000166401	61637159	653614	chr4:162133940-162134028	chr13	-	-	chr1:12724814-12724905	chr1	13221421	496516	chr8:80832715-80832807	chr8	80313767	518948	chr24:12157114-12157205	chr24	12702951	545746
chr3:52341582-52341728	ENSG00000114841	52350335	8607	chr8:114198483-114198630	chr16	-	-	chr20:37450309-37450452	chr20	37442697	7612	chr16:35405422-35405565	chr16	35397464	7958	chr22:49131978-49132120	chr22	49118364	13614
chr3:147896476-147896536	ENSG00000144891	148415571	519035	chr8:97464061-97464121	chr2	-	-	chr23:43164835-43164895	chr23	43613937	449042	chr16:81139121-81139181	chr16	81548815	409634	chr1:121006136-121006196	chr1	120445395	560741
chr2:221700002-221700060	ENSG00000116106	222438922	738862	chr9:90194650-90194708	chr9	83022498	7172152	chr37:27137330-27137388	chr37	27805314	667926	chr6:10137027-10137085	chr6	10795190	658105	chr2:109561457-109561515	chr2	110405363	843848
chr17:60244435-60244817	ENSG00000108510	60142643	101792	chr10:76341741-76342126	chr10	73685854	2655887	chr9:34552404-34552789	chr9	34641617	88828	chr11:34044039-34044424	chr11	34122135	77711	chr19:11194350-11194735	chr19	11288867	94132
chr4:143052002-143052195	ENSG00000164136	142557752	494250	chr19:40589682-40589873	chr19	34544021	6045661	chr19:1105135-1105328	chr19	1352457	247129	chr2:89638398-89638592	chr2	89935123	296531	chr17:16015005-16015196	chr17	16363886	348690
chr16:51089569-51089867	ENSG00000103449	51185278	95411	chr19:30074770-30075054	chr19	34379537	4304483	chr2:64330937-64331235	chr2	64245467	85470	chr3:3907421-3907717	chr3	3978895	71178	chr18:19560809-19561107	chr18	19653740	92633
chr5:109625965-109626062	ENSG00000164209	110073837	447775	chr9:112397965-112398063	chr18	-	-	chr3:2062345-2062441	chr3	1719781	342564	chr14:61184207-61184303	chr14	60895084	289123	chr7:111915670-111915765	chr7	112332867	417102
chr2:221002838-221002960	ENSG00000124006	220436581	566257	chr9:89528916-89529051	chr9	82469082	7059834	chr37:26557899-26558025	chr37	26079752	478147	chr6:9543808-9543932	chr6	9063215	480593	chr2:108789215-108789343	chr2	108226115	563100
chr4:150420629-150420744	ENSG00000170390	150999426	578682	chr19:46735015-46735134	chr2	-	-	chr15:47609103-47609222	chr15	48119273	510051	chr2:83764163-83764282	chr2	83278289	485874	chr17:8344637-8344756	chr17	7742116	602521
chr3:62530634-62530722	ENSG00000153266	62359999	170635	chr15:19594224-19594334	chr15	16854938	2739286	chr20:28532885-28532981	chr20	28704683	171702	chr16:26526403-26526493	chr16	26692919	166426	chr22:38894808-38894907	chr22	39068358	173451
chr2:59395772-59395898	ENSG00000115392	58468507	927265	chr14:105754019-105754145	chr14	110369224	4615079	chr10:59442514-59442640	chr10	58632368	810146	chr15:41752140-41752266	chr15	42591277	839011	chr11:41738877-41739003	chr11	40744419	994458
chr16:73705342-73705794	ENSG00000140836	73093597	611745	chr19:51073608-51074065	chr19	53739472	2665407	chr5:79229528-79229981	chr5	78610027	619501	chr3:20468929-20469384	chr3	21001311	531927	chr18:37695138-37695592	chr18	38186022	490430
chr2:221359481-221359836	ENSG00000124006	220436581	922900	chr9:89863438-89863789	chr9	82469082	7394356	chr37:26853795-26854157	chr37	26079752	774043	chr6:9854881-9855245	chr6	9063215	791666	chr2:109193516-109193875	chr2	108226115	967401
chr3:110644666-110644847	ENSG00000177707	110788918	144071	chr11:60131577-60131758	chr11	62144557	2012799	chr33:15767525-15767707	chr33	15871172	103465	chr19:46466980-46467162	chr19	46336940	130040	chr1:56194762-56194940	chr1	56308185	113245
chr13:23123180-23123423	ENSG00000102683	23755091	631668	chr15:43128335-43128578	chr15	45385876	2257298	chr25:15890308-15890549	chr25	15403190	487118	chr17:3213811-3214054	chr17	3857467	643413	chr12:35167811-35168048	chr12	34954970	212841
chr2:112194902-112195168	ENSG00000153094	111876955	317947	chr3:129103099-129103372	chr3	126604489	2498610	chr17:35938381-35938650	chr17	35619812	318569	chr15:14536486-14536750	chr15	14233147	303339	chr11:871324-871581	chr11	1199790	328209
chr6:163812591-163812819	ENSG00000112531	163835032	22213	chr1:49206825-49207055	chr1	52104730	2897675	chr1:51778566-51778794	chr1	51799714	20920	chr31:4748513-4748741	chr31	4808499	59758	chr9:100255308-100255536	chr9	100370771	115235
chr5:117786753-117786843	ENSG00000169570	118324240	537397	chr18:42940004-42940095	chr14	-	-	chr11:7953225-7953316	chr11	8346507	393191	chr14:54527410-54527501	chr14	54153274	374136	chr7:36635097-36635188	chr7	36230534	404563
chr3:62502424-62502598	ENSG00000153266	62359999	142425	chr15:19620166-19620340	chr15	16854938	2765228	chr20:28563637-28563811	chr20	28704683	140872	chr16:26555846-26556020	chr16	26692919	136899	chr22:38924610-38924786	chr22	39068358	143572
chr3:110337201-110337522	ENSG00000177707	110788918	451396	chr11:59836512-59836827	chr11	62144557	2307730	chr33:15526760-15527081	chr33	15871172	344091	chr19:46719724-46720042	chr19	46336940	382784	chr1:55883614-55883929	chr1	56308185	424256
chr5:51046053-51046177	ENSG00000016082	50678921	367132	chr2:69579369-69579488	chr2	66884387	2694982	chr4:63306878-63307002	chr4	63648648	341646	chr21:19954754-19954876	chr21	20306385	351509	chr20:27331594-27331718	chr20	27755504	423786
chr14:82260525-82260699	ENSG00000071537	82000205	260320	chr6:122814637-122814811	chr6	124868197	2053386	chr8:54047114-54047288	chr8	53824395	222719	chr24:26507032-26507207	chr24	26268415	238617	chr10:94276786-94276959	chr10	93965154	311632
chr2:221808577-221808649	ENSG00000116106	222438922	630273	chr9:90305902-90305979	chr9	83022498	7283404	chr37:27233791-27233863	chr37	27805314	571451	chr6:10231181-10231253	chr6	10795190	563937	chr2:109689218-109689290	chr2	110405363	716073
chr11:79389681-79389904	ENSG00000149256	79151992	237689	chr1:159803026-159803250	chr1	167398961	7595711	chr21:19267790-19268019	chr21	19502511	234492	chr7:64981251-64981475	chr7	65193196	211721	chr29:16378650-16378874	chr29	16642421	263547
chr2:221355801-221356086	ENSG00000124006	220436581	919220	chr9:89858120-89858405	chr9	82469082	7389038	chr37:26847545-26847830	chr37	26079752	767793	chr6:9849071-9849356	chr6	9063215	785856	chr2:109186295-109186580	chr2	108226115	960180
chr7:115069907-115069959	ENSG00000135272	114562209	507698	chr4:44074614-44074666	chr4	41790494	2284120	chr14:54511455-54511507	chr14	54063568	447887	chr4:72672671-72672723	chr4	72206834	465837	chr4:53329191-53329243	chr4	53854749	525506
chr7:113042103-113042287	ENSG00000164604	112727833	314270	chr4:40250431-40250615	chr4	43719803	3469188	chr14:52841043-52841227	chr14	52573892	267151	chr4:71024499-71024682	chr4	70763801	260698	chr4:55345601-55345783	chr4	55640695	294912
chr8:20359599-20359835	ENSG00000061337	20161474	198125	chr15:57779308-57779549	chr16	-	-	chr25:36571595-36571832	chr25	36804789	232957	chr2:49571727-49571964	chr2	49368485	203242	chr8:68169145-68169381	chr8	67867782	301363
chr2:138356061-138356381	ENSG00000150540	138721590	365209	chr13:51920605-51920919	chr3	-	-	chr19:40260470-40260790	chr19	40656232	395442	chr18:21210331-21210651	chr18	21516160	305509	chr2:59828346-59828665	chr2	59417441	410905
chr3:62466857-62466940	ENSG00000153266	62359999	106858	chr15:19653314-19653395	chr15	16854938	2798376	chr20:28595825-28595908	chr20	28704683	108775	chr16:26589058-26589141	chr16	26692919	103778	chr22:38957584-38957667	chr22	39068358	110691
chr6:135157217-135157336	ENSG00000118514	135271260	113924	chr1:26207564-26207682	chr1	18065413	8142151	chr1:27619667-27619786	chr1	27694895	75109	chr10:80656309-80656427	chr10	80753675	97248	chr9:73901378-73901497	chr9	74002359	100862
chr3:147800415-147800475	ENSG00000144891	148415571	615096	chr8:97570209-97570269	chr2	-	-	chr23:43092849-43092909	chr23	43613937	521028	chr16:81061136-81061193	chr16	81548815	487622	chr1:121137838-121137895	chr1	120445395	692443
chr4:134171059-134171115	ENSG00000138650	134070470	100589	chr2:151064286-151064342	chr2	156481915	5417573	chr19:8636012-8636068	chr19	8732650	96582	chr2:96985801-96985857	chr2	97081807	95950	chr17:25375768-25375825	chr17	25495147	119322
chr13:61264405-61264499	ENSG00000083544	60970591	293814	chr14:76389420-76389521	chr15	-	-	chr22:16556364-16556456	chr22	16343861	212503	chr17:36031833-36031925	chr17	35816575	215258	chr12:1350334-1350428	chr12	1685262	334834
chr2:145868685-145868827	ENSG00000169554	145282147	586538	chr3:39038715-39038857	chr3	35196121	3842594	chr19:47108932-47109074	chr19	46550583	558349	chr18:27996103-27996245	chr18	27461817	534286	chr2:51620447-51620589	chr2	52274862	654273
chr2:221698318-221698456	ENSG00000116106	222438922	740466	chr9:90192669-90192805	chr9	83022498	7170171	chr37:27136054-27136193	chr37	27805314	669121	chr6:10134980-10135118	chr6	10795190	660072	chr2:109560101-109560239	chr2	110405363	845124
chr2:59370956-59371387	ENSG00000115392	58468507	902449	chr14:105779068-105779499	chr14	110369224	4589725	chr10:59420359-59420789	chr10	58632368	787991	chr15:41772074-41772505	chr15	42591277	818772	chr11:41715932-41716354	chr11	40744419	971513
chr4:134213579-134213654	ENSG00000138650	134070470	143109	chr2:151014139-151014214	chr2	156481915	5467701	chr19:8610648-8610723	chr19	8732650	121927	chr2:96960041-96960116	chr2	97081807	121691	chr17:25347908-25347983	chr17	25495147	147164
chr2:84115042-84115102	ENSG00000163541	84687169	572067	chr4:168953687-168953747	chr4	165937928	3015759	chr17:40831872-40831932	chr17	40393146	438726	chr15:20321633-20321693	chr15	19834367	487266	chr11:51120581-51120641	chr11	50400444	720137
chr9:106564460-106564723	ENSG00000136824	106856541	291818	chr5:69871310-69871574	chr5	73151949	3280375	chr11:59853803-59854070	chr11	60091674	237604	chr25:9789898-9790164	chr25	10059214	269050	chr8:95033088-95033356	chr8	95362953	329597
chr3:64136551-64136831	ENSG00000163636	64009658	126893	chr4:188967636-188967921	chr15	-	-	chr20:27086256-27086540	chr20	27206629	120089	chr16:25137199-25137482	chr16	25253011	115529	chr22:37396344-37396627	chr22	37538013	141386
chr2:145889349-145890110	ENSG00000169554	145282147	607202	chr3:38948346-38949106	chr3	35196121	3752225	chr19:47136499-47137259	chr19	46550583	585916	chr18:28024431-28025193	chr18	27461817	562614	chr2:51590219-51590981	chr2	52274862	683881
chr17:54815400-54815511	ENSG00000153933	54911460	95949	chr10:76515606-76515718	chr10	73703726	2811880	chr9:31587461-31587573	chr9	31667102	79529	chr11:31176209-31176321	chr11	31253735	77414	chr19:7764941-7765051	chr19	7875200	110149
chrX:76308407-76308777	ENSG00000196468	76709648	400871	chrX:77185448-77185817	chrX	55910572	21274876	chrX:59481701-59482072	chrX	59739397	257325	chrX:57239556-57239926	chrX	57443444	203518	chrX:80207889-80208262	chrX	79954814	253075
chr2:145941654-145941830	ENSG00000169554	145282147	659507	chr3:39119494-39119669	chr3	35196121	3923373	chr19:47187295-47187469	chr19	46550583	636712	chr18:28071601-28071776	chr18	27461817	609784	chr2:51529072-51529246	chr2	52274862	745616
chr8:20659962-20660200	ENSG00000061337	20161474	498488	chr15:57379488-57379726	chr16	-	-	chr25:36305130-36305366	chr25	36804789	499423	chr2:49862269-49862507	chr2	49368485	493784	chr8:68524849-68525087	chr8	67867782	657067
chr2:221112662-221113078	ENSG00000124006	220436581	676081	chr9:89633142-89633553	chr9	82469082	7164060	chr37:26651718-26652129	chr37	26079752	571966	chr6:9639445-9639857	chr6	9063215	576230	chr2:108927614-108928026	chr2	108226115	701499
chr2:84359502-84359762	ENSG00000163541	84687169	327407	chr4:168690080-168690340	chr4	165937928	2752152	chr17:40634554-40634815	chr17	40393146	241408	chr15:20112259-20112519	chr15	19834367	277892	chr11:50794579-50794839	chr11	50400444	394135
chr2:221940053-221940105	ENSG00000116106	222438922	498817	chr9:90426943-90426995	chr9	83022498	7404445	chr37:27353755-27353806	chr37	27805314	451508	chr6:10348354-10348404	chr6	10795190	446786	chr2:109852752-109852803	chr2	110405363	552560
chr7:114973556-114973709	ENSG00000135272	114562209	411347	chr4:43958201-43958354	chr4	41790494	2167707	chr14:54428969-54429123	chr14	54063568	365401	chr4:72593545-72593699	chr4	72206834	386711	chr4:53418124-53418278	chr4	53854749	436471
chr16:73528942-73529152	ENSG00000140836	73093597	435345	chr19:51228762-51228973	chr19	53739472	2510499	chr5:79068622-79068833	chr5	78610027	458595	chr3:20624235-20624446	chr3	21001311	376865	chr18:37859282-37859494	chr18	38186022	326528
chr16:73746895-73748159	ENSG00000140836	73093597	653298	chr19:51042842-51044118	chr19	53739472	2695354	chr5:79262170-79263442	chr5	78610027	652143	chr3:20432860-20434112	chr3	21001311	567199	chr18:37657220-37658485	chr18	38186022	527537
chr16:73363194-73364008	ENSG00000140836	73093597	269597	chr19:51533439-51534248	chr19	53739472	2205224	chr5:78922102-78922914	chr5	78610027	312075	chr3:20770259-20771070	chr3	21001311	230241	chr18:38007308-38008118	chr18	38186022	177904
chr5:103743603-103744282	ENSG00000112874	102898494	845109	chr9:108886163-108886835	chr9	105294901	3591262	chr3:6971488-6972174	chr3	7697470	725296	chr14:66066967-66067648	chr14	66749358	681710	chr7:105975947-105976623	chr7	105045004	930943
chr8:131531373-131531444	ENSG00000153317	131455906	75467	chr7:105031425-105031496	chr7	91990638	13040787	chr13:27527398-27527469	chr13	27430768	96630	chr9:71694800-71694871	chr9	71598463	96337	chr14:11261762-11261833	chr14	11327900	66067
chr16:73535545-73535655	ENSG00000140836	73093597	441948	chr19:51224007-51224117	chr19	53739472	2515355	chr5:79073636-79073746	chr5	78610027	463609	chr3:20619802-20619912	chr3	21001311	381399	chr18:37854969-37855079	chr18	38186022	330943
chr5:51009540-51009782	ENSG00000016082	50678921	330619	chr2:69611565-69611806	chr2	66884387	2727178	chr4:63335523-63335764	chr4	63648648	312884	chr21:19984453-19984693	chr21	20306385	321692	chr20:27360702-27360941	chr20	27755504	394563
chr3:62488037-62488651	ENSG00000153266	62359999	128038	chr15:19633633-19634262	chr15	16854938	2778695	chr20:28576060-28576673	chr20	28704683	128010	chr16:26568998-26569608	chr16	26692919	123311	chr22:38938150-38938760	chr22	39068358	129598
chr6:14266694-14266753	ENSG00000112149	14117872	148822	chr17:22775367-22775426	chr17	26364943	3589517	chr35:13628707-13628766	chr35	13489273	139434	chr20:13753182-13753241	chr20	13617586	135596	chr23:42214919-42214978	chr23	42354680	139702
chr3:90103172-90103224	ENSG00000044524	89156674	946498	chr13:1477962-1478014	chr11	-	-	chr33:1488791-1488843	chr33	785725	703066	chr26:841498-841550	chr26	1656872	815322	chr1:37633724-37633776	chr1	36715182	918542
chr8:67264260-67264395	ENSG00000179041	67341263	76868	chr2:124313251-124313390	chr5	-	-	chr29:15970971-15971102	chr29	16016154	45052	chr9:18889577-18889712	chr9	18816620	72957	chr14:32643483-32643618	chr14	32699359	55741
chr2:221016127-221016325	ENSG00000124006	220436581	579546	chr9:89539906-89540107	chr9	82469082	7070824	chr37:26567048-26567253	chr37	26079752	487296	chr6:9553395-9553592	chr6	9063215	490180	chr2:108800606-108800811	chr2	108226115	574491
chr5:117606333-117606596	ENSG00000169570	118324240	717644	chr18:43607646-43607914	chr14	-	-	chr11:7820650-7820914	chr11	8346507	525593	chr14:54658318-54658582	chr14	54153274	505044	chr7:36809012-36809276	chr7	36230534	578478
chr4:134328225-134328353	ENSG00000138650	134070470	257755	chr2:150916247-150916375	chr2	156481915	5565540	chr19:8512369-8512497	chr19	8732650	220153	chr2:96869290-96869418	chr2	97081807	212389	chr17:25249539-25249666	chr17	25495147	245481
chr7:36547458-36547543	ENSG00000164542	36429734	117724	chr17:57622925-57623011	chr8	-	-	chr14:47888497-47888582	chr14	47805350	83147	chr4:65973879-65973965	chr4	65866264	107615	chr4:61130562-61130647	chr4	61258800	128153
chr15:46052981-46053332	ENSG00000137767	45923346	129635	chr3:125266794-125267132	chr3	121456387	3810407	chr30:12086376-12086911	chr30	11977400	108976	chr1:143776883-143777235	chr1	143866407	89172	chr10:64944988-64945334	chr10	65071130	125796
chr13:76520244-76520416	ENSG00000136153	76194570	325674	chr15:90007569-90007735	chr15	87900117	2107452	chr22:29705890-29706061	chr22	29519369	186521	chr17:48991606-48991776	chr17	48815013	176593	chr12:51344412-51344583	chr12	51141637	202775
chr18:54058912-54058972	ENSG00000091157	54318574	259602	chr18:63615222-63615290	chr18	58326472	5288750	chr1:19366373-19366433	chr1	19157893	208480	chr8:73922563-73922623	chr8	74126513	203890	chr24:56234129-56234189	chr24	56467339	233150
chr2:221938509-221938589	ENSG00000116106	222438922	500333	chr9:90425405-90425484	chr9	83022498	7402907	chr37:27352204-27352284	chr37	27805314	453030	chr6:10346710-10346790	chr6	10795190	448400	chr2:109851168-109851248	chr2	110405363	554115
chr2:145925806-145926136	ENSG00000169554	145282147	643659	chr3:39107116-39107440	chr3	35196121	3910995	chr19:47174837-47175183	chr19	46550583	624254	chr18:28060730-28061060	chr18	27461817	598913	chr2:51545936-51546263	chr2	52274862	728599
chrX:131744561-131744633	ENSG00000076770	131623996	120565	chr10:92522672-92522744	chrX	-	-	chrX:103513273-103513345	chrX	103370674	142599	chrX:105430870-105430942	chrX	105256533	174337	chrX:16379723-16379795	chrX	16225696	154027
chr3:147858038-147858088	ENSG00000144891	148415571	557483	chr8:97500757-97500806	chr2	-	-	chr23:43135138-43135188	chr23	43613937	478749	chr16:81115456-81115506	chr16	81548815	433309	chr1:121060780-121060830	chr1	120445395	615385
chr9:104588928-104589131	ENSG00000198785	104500862	88066	chr5:72042538-72042742	chr5	69564696	2477842	chr11:58501849-58502052	chr11	58422278	79571	chr25:8134338-8134541	chr25	8054706	79632	chr8:93281251-93281455	chr8	93146121	135130
chr7:157653304-157653456	ENSG00000105993	157128075	525229	chr6:153826107-153826260	chr4	-	-	chr16:20121555-20121706	chr16	19806346	315209	chr4:108049621-108049773	chr4	107640852	408769	chr4:119736847-119736999	chr4	119431677	305170
chr7:42553423-42553492	ENSG00000106571	42277469	275954	chr17:53899589-53899657	chr17	50629477	3270112	chr18:7550880-7550949	chr18	7800858	249909	chr4:13622439-13622508	chr4	13366275	256164	chr4:79174374-79174443	chr4	79444274	269831
chr8:36560937-36561006	ENSG00000215262	36641842	80836	chr16:68113057-68113126	chr16	70663273	2550147	chr16:28530391-28530462	chr16	28478384	52007	chr27:8765296-8765365	chr27	8699565	65731	chr27:31802336-31802405	chr27	31849126	46721
chr4:134341062-134341188	ENSG00000138650	134070470	270592	chr2:150907580-150907706	chr2	156481915	5574209	chr19:8501189-8501315	chr19	8732650	231335	chr2:96858014-96858138	chr2	97081807	223669	chr17:25237124-25237245	chr17	25495147	257902
chr7:36568863-36568945	ENSG00000164542	36429734	139129	chr17:57588126-57588208	chr8	-	-	chr14:47908748-47908830	chr14	47805350	103398	chr4:65996780-65996862	chr4	65866264	130516	chr4:61103735-61103817	chr4	61258800	154983
chr4:150410216-150410374	ENSG00000170390	150999426	589052	chr19:46726733-46726891	chr2	-	-	chr15:47598717-47598875	chr15	48119273	520398	chr2:83772760-83772924	chr2	83278289	494471	chr17:8358983-8359141	chr17	7742116	616867
chr8:36386998-36387063	ENSG00000215262	36641842	254779	chr16:67922794-67922857	chr16	70663273	2740416	chr16:28685028-28685092	chr16	28478384	206644	chr27:8908178-8908242	chr27	8699565	208613	chr27:31640938-31641002	chr27	31849126	208124
chr2:220752017-220752111	ENSG00000124006	220436581	315436	chr9:89265602-89265696	chr9	82469082	6796520	chr37:26335613-26335707	chr37	26079752	255861	chr6:9315026-9315120	chr6	9063215	251811	chr2:108525022-108525116	chr2	108226115	298907
chr5:103819293-103819371	ENSG00000112874	102898494	920799	chr9:108813185-108813262	chr9	105294901	3518284	chr3:6924821-6924900	chr3	7697470	772570	chr14:66022944-66023023	chr14	66749358	726335	chr7:106036074-106036153	chr7	105045004	991070
chr5:102047498-102047581	ENSG00000145730	102089685	42104	chr9:104669854-104669940	chr9	110737325	6067385	chr3:8458837-8458920	chr3	8290489	168348	chr14:67514799-67514882	chr14	67474600	40199	chr7:104129917-104130000	chr7	104175550	45550
chr9:27385678-27385732	ENSG00000120160	27297137	88541	chr5:55057239-55057293	chr5	117826975	62769682	chr11:45512959-45513013	chr11	45431232	81727	chr23:45136703-45136757	chr23	45064606	72097	chr8:16894393-16894447	chr8	16979547	85100
chr9:7512516-7512704	ENSG00000178445	6645650	866866	chr5:95777804-95777989	chr1	-	-	chr11:28377717-28377903	chr11	27584474	793243	chr23:28555638-28555826	chr23	27814482	741156	chr8:37572032-37572220	chr8	38468512	896292
chr3:62527908-62528212	ENSG00000153266	62359999	167909	chr15:19596667-19596970	chr15	16854938	2741729	chr20:28535350-28535653	chr20	28704683	169030	chr16:26528880-26529183	chr16	26692919	163736	chr22:38897239-38897545	chr22	39068358	170813
chr8:20287947-20288198	ENSG00000061337	20161474	126473	chr15:57858395-57858646	chr16	-	-	chr25:36635991-36636242	chr25	36804789	168547	chr2:49510584-49510836	chr2	49368485	142099	chr8:68075026-68075278	chr8	67867782	207244
chr5:157910352-157910537	ENSG00000164330	158526769	616232	chr10:30212824-30213011	chr10	23523689	6689135	chr4:51952314-51952500	chr4	51378963	573351	chr14:20964223-20964406	chr14	20400279	563944	chr7:72174052-72174239	chr7	72804182	629943
chr14:54653479-54653842	ENSG00000100526	54863567	209725	chr15:24933175-24933536	chr15	27496685	2563149	chr8:30181038-30181401	chr8	30344957	163556	chr24:2569863-2570216	chr24	2726900	156684	chr10:66974330-66974693	chr10	67155090	180397
chr9:7172437-7172539	ENSG00000178445	6645650	526787	chr5:95057796-95057897	chr1	-	-	chr11:28099779-28099881	chr11	27584474	515305	chr23:28288745-28288847	chr23	27814482	474263	chr8:37985549-37985648	chr8	38468512	482864
chr12:99639791-99639845	ENSG00000180219	100041531	401686	chr7:31289507-31289560	chr13	-	-	chr15:38572181-38572235	chr15	38890120	317885	chr28:23585789-23585843	chr28	23899793	313950	chr5:63751328-63751382	chr5	64094901	343519
chr3:62452734-62452872	ENSG00000153266	62359999	92735	chr15:19667286-19667424	chr15	16854938	2812348	chr20:28610036-28610174	chr20	28704683	94509	chr16:26603741-26603879	chr16	26692919	89040	chr22:38973715-38973854	chr22	39068358	94504
chr13:76780262-76780559	ENSG00000136153	76194570	585692	chr15:90209570-90209878	chr15	87900117	2309453	chr22:29933422-29933723	chr22	29519369	414053	chr17:49189551-49189853	chr17	48815013	374538	chr12:51567515-51567815	chr12	51141637	425878
chr7:115145597-115145730	ENSG00000135272	114562209	583388	chr4:44164474-44164608	chr4	41790494	2373980	chr14:54582041-54582174	chr14	54063568	518473	chr4:72758972-72759105	chr4	72206834	552138	chr4:53251638-53251774	chr4	53854749	602975
chr9:104761993-104762190	ENSG00000198785	104500862	261131	chr5:71798075-71798268	chr5	69564696	2233379	chr11:58657914-58658111	chr11	58422278	235636	chr25:8273187-8273385	chr25	8054706	218481	chr8:93478475-93478671	chr8	93146121	332354
chr2:222510457-222510639	ENSG00000116106	222438922	71535	chr2:183392531-183392713	chr9	-	-	chr37:27879789-27879972	chr37	27809644	70145	chr6:10853783-10853967	chr6	10797060	56723	chr2:110486812-110486996	chr2	110407327	79485
chr3:62453783-62453936	ENSG00000153266	62359999	93784	chr15:19666055-19666211	chr15	16854938	2811117	chr20:28608968-28609118	chr20	28704683	95565	chr16:26602680-26602831	chr16	26692919	90088	chr22:38972696-38972848	chr22	39068358	95510
chr18:53940052-53940114	ENSG00000091157	54318574	378460	chr18:63739257-63739319	chr18	58326472	5412785	chr1:19478295-19478357	chr1	19157893	320402	chr8:73811388-73811450	chr8	74126513	315063	chr24:56113883-56113945	chr24	56467339	353394
chr1:81663333-81663796	ENSG00000117114	81771845	108049	chr2:273329907-273330364	chr2	277602151	4271787	chr6:66317446-66317915	chr6	66216074	101372	chr5:82186104-82186575	chr5	81707657	478447	chr3:63482413-63482956	chr3	63355165	127248
chr9:103492091-103492232	ENSG00000170681	103340361	151730	chr5:72890363-72890507	chr5	68926894	3963469	chr11:57562871-57563014	chr11	57453536	109335	chr25:7173709-7173851	chr25	7054711	118998	chr8:92072198-92072341	chr8	91916199	155999
chr6:163143498-163143694	ENSG00000112530	163148164	4470	chr1:52073500-52073695	chr1	49684130	2389370	chr1:51197322-51197518	chr1	51202126	4608	chr31:4225910-4226106	chr31	4229890	3784	chr9:99643836-99644032	chr9	99649000	4968
chr2:221758954-221759006	ENSG00000116106	222438922	679916	chr9:90263484-90263535	chr9	83022498	7240986	chr37:27188685-27188737	chr37	27805314	616577	chr6:10187913-10187965	chr6	10795190	607225	chr2:109630090-109630140	chr2	110405363	775223
chr6:104869118-104869226	ENSG00000085382	105307794	438568	chr19:61994619-61994727	chr20	-	-	chr12:61935041-61935149	chr12	62329980	394831	chr10:54878925-54879034	chr10	55242806	363772	chr9:46198763-46198876	chr9	45744424	454339
chr4:150415621-150415677	ENSG00000170390	150999426	583749	chr19:46730887-46730942	chr2	-	-	chr15:47602341-47602397	chr15	48119273	516876	chr2:83769196-83769252	chr2	83278289	490907	chr17:8354439-8354495	chr17	7742116	612323
chr4:23699389-23699613	ENSG00000109606	24586173	886560	chr14:63382964-63383188	chr14	61248770	2134194	chr3:86359435-86359668	chr3	85549939	809496	chr3:100955952-100956184	chr3	100177256	778696	chr6:44746702-44746931	chr6	45683587	936656
chr9:104904132-104904280	ENSG00000198785	104500862	403270	chr5:71631991-71632139	chr5	69564696	2067295	chr11:58732142-58732291	chr11	58422278	309864	chr25:8351747-8351898	chr25	8054706	297041	chr8:93580269-93580419	chr8	93146121	434148
chr14:54651958-54652336	ENSG00000100526	54863567	211231	chr15:24931620-24931998	chr15	27496685	2564687	chr8:30179519-30179905	chr8	30344957	165052	chr24:2568345-2568727	chr24	2726900	158173	chr10:66972828-66973212	chr10	67155090	181878
chr11:79542642-79542770	ENSG00000149256	79151992	390650	chr1:159657241-159657366	chr1	167398961	7741595	chr21:19138919-19139047	chr21	19502511	363464	chr7:64852895-64853024	chr7	65193196	340172	chr29:16215346-16215474	chr29	16642421	426947
chr18:52979163-52979335	ENSG00000166510	52626739	352424	chr18:64613312-64613484	chr18	67564699	2951215	chr1:20333176-20333348	chr1	20641290	307942	chr8:72979841-72980013	chr8	72654605	325236	chr24:55151368-55151540	chr24	54786447	364921
chr8:20745350-20745584	ENSG00000061337	20161474	583876	chr15:57275089-57275324	chr16	-	-	chr25:36225344-36225577	chr25	36804789	579212	chr2:49948594-49948828	chr2	49368485	580109	chr8:68626700-68626934	chr8	67867782	758918
chr8:20388409-20388656	ENSG00000061337	20161474	226935	chr15:57750383-57750628	chr16	-	-	chr25:36541175-36541420	chr25	36804789	263369	chr2:49602047-49602291	chr2	49368485	233562	chr8:68202835-68203082	chr8	67867782	335053
chr2:17404665-17404837	ENSG00000214842	17699706	294869	chr6:44242607-44242781	chr6	46895070	2652289	chr17:12743728-12743901	chr17	12998855	254954	chr15:77532435-77532609	chr15	77292419	240016	chr11:81468067-81468254	chr11	81239874	228193
chr2:16026493-16026587	ENSG00000134323	16080686	54099	chr6:46969328-46969424	chr6	51353994	4384570	chr17:11679263-11679357	chr17	11718464	39107	chr15:78629977-78630070	chr15	78588928	41049	chr11:82566639-82566729	chr11	82695073	128344
chr5:117633463-117633523	ENSG00000169570	118324240	690717	chr18:43642589-43642650	chr14	-	-	chr11:7835076-7835137	chr11	8346507	511370	chr14:54643063-54643123	chr14	54153274	489789	chr7:36786641-36786701	chr7	36230534	556107
chr5:51735815-51736170	ENSG00000213949	52083730	347560	chr2:66162698-66163074	chr2	71763917	5600843	chr4:62738211-62738566	chr4	62455624	282587	chr21:19418008-19418367	chr21	19153982	264026	chr20:26630990-26631361	chr20	26293313	337677
chr2:221258385-221258846	ENSG00000124006	220436581	821804	chr9:89772185-89772641	chr9	82469082	7303103	chr37:26764794-26765251	chr37	26079752	685042	chr6:9761750-9762205	chr6	9063215	698535	chr2:109075832-109076289	chr2	108226115	849717
chr6:39365053-39365107	ENSG00000095981	39290744	74309	chr9:12007102-12007157	chr15	-	-	chr12:8295129-8295183	chr12	8232029	63100	chr20:38919337-38919391	chr20	38853900	65437	chr23:13239196-13239250	chr23	13181359	57837
chr2:145836854-145837266	ENSG00000169554	145282147	554707	chr3:39003901-39004311	chr3	35196121	3807780	chr19:47080467-47080871	chr19	46550583	529884	chr18:27968722-27969134	chr18	27461817	506905	chr2:51656893-51657303	chr2	52274862	617559
chr2:145912387-145912663	ENSG00000169554	145282147	630240	chr3:39094192-39094464	chr3	35196121	3898071	chr19:47162240-47162516	chr19	46550583	611657	chr18:28046220-28046495	chr18	27461817	584403	chr2:51560047-51560320	chr2	52274862	714542
chr6:114383639-114383796	ENSG00000196591	114332472	51167	chr20:42273948-42274227	chr20	44827687	2553460	chr12:70147733-70147889	chr12	70072758	74975	chr10:63044950-63045105	chr10	62976771	68179	chr9:36838937-36839090	chr9	36918295	79205
chr3:62498853-62499212	ENSG00000153266	62359999	138854	chr15:19623471-19623831	chr15	16854938	2768533	chr20:28567044-28567402	chr20	28704683	137281	chr16:26559226-26559584	chr16	26692919	133335	chr22:38927985-38928342	chr22	39068358	140016
chr1:81692210-81692548	ENSG00000117114	81771845	79297	chr2:273309134-273309484	chr2	277602151	4292667	chr6:66288800-66289151	chr6	66216074	72726	chr5:82156337-82156688	chr5	81707657	448680	chr3:63451997-63452348	chr3	63355165	96832
chr3:62468727-62468963	ENSG00000153266	62359999	108728	chr15:19650354-19650582	chr15	16854938	2795416	chr20:28593761-28593994	chr20	28704683	110689	chr16:26586956-26587192	chr16	26692919	105727	chr22:38955514-38955750	chr22	39068358	112608
chr16:73693715-73694283	ENSG00000140836	73093597	600118	chr19:51083018-51083600	chr19	53739472	2655872	chr5:79219337-79219903	chr5	78610027	609310	chr3:20478539-20479105	chr3	21001311	522206	chr18:37704894-37705459	chr18	38186022	480563
chr8:131998340-131998403	ENSG00000153317	131455906	542434	chr7:105482758-105482821	chr7	91990638	13492120	chr13:27879302-27879364	chr13	27430768	448534	chr9:72049934-72049997	chr9	71598463	451471	chr14:10870100-10870163	chr14	11327900	457737
chr3:153563466-153563553	ENSG00000114790	153838792	275239	chr2:171898341-171898424	chr2	46226740	125671601	chr23:48062155-48062241	chr23	48290113	227872	chr16:85775643-85775730	chr16	85972751	197021	chr1:114714332-114714422	chr1	114432073	282259
chr4:142975495-142975619	ENSG00000164136	142557752	417743	chr19:40530735-40530859	chr19	34544021	5986714	chr19:1169358-1169482	chr19	1352457	182975	chr2:89712323-89712447	chr2	89935123	222676	chr17:16086917-16087041	chr17	16363886	276845
chr7:42562019-42562316	ENSG00000106571	42277469	284550	chr17:53874704-53875000	chr17	50629477	3245227	chr18:7541478-7541776	chr18	7800858	259082	chr4:13630837-13631134	chr4	13366275	264562	chr4:79154780-79155077	chr4	79444274	289197
chr3:62461108-62461259	ENSG00000153266	62359999	101109	chr15:19658975-19659127	chr15	16854938	2804037	chr20:28601627-28601778	chr20	28704683	102905	chr16:26594734-26594885	chr16	26692919	98034	chr22:38963352-38963504	chr22	39068358	104854
chr2:140289783-140289880	ENSG00000144227	139537918	751865	chr3:29543371-29543466	chr3	68828	29474543	chr19:42062410-42062505	chr19	41318893	743517	chr18:22931496-22931593	chr18	22271482	660014	chr2:57728499-57728594	chr2	58582460	853866
chr2:221026190-221026426	ENSG00000124006	220436581	589609	chr9:89547562-89547800	chr9	82469082	7078480	chr37:26574252-26574503	chr37	26079752	494500	chr6:9559900-9560137	chr6	9063215	496685	chr2:108809310-108810356	chr2	108226115	583195
chr7:113130740-113130824	ENSG00000164604	112727833	402907	chr4:40360830-40360914	chr4	43719803	3358889	chr14:52907559-52907643	chr14	52573892	333667	chr4:71088731-71088815	chr4	70763801	324930	chr4:55235798-55235882	chr4	55640695	404813
chr4:46948972-46949506	ENSG00000170516	46911252	37720	chr14:39014865-39015459	chr10	-	-	chr13:42914622-42915158	chr13	42740224	174398	chr3:81830496-81831030	chr3	81994410	163380	chr6:67169446-67169982	chr6	67118236	51210
chr2:59378899-59379252	ENSG00000115392	58468507	910392	chr14:105768264-105768606	chr14	110369224	4600618	chr10:59428133-59428480	chr10	58632368	795765	chr15:41764987-41765336	chr15	42591277	825941	chr11:41723396-41723749	chr11	40744419	978977
chr5:157973424-157973507	ENSG00000164330	158526769	553262	chr10:30136078-30136165	chr10	23523689	6612389	chr4:51893887-51893970	chr4	51378963	514924	chr14:20905492-20905575	chr14	20400279	505213	chr7:72242294-72242378	chr7	72804182	561804
chrX:23059211-23059460	ENSG00000184735	23018087	41124	chrX:42367913-42368158	chr8	-	-	chrX:18812688-18812931	chrX	18776371	36317	chrX:17389821-17390073	chrX	17345727	44094	chrX:127267703-127267950	chrX	127364927	96977
chr5:103828143-103828204	ENSG00000112874	102898494	929649	chr9:108808784-108808845	chr9	105294901	3513883	chr3:6918315-6918375	chr3	7697470	779095	chr14:66018143-66018204	chr14	66749358	731154	chr7:106044614-106044675	chr7	105045004	999610
chr5:102710321-102710515	ENSG00000181751	102594403	115918	chr9:105065664-105065859	chr9	110878884	5813025	chr3:7870656-7870850	chr3	7967907	97057	chr14:66919509-66919703	chr14	67030817	111114	chr7:104825420-104825612	chr7	104692816	132604
chr2:140132449-140132714	ENSG00000144227	139537918	594531	chr3:29242291-29242545	chr3	68828	29173463	chr19:41927861-41928123	chr19	41318893	608968	chr18:22790729-22790989	chr18	22271482	519247	chr2:57929679-57929941	chr2	58582460	652519
chr3:177568536-177568905	ENSG00000197584	177990720	421815	chr2:126352860-126353216	chr2	137954821	11601605	chr34:41222181-41222534	chr34	41963562	741028	chr19:17260150-17260508	chr19	17863925	603417	chr1:89788017-89788376	chr1	89080346	707671
chr2:59300545-59301112	ENSG00000115392	58468507	832038	chr14:105839112-105839683	chr14	110369224	4529541	chr10:59374138-59374712	chr10	58632368	741770	chr15:41819373-41819946	chr15	42591277	771331	chr11:41666131-41666706	chr11	40744419	921712
chr12:67429129-67429187	ENSG00000155974	67197966	231163	chr7:62404306-62404364	chr7	64890312	2485948	chr10:9424484-9424542	chr10	9063901	360583	chr6:82383914-82383971	chr6	82051586	332328	chr5:46983784-46983842	chr5	47393104	409262
chr5:106150426-106150743	ENSG00000184349	107006596	855853	chr9:106694066-106694383	chr9	109897850	3203467	chr3:5102297-5102612	chr3	4272185	830112	chr14:64206687-64207002	chr14	63631090	575597	chr7:108364394-108364711	chr7	109097540	732829
chr8:64206048-64206098	ENSG00000185728	64081112	124936	chr3:133609767-133609817	chr2	-	-	chr29:13354090-13354140	chr29	13240349	113741	chr9:21498950-21499000	chr9	21612894	113894	chr14:29917259-29917309	chr14	29830727	86532
chrX:23145666-23145881	ENSG00000184735	23018087	127579	chrX:42488541-42488756	chr8	-	-	chrX:18904341-18904556	chrX	18776371	127970	chrX:17516420-17516635	chrX	17468947	47473	chrX:127126161-127126384	chrX	127364927	238543
chr9:22775637-22775762	ENSG00000176399	22446840	328797	chr5:114387941-114388062	chr5	112243551	2144390	chr11:41814199-41814323	chr11	41566167	248032	chr23:41581092-41581217	chr23	41325540	255552	chr8:21455705-21455830	chr8	21768203	312373
chr18:53969419-53969623	ENSG00000091157	54318574	348951	chr18:63709695-63709899	chr18	58326472	5383223	chr1:19451347-19451552	chr1	19157893	293454	chr8:73837271-73837476	chr8	74126513	289037	chr24:56151284-56151488	chr24	56467339	315851
chr7:42806444-42806707	ENSG00000136197	42951904	145197	chr17:53502298-53502560	chr17	50782041	2720257	chr18:7305885-7306148	chr18	7233303	72582	chr4:13855172-13855436	chr4	13919887	64451	chr4:78893603-78893868	chr4	78839309	54294
chr18:53966392-53966673	ENSG00000091157	54318574	351901	chr18:63712854-63713138	chr18	58326472	5386382	chr1:19454593-19454874	chr1	19157893	296700	chr8:73834282-73834563	chr8	74126513	291950	chr24:56146400-56146689	chr24	56467339	320650
chr4:130853752-130853812	ENSG00000151466	130014764	838988	chr2:153281362-153281420	chr2	148271696	5009666	chr19:11195233-11195293	chr19	12001306	806013	chr2:99465954-99466014	chr2	100183877	717863	chr17:28153897-28153957	chr17	29126352	972395
chr4:176464215-176464277	ENSG00000150625	176923815	459538	chr2:204120714-204120778	chr16	-	-	chr16:53876842-53876902	chr16	53834982	41860	chr27:32903950-32904012	chr27	32821165	82785	chr27:5401094-5401156	chr27	6314046	912890
chr2:140446674-140446996	ENSG00000144227	139537918	908756	chr3:29684822-29685143	chr3	68828	29615994	chr19:42146299-42146620	chr19	41318893	827406	chr18:23013425-23013748	chr18	22271482	741943	chr2:57617429-57617745	chr2	58582460	964715
chr3:62498543-62498826	ENSG00000153266	62359999	138544	chr15:19623856-19624140	chr15	16854938	2768918	chr20:28567429-28567713	chr20	28704683	136970	chr16:26559611-26559895	chr16	26692919	133024	chr22:38928368-38928653	chr22	39068358	139705
chr2:59339230-59339538	ENSG00000115392	58468507	870723	chr14:105804384-105804723	chr14	110369224	4564501	chr10:59404021-59404331	chr10	58632368	771653	chr15:41791501-41791809	chr15	42591277	799468	chr11:41694172-41694485	chr11	40744419	949753
chr5:106157097-106157152	ENSG00000184349	107006596	849444	chr9:106686580-106686634	chr9	109897850	3211216	chr3:5098134-5098188	chr3	4272185	825949	chr14:64197348-64197402	chr14	63631090	566258	chr7:108373198-108373259	chr7	109097540	724281
chr4:150296253-150296483	ENSG00000170390	150999426	702943	chr19:46605771-46605997	chr2	-	-	chr15:47505254-47505480	chr15	48119273	613793	chr2:83870805-83871034	chr2	83278289	592516	chr17:8478274-8478504	chr17	7742116	736158
chr6:104920678-104920779	ENSG00000085382	105307794	387015	chr19:62050608-62050706	chr20	-	-	chr12:61982939-61983039	chr12	62329980	346941	chr10:54925353-54925454	chr10	55242806	317352	chr9:46118988-46119089	chr9	45744424	374564
chr1:166387883-166388171	ENSG00000188859	166136206	251677	chr13:89780495-89780776	chr13	101283804	11503028	chr38:17125676-17125965	chr38	17292326	166361	chr5:31351039-31351330	chr5	31607112	255782	chr3:2530868-2531154	chr3	2774510	243356
chrX:29780418-29780629	ENSG00000099399	30233677	453048	chr13:58436413-58436623	chrX	-	-	chrX:24876655-24876866	chrX	25321140	444274	chrX:23169686-23169895	chrX	23597619	427724	chrX:119906494-119906706	chrX	119374584	531910
chr9:83052219-83052363	ENSG00000106829	82186688	865531	chr5:91008047-91008191	chr1	-	-	chr1:78515203-78515346	chr1	79269883	754537	chr23:11583097-11583240	chr23	12316041	732801	chr8:56628485-56628627	chr8	55837380	791105
chr3:90103716-90103768	ENSG00000044524	89156674	947042	chr13:1477370-1477422	chr11	-	-	chr33:1489319-1489371	chr33	785725	703594	chr26:840955-841007	chr26	1656872	815865	chr1:37634262-37634313	chr1	36715182	919080
chr2:84390506-84390693	ENSG00000163541	84687169	296476	chr4:168516090-168516273	chr4	165937928	2578162	chr17:40608452-40608642	chr17	40393146	215306	chr15:20081529-20081717	chr15	19834367	247162	chr11:50735803-50735991	chr11	50400444	335359
chr2:15949116-15949367	ENSG00000134323	16080686	131319	chr6:47033108-47033359	chr6	51353994	4320635	chr17:11621467-11621716	chr17	11718464	96748	chr15:78687900-78688151	chr15	78588928	98972	chr11:82628984-82629235	chr11	82695073	65838
chr13:76791012-76791125	ENSG00000136153	76194570	596442	chr15:90203915-90204027	chr15	87900117	2303798	chr22:29941187-29941300	chr22	29519369	421818	chr17:49197499-49197612	chr17	48815013	382486	chr12:51576854-51576967	chr12	51141637	435217
chr8:20631951-20632077	ENSG00000061337	20161474	470477	chr15:57412092-57412218	chr16	-	-	chr25:36338583-36338709	chr25	36804789	466080	chr2:49816583-49816709	chr2	49368485	448098	chr8:68489318-68489444	chr8	67867782	621536
chr10:121145870-121145943	ENSG00000148908	121302220	156277	chr1:289738849-289738922	chr1	206870538	82868311	chr28:29574942-29575015	chr28	29700815	125800	chr1:13100678-13100751	chr1	12970870	129808	chr26:39868045-39868118	chr26	40010628	142510
chr15:46052223-46052831	ENSG00000137767	45923346	128877	chr3:125266042-125266645	chr3	121456387	3809655	chr30:12085625-12086236	chr30	11977400	108225	chr1:143777375-143777983	chr1	143866407	88424	chr10:64945475-64946080	chr10	65071130	125050
chr7:115098137-115098819	ENSG00000135272	114562209	535928	chr4:44114805-44115487	chr4	41790494	2324311	chr14:54535568-54536251	chr14	54063568	472000	chr4:72715284-72715962	chr4	72206834	508450	chr4:53301103-53301782	chr4	53854749	552967
chr5:117776019-117776207	ENSG00000169570	118324240	548033	chr18:42925039-42925227	chr14	-	-	chr11:7942277-7942464	chr11	8346507	404043	chr14:54538336-54538522	chr14	54153274	385062	chr7:36646741-36646937	chr7	36230534	416207
chr1:81732733-81732800	ENSG00000117114	81771845	39045	chr2:273263686-273263763	chr2	277602151	4338388	chr6:66258170-66258237	chr6	66216074	42096	chr5:82124016-82124083	chr5	81707657	416359	chr3:63413291-63413358	chr3	63355165	58126
chr16:51037291-51037358	ENSG00000103449	51185278	147920	chr19:30115526-30115592	chr19	34379537	4263945	chr2:64379022-64379088	chr2	64245467	133555	chr3:3863515-3863582	chr3	3978895	115313	chr18:19507199-19507265	chr18	19653740	146475
chr5:98705983-98706047	ENSG00000153922	98262240	443743	chr9:101417371-101417435	chr1	-	-	chr3:10928210-10928276	chr3	11288970	360694	chr14:70126441-70126505	chr14	70498333	371828	chr7:101080228-101080292	chr7	100565742	514486
chr2:59292554-59292664	ENSG00000115392	58468507	824047	chr14:105844293-105844404	chr14	110369224	4524820	chr10:59368685-59368796	chr10	58632368	736317	chr15:41824712-41824823	chr15	42591277	766454	chr11:41660342-41660452	chr11	40744419	915923
chr2:51813622-51813796	ENSG00000179915	51259674	553948	chr6:27493347-27493524	chr6	25149152	2344195	chr10:53047850-53048029	chr10	52670843	377007	chr15:48084877-48085054	chr15	48567697	482643	chr11:34194310-34194486	chr11	33353304	841006
chr7:113144339-113144393	ENSG00000164604	112727833	416506	chr4:40375887-40375941	chr4	43719803	3343862	chr14:52915688-52915742	chr14	52573892	341796	chr4:71096213-71096267	chr4	70763801	332412	chr4:55226896-55226950	chr4	55640695	413745
chr2:184092662-184092827	ENSG00000163002	183982241	110421	chr4:21963681-21963846	chr3	-	-	chr36:26217105-26217263	chr36	26137763	79342	chr18:60747049-60747215	chr18	60647621	99428	chr2:13384319-13384484	chr2	13487161	102677
chr1:154285451-154285566	ENSG00000143595	154293566	8000	chr5:61957398-61957511	chr2	-	-	chr7:42963231-42963346	chr7	42963987	641	chr5:43424413-43424528	chr5	43425076	548	chr3:16294044-16294159	chr3	16294622	463
chr5:50783866-50784202	ENSG00000016082	50678921	104945	chr2:69843266-69843600	chr2	66884387	2958879	chr4:63533267-63533601	chr4	63648648	115047	chr21:20196223-20196557	chr21	20306385	109828	chr20:27616538-27616871	chr20	27755504	138633
chr18:54075479-54075998	ENSG00000091157	54318574	242576	chr18:63600235-63600752	chr18	58326472	5273763	chr1:19352165-19352684	chr1	19157893	194272	chr8:73936350-73936864	chr8	74126513	189649	chr24:56251861-56252376	chr24	56467339	214963
chr3:110560086-110560162	ENSG00000177707	110788918	228756	chr11:60055232-60055308	chr11	62144557	2089249	chr33:15691748-15691824	chr33	15871172	179348	chr19:46543460-46543536	chr19	46336940	206520	chr1:56100415-56100491	chr1	56308185	207694
chr3:191471104-191471170	ENSG00000152492	191046866	424238	chr11:79633086-79633152	chr11	83920149	4286997	chr34:23540911-23540977	chr34	23167476	373435	chr19:29028291-29028357	chr19	28671724	356567	chr1:76203288-76203355	chr1	76624452	421097
chr16:51030750-51030859	ENSG00000103449	51185278	154419	chr19:30119787-30119894	chr19	34379537	4259643	chr2:64384331-64384449	chr2	64245467	138864	chr3:3858954-3859072	chr3	3978895	119823	chr18:19502533-19502651	chr18	19653740	151089
chr8:131723905-131723991	ENSG00000153317	131455906	267999	chr7:105252610-105252695	chr7	91990638	13261972	chr13:27694371-27694457	chr13	27430768	263603	chr9:71856505-71856590	chr9	71598463	258042	chr14:11091223-11091309	chr14	11327900	236591
chr14:69524344-69524406	ENSG00000072110	69446157	78187	chr6:111698269-111698330	chr6	116149471	4451141	chr8:42887488-42887549	chr8	42808276	79212	chr24:15164604-15164665	chr24	15086582	78022	chr10:81198490-81198550	chr10	81121656	76834
chr16:73424428-73424629	ENSG00000140836	73093597	330831	chr19:51587000-51587200	chr19	53739472	2152272	chr5:78978078-78978280	chr5	78610027	368051	chr3:20714401-20714602	chr3	21001311	286709	chr18:37949879-37950080	chr18	38186022	235942
chr5:109691146-109691366	ENSG00000164209	110073837	382471	chr9:112461042-112461260	chr18	-	-	chr3:2007349-2007569	chr3	1719781	287568	chr14:61142566-61142786	chr14	60895084	247482	chr7:111965363-111965582	chr7	112332867	367285
chr16:73764864-73765541	ENSG00000140836	73093597	671267	chr19:51027692-51028427	chr19	53739472	2711045	chr5:79278780-79279454	chr5	78610027	668753	chr3:20418381-20419052	chr3	21001311	582259	chr18:37643798-37644472	chr18	38186022	541550
chr5:50918089-50918706	ENSG00000016082	50678921	239168	chr2:69694464-69695121	chr2	66884387	2810077	chr4:63413295-63413924	chr4	63648648	234724	chr21:20063529-20064155	chr21	20306385	242230	chr20:27456909-27457535	chr20	27755504	297969
chr3:177723942-177724291	ENSG00000197584	177990720	266429	chr2:126182446-126182791	chr2	137954821	11772030	chr34:41324133-41324485	chr34	41963562	639077	chr19:17394425-17394776	chr19	17863925	469149	chr1:89608513-89608857	chr1	89080346	528167
chr18:54045820-54046097	ENSG00000091157	54318574	272477	chr18:63631240-63631521	chr18	58326472	5304768	chr1:19377847-19378129	chr1	19157893	219954	chr8:73911443-73911725	chr8	74126513	214788	chr24:56220994-56221275	chr24	56467339	246064
chr8:20656995-20657289	ENSG00000061337	20161474	495521	chr15:57382201-57382491	chr16	-	-	chr25:36307992-36308285	chr25	36804789	496504	chr2:49859388-49859682	chr2	49368485	490903	chr8:68520340-68520634	chr8	67867782	652558
chr2:67894477-67894621	ENSG00000143971	67624451	270026	chr14:99680616-99680758	chr14	102047669	2366911	chr10:66859107-66859250	chr10	66631403	227704	chr15:34441827-34441969	chr15	34678370	236401	chr11:66088499-66088640	chr11	65813352	275147
chr2:59201034-59201109	ENSG00000115392	58468507	732527	chr14:105927672-105927745	chr14	110369224	4441479	chr10:59282765-59282840	chr10	58632368	650397	chr15:41910140-41910215	chr15	42591277	681062	chr11:41543258-41543333	chr11	40744419	798839
chr5:50855216-50855866	ENSG00000016082	50678921	176295	chr2:69769217-69769881	chr2	66884387	2884830	chr4:63477857-63478513	chr4	63648648	170135	chr21:20123383-20124024	chr21	20306385	182361	chr20:27536486-27537137	chr20	27755504	218367
chr3:177556402-177556482	ENSG00000197584	177990720	434238	chr2:126385001-126385251	chr2	137954821	11569570	chr34:41209512-41209592	chr34	41963562	753970	chr19:17247399-17247479	chr19	17863925	616446	chr1:89811661-89811742	chr1	89080346	731315
chr1:81691069-81691308	ENSG00000117114	81771845	80537	chr2:273310342-273310580	chr2	277602151	4291571	chr6:66290102-66290340	chr6	66216074	74028	chr5:82157574-82157814	chr5	81707657	449917	chr3:63453225-63453462	chr3	63355165	98060
chr6:14593580-14593766	ENSG00000112149	14117872	475708	chr17:23039385-23039570	chr17	26364943	3325373	chr35:13910599-13910784	chr35	13489273	421326	chr20:14055490-14055674	chr20	13617586	437904	chr23:41947847-41948029	chr23	42354680	406651
chr9:83113032-83113295	ENSG00000106829	82186688	926344	chr5:91077166-91077421	chr1	-	-	chr1:78557831-78558094	chr1	79269883	711789	chr23:11525341-11525604	chr23	12316041	790437	chr8:56694879-56695142	chr8	55837380	857499
chr5:117775837-117775996	ENSG00000169570	118324240	548244	chr18:42924859-42925016	chr14	-	-	chr11:7942099-7942258	chr11	8346507	404249	chr14:54538542-54538701	chr14	54153274	385268	chr7:36646957-36647115	chr7	36230534	416423
chr6:14560209-14560443	ENSG00000112149	14117872	442337	chr17:23010579-23010816	chr17	26364943	3354127	chr35:13884846-13885080	chr35	13489273	395573	chr20:14018470-14018702	chr20	13617586	400884	chr23:41974764-41974995	chr23	42354680	379685
chr5:158016916-158017199	ENSG00000164330	158526769	509570	chr10:30103683-30103957	chr10	23523689	6579994	chr4:51862863-51863138	chr4	51378963	483900	chr14:20874480-20874757	chr14	20400279	474201	chr7:72284250-72284531	chr7	72804182	519651
chr10:87186449-87186585	ENSG00000199104	88024545	837960	chr16:12791528-12791665	chr16	9574932	3216596	chr4:33379416-33379555	chr4	34073429	693874	chr1:84828634-84828770	chr1	84117509	711125	chr28:40548970-40549106	chr28	41329149	780043
chr2:145961193-145961255	ENSG00000169554	145282147	679046	chr3:39137760-39137821	chr3	35196121	3941639	chr19:47206896-47206959	chr19	46550583	656313	chr18:28091278-28091340	chr18	27461817	629461	chr2:51506450-51506512	chr2	52274862	768350
chr13:23250761-23250823	ENSG00000102683	23755091	504268	chr15:43235748-43235810	chr15	45385876	2150066	chr25:15785499-15785561	chr25	15403190	382309	chr17:3333754-3333816	chr17	3857467	523651	chr12:35094763-35094825	chr12	34954970	139793
chr8:60147484-60147934	ENSG00000198846	60031767	115717	chr7:68462329-68462783	chr5	-	-	chr29:9950308-9950755	chr29	9841835	108473	chr9:24930650-24931102	chr9	25191271	260169	chr14:27016364-27016811	chr14	26941849	74515
chr14:82284738-82284909	ENSG00000071537	82000205	284533	chr6:122841937-122842103	chr6	124868197	2026094	chr8:54074405-54074576	chr8	53824395	250010	chr24:26530551-26530722	chr24	26268415	262136	chr10:94312971-94313141	chr10	93965154	347817
chr2:119832748-119833013	ENSG00000144119	119916465	83452	chr16:84498137-84498400	chr13	-	-	chr19:30945103-30945368	chr19	30862601	82502	chr18:12031376-12031640	chr18	11951832	79544	chr2:71199089-71199353	chr2	71285350	85997
chr5:43896105-43896289	ENSG00000112992	43602794	293311	chr2:67651867-67652054	chr2	70640042	2987988	chr4:66195153-66195338	chr4	66437890	242552	chr21:22855804-22855983	chr21	23086192	230209	chr20:30976237-30976422	chr20	31258005	281583
chr7:42644695-42644792	ENSG00000136197	42951904	307112	chr17:53823871-53823969	chr17	50782041	3041830	chr18:7469651-7469748	chr18	7233303	236348	chr4:13686750-13686847	chr4	13919887	233040	chr4:79084197-79084295	chr4	78839309	244888
chr2:220945340-220945616	ENSG00000124006	220436581	508759	chr9:89475257-89475536	chr9	82469082	7006175	chr37:26505373-26505649	chr37	26079752	425621	chr6:9489992-9490259	chr6	9063215	426777	chr2:108734023-108734299	chr2	108226115	507908
chr9:104010897-104011034	ENSG00000136881	104145801	134767	chr5:72376645-72376787	chr5	69268710	3107935	chr11:58010297-58010434	chr11	58109368	98934	chr25:7599442-7599579	chr25	7704932	105353	chr8:92599940-92600077	chr8	92724710	124633
chr12:51055207-51055445	ENSG00000123268	51157493	102048	chrX:116312983-116313213	chr7	-	-	chr27:4082910-4083149	chr27	3992904	90006	chr6:68164119-68164357	chr6	68255415	91058	chr5:29425039-29425275	chr5	29336696	88343
chrX:136145189-136145452	ENSG00000147274	135962923	182266	chrX:140387727-140387990	chrX	154518145	14130155	chrX:107340548-107340814	chrX	107182418	158130	chrX:109038069-109038334	chrX	108889708	148361	chrX:20629693-20629958	chrX	20462823	166870
chr8:109244881-109245378	ENSG00000147655	109095913	148968	chr13:105124001-105124495	chr7	-	-	chr13:8875613-8876108	chr13	8755562	120051	chr9:52738898-52739395	chr9	52627087	111811	chr14:58411599-58412097	chr14	58536011	123914
chr5:80761751-80761806	ENSG00000172497	80689998	71753	chr2:20541400-20541455	chr2	48096572	27555117	chr3:25859077-25859132	chr3	25928390	69258	chr14:84564732-84564787	chr14	84654451	89664	chr7:83751395-83751450	chr7	83658727	92668
chr4:150213931-150214078	ENSG00000170390	150999426	785348	chr19:46516612-46516759	chr2	-	-	chr15:47439138-47439286	chr15	48119273	679987	chr2:83933357-83933503	chr2	83278289	655068	chr17:8563448-8563595	chr17	7742116	821332
chr18:53980208-53980547	ENSG00000091157	54318574	338027	chr18:63697233-63697578	chr18	58326472	5370761	chr1:19436311-19436650	chr1	19157893	278418	chr8:73850856-73851195	chr8	74126513	275318	chr24:56162126-56162462	chr24	56467339	304877
chr2:221862532-221862592	ENSG00000116106	222438922	576330	chr9:90355131-90355192	chr9	83022498	7332633	chr37:27287704-27287764	chr37	27805314	517550	chr6:10289039-10289099	chr6	10795190	506091	chr2:109772703-109772763	chr2	110405363	632600
chr18:54168152-54168809	ENSG00000091157	54318574	149765	chr18:63517036-63517697	chr18	58326472	5190564	chr1:19274435-19275091	chr1	19157893	116542	chr8:74005999-74006655	chr8	74126513	119858	chr24:56337059-56337707	chr24	56467339	129632
chr3:147810680-147810861	ENSG00000144891	148415571	604710	chr8:97559271-97559450	chr2	-	-	chr23:43102758-43102939	chr23	43613937	510998	chr16:81071501-81071682	chr16	81548815	477133	chr1:121127297-121127478	chr1	120445395	681902
chr2:138498942-138499012	ENSG00000150540	138721590	222578	chr13:52049599-52049669	chr3	-	-	chr19:40403541-40403611	chr19	40656232	252621	chr18:21327185-21327255	chr18	21516160	188905	chr2:59662688-59662758	chr2	59417441	245247
chr5:117862935-117863078	ENSG00000169570	118324240	461162	chr18:43040085-43040224	chr14	-	-	chr11:8017228-8017364	chr11	8346507	329143	chr14:54464039-54464182	chr14	54153274	310765	chr7:36563608-36563751	chr7	36230534	333074
chr7:114989693-114989995	ENSG00000135272	114562209	427484	chr4:43987762-43988065	chr4	41790494	2197268	chr14:54446605-54446917	chr14	54063568	383037	chr4:72611008-72611320	chr4	72206834	404174	chr4:53396547-53396860	chr4	53854749	457889
chr5:157941164-157941559	ENSG00000164330	158526769	585210	chr10:30171522-30171924	chr10	23523689	6647833	chr4:51922596-51923011	chr4	51378963	543633	chr14:20933996-20934394	chr14	20400279	533717	chr7:72204931-72205361	chr7	72804182	598821
chr18:58677764-58677876	ENSG00000101542	59000815	322939	chr17:5823888-5823999	chr13	-	-	chr1:15658969-15659081	chr1	15234880	424089	chr8:77667232-77667344	chr8	77933225	265881	chr24:60107079-60107186	chr24	60532272	425086
chr16:13774427-13774635	ENSG00000175595	14014014	239379	chr3:98756246-98756459	chr10	-	-	chr6:29451992-29452203	chr6	29226896	225096	chr13:31245668-31245881	chr13	31024646	221022	chr25:12541820-12542030	chr25	12923472	381442
chr8:36209807-36209898	ENSG00000215262	36641842	431944	chr16:67693664-67693757	chr16	70663273	2969516	chr16:28825481-28825572	chr16	28478384	347097	chr27:9044514-9044605	chr27	8699565	344949	chr27:31496065-31496155	chr27	31849126	352971
chr2:221011755-221012525	ENSG00000124006	220436581	575174	chr9:89534543-89535308	chr9	82469082	7065461	chr37:26563311-26564082	chr37	26079752	483559	chr6:9548992-9549767	chr6	9063215	485777	chr2:108795241-108796025	chr2	108226115	569126
chrX:22958106-22958206	ENSG00000184735	23018087	59881	chrX:42167772-42167869	chr8	-	-	chrX:18715182-18715282	chrX	18776371	61089	chrX:17292187-17292287	chrX	17345722	53435	chrX:127446552-127446652	chrX	127364927	81625
chr9:22755020-22755086	ENSG00000176399	22446840	308180	chr5:114404764-114404830	chr5	112243551	2161213	chr11:41805014-41805082	chr11	41566167	238847	chr23:41570611-41570678	chr23	41325540	245071	chr8:21471455-21471521	chr8	21768203	296682
chr4:45103165-45103348	ENSG00000163281	44728612	374553	chr14:40659126-40659309	chr14	62736435	22077126	chr13:41503034-41503217	chr13	41228560	274474	chr3:83248467-83248650	chr3	83528289	279639	chr6:65341251-65341429	chr6	64992219	349032
chr4:150495712-150496353	ENSG00000170390	150999426	503073	chr19:46812176-46812808	chr2	-	-	chr15:47684196-47684836	chr15	48119273	434437	chr2:83680377-83681019	chr2	83278289	402088	chr17:8264176-8264816	chr17	7742116	522060
chr6:14305979-14306385	ENSG00000112149	14117872	188107	chr17:22806466-22806853	chr17	26364943	3558090	chr35:13656232-13656636	chr35	13489273	166959	chr20:13781895-13782298	chr20	13617586	164309	chr23:42189856-42190267	chr23	42354680	164413
chrX:23010509-23010689	ENSG00000184735	23018087	7398	chrX:42285401-42285575	chr8	-	-	chrX:18770041-18770222	chrX	18776371	6149	chrX:17344346-17344527	chrX	17345722	1195	chrX:127373882-127374055	chrX	127364927	8955
chr5:103791553-103791709	ENSG00000112874	102898494	893059	chr9:108829128-108829282	chr9	105294901	3534227	chr3:6937544-6937700	chr3	7697470	759770	chr14:66033544-66033700	chr14	66749358	715658	chr7:106024262-106024417	chr7	105045004	979258
chr2:84107101-84107154	ENSG00000163541	84687169	580015	chr4:168969768-168969821	chr4	165937928	3031840	chr17:40838727-40838780	chr17	40393146	445581	chr15:20334770-20334823	chr15	19834367	500403	chr11:51132246-51132299	chr11	50400444	731802
chr2:119832529-119832722	ENSG00000144119	119916465	83743	chr16:84498426-84498619	chr13	-	-	chr19:30945394-30945587	chr19	30862601	82793	chr18:12031656-12031849	chr18	11951832	79824	chr2:71198870-71199063	chr2	71285350	86287
chr3:16497607-16497659	ENSG00000154814	16306706	190901	chr9:11746341-11746393	chr16	-	-	chr23:26331063-26331115	chr23	26516070	184955	chr16:65137604-65137656	chr16	65326619	188963	chr1:155237724-155237776	chr1	155020422	217302
chr5:85937480-85937604	ENSG00000145715	86563705	626101	chr2:370243-370370	chr2	13551335	13180965	chr3:21673994-21674123	chr3	21176910	497084	chr14:80350243-80350370	chr14	79903058	447185	chr7:88680843-88680970	chr7	89281001	600031
chr7:115166414-115166750	ENSG00000135272	114562209	604205	chr4:44206780-44207110	chr4	41790494	2416286	chr14:54594583-54594928	chr14	54063568	531015	chr4:72772514-72772859	chr4	72206834	565680	chr4:53240955-53241294	chr4	53854749	613455
chr8:20417390-20417490	ENSG00000061337	20161474	255916	chr15:57727479-57727578	chr16	-	-	chr25:36517684-36517784	chr25	36804789	287005	chr2:49625573-49625673	chr2	49368485	257088	chr8:68232319-68232419	chr8	67867782	364537
chr16:73439353-73439435	ENSG00000140836	73093597	345756	chr19:51601750-51601839	chr19	53739472	2137633	chr5:78991528-78991610	chr5	78610027	381501	chr3:20701531-20701613	chr3	21001311	299698	chr18:37937770-37937852	chr18	38186022	248170
chr18:52907013-52907286	ENSG00000166510	52626739	280274	chr18:64681612-64681885	chr18	67564699	2882814	chr1:20405352-20405624	chr1	20641290	235666	chr8:72909873-72910145	chr8	72654605	255268	chr24:55068805-55069077	chr24	54786447	282358
chr7:115064291-115065002	ENSG00000135272	114562209	502082	chr4:44070367-44071076	chr4	41790494	2279873	chr14:54505597-54506309	chr14	54063568	442029	chr4:72667416-72668123	chr4	72206834	460582	chr4:53333352-53334062	chr4	53854749	520687
chr9:106525913-106526020	ENSG00000136824	106856541	330521	chr5:69943778-69943888	chr5	73151949	3208061	chr11:59830464-59830571	chr11	60091674	261103	chr25:9759897-9760004	chr25	10059214	299210	chr8:95001765-95001872	chr8	95362953	361081
chr8:20753153-20753260	ENSG00000061337	20161474	591679	chr15:57270638-57270745	chr16	-	-	chr25:36217697-36217806	chr25	36804789	586983	chr2:49955974-49956083	chr2	49368485	587489	chr8:68635966-68636075	chr8	67867782	768184
chr4:189208376-189208715	ENSG00000184108	189060573	147803	chr6:5838196-5838532	chr16	-	-	chr16:42839175-42839513	chr16	42960485	120972	chr27:22477169-22477510	chr27	22592038	114528	chr27:16836976-16837315	chr27	16733420	103556
chr5:36482719-36482787	ENSG00000079215	36606457	123670	chr2:77374009-77374077	chr2	79422703	2048626	chr4:72114763-72114831	chr4	72014342	100421	chr21:28833528-28833596	chr21	28729408	104120	chr20:37816204-37816281	chr20	37680291	135913
chr6:135046174-135046258	ENSG00000118514	135271260	225002	chr1:26127050-26127134	chr1	18065413	8061637	chr1:27541574-27541656	chr1	27694895	153239	chr10:80573448-80573531	chr10	80753675	180144	chr9:73797517-73797601	chr9	74002359	204758
chr9:7332140-7332416	ENSG00000178445	6645650	686490	chr5:95397589-95397865	chr1	-	-	chr11:28222029-28222304	chr11	27584474	637555	chr23:28409511-28409785	chr23	27814482	595029	chr8:37802844-37803114	chr8	38468512	665398
chr17:54832258-54832382	ENSG00000153933	54911460	79078	chr10:76494234-76494361	chr10	73703726	2790508	chr9:31601446-31601572	chr9	31667102	65530	chr11:31190147-31190274	chr11	31253735	63461	chr19:7784408-7784535	chr19	7875200	90665
chr18:53913157-53913307	ENSG00000091157	54318574	405267	chr18:63760774-63760922	chr18	58326472	5434302	chr1:19504965-19505116	chr1	19157893	347072	chr8:73781314-73781465	chr8	74126513	345048	chr24:56084442-56084593	chr24	56467339	382746
chr7:114977906-114978379	ENSG00000135272	114562209	415697	chr4:43977475-43977926	chr4	41790494	2186981	chr14:54434149-54434621	chr14	54063568	370581	chr4:72599068-72599540	chr4	72206834	392234	chr4:53411120-53411591	chr4	53854749	443158
chr8:20324959-20325138	ENSG00000061337	20161474	163485	chr15:57811148-57811325	chr16	-	-	chr25:36601384-36601563	chr25	36804789	203226	chr2:49545479-49545656	chr2	49368485	176994	chr8:68130120-68130299	chr8	67867782	262338
chr8:20658296-20658423	ENSG00000061337	20161474	496822	chr15:57381089-57381222	chr16	-	-	chr25:36306889-36307014	chr25	36804789	497775	chr2:49860661-49860788	chr2	49368485	492176	chr8:68521974-68522100	chr8	67867782	654192
chr7:157598103-157598154	ENSG00000105993	157128075	470028	chr6:153855086-153855136	chr4	-	-	chr16:20087693-20087744	chr16	19806346	281347	chr4:107998769-107998819	chr4	107640852	357917	chr4:119706938-119706989	chr4	119431677	275261
chr2:220790870-220791024	ENSG00000124006	220436581	354289	chr9:89308803-89308957	chr9	82469082	6839721	chr37:26372327-26372481	chr37	26079752	292575	chr6:9350043-9350197	chr6	9063215	286828	chr2:108563447-108563600	chr2	108226115	337332
chr17:60148191-60148290	ENSG00000108510	60142643	5548	chr10:76418738-76418842	chr10	73685854	2732884	chr9:34634834-34634933	chr9	34641617	6684	chr11:34115855-34115954	chr11	34122135	6181	chr19:11282617-11282717	chr19	11288867	6150
chr9:13860163-13860291	ENSG00000147862	14398982	538691	chr3:50096329-50096456	chr5	-	-	chr11:34358236-34358364	chr11	34674076	315712	chr23:34051424-34051551	chr23	34332092	280541	chr8:30431495-30431624	chr8	30010800	420695
chr11:79495049-79495257	ENSG00000149256	79151992	343057	chr1:159712622-159712826	chr1	167398961	7686135	chr21:19177776-19177982	chr21	19502511	324529	chr7:64892636-64892843	chr7	65193196	300353	chr29:16266370-16266577	chr29	16642421	375844
chr9:104708668-104708751	ENSG00000198785	104500862	207806	chr5:71867078-71867159	chr5	69564696	2302382	chr11:58624954-58625037	chr11	58422278	202676	chr25:8242140-8242223	chr25	8054706	187434	chr8:93433236-93433594	chr8	93146121	287115
chr6:39485457-39485515	ENSG00000095981	39290744	194713	chr9:12087155-12087212	chr15	-	-	chr12:8411556-8411614	chr12	8232029	179527	chr20:39026111-39026169	chr20	38853900	172211	chr23:13368212-13368269	chr23	13181359	186853
chr6:104869519-104869967	ENSG00000085382	105307794	437827	chr19:61995013-61995463	chr20	-	-	chr12:61935445-61935895	chr12	62329980	394085	chr10:54879327-54879778	chr10	55242806	363028	chr9:46198006-46198468	chr9	45744424	453582
chr13:76750219-76750271	ENSG00000136153	76194570	555649	chr15:90231298-90231352	chr15	87900117	2331181	chr22:29908662-29908714	chr22	29519369	389293	chr17:49168207-49168259	chr17	48815013	353194	chr12:51530995-51531047	chr12	51141637	389358
chr3:89973077-89973300	ENSG00000044524	89156674	816403	chr13:1605922-1606146	chr11	-	-	chr33:1404114-1404337	chr33	785725	618389	chr26:937418-937641	chr26	1656872	719231	chr1:37509610-37509833	chr1	36715182	794428
chr9:27386548-27386666	ENSG00000120160	27297137	89411	chr5:55058126-55058243	chr5	117826975	62768732	chr11:45513900-45514016	chr11	45431232	82668	chr23:45137796-45137914	chr23	45064606	73190	chr8:16893226-16893342	chr8	16979547	86205
chr7:157710215-157710459	ENSG00000105993	157128075	582140	chr6:153788713-153788960	chr4	-	-	chr16:20162118-20162362	chr16	19806346	355772	chr4:108098442-108098687	chr4	107640852	457590	chr4:119771125-119771367	chr4	119431677	339448
chr11:79696167-79696527	ENSG00000149256	79151992	544175	chr1:159521047-159521399	chr1	167398961	7877562	chr21:18995531-18995888	chr21	19502511	506623	chr7:64716038-64716395	chr7	65193196	476801	chr29:16038634-16038988	chr29	16642421	603433
chr5:117678721-117678785	ENSG00000169570	118324240	645455	chr18:42819508-42819572	chr14	-	-	chr11:7866367-7866431	chr11	8346507	480076	chr14:54613972-54614036	chr14	54153274	460698	chr7:36746450-36746514	chr7	36230534	515916
chr11:79527096-79527292	ENSG00000149256	79151992	375104	chr1:159672777-159672973	chr1	167398961	7725988	chr21:19153251-19153447	chr21	19502511	349064	chr7:64867609-64867804	chr7	65193196	325392	chr29:16231482-16231679	chr29	16642421	410742
chr9:106362150-106362333	ENSG00000136824	106856541	494208	chr5:70140699-70140874	chr5	73151949	3011075	chr11:59678989-59679170	chr11	60091674	412504	chr25:9611453-9611632	chr25	10059214	447582	chr8:94788833-94789016	chr8	95362953	573937
chr9:7375121-7375365	ENSG00000178445	6645650	729471	chr5:95538273-95538517	chr1	-	-	chr11:28260010-28260258	chr11	27584474	675536	chr23:28447186-28447433	chr23	27814482	632704	chr8:37744981-37745226	chr8	38468512	723286
chr3:90016535-90016793	ENSG00000044524	89156674	859861	chr13:1579439-1579698	chr11	-	-	chr33:1428114-1428374	chr33	785725	642389	chr26:914934-915191	chr26	1656872	741681	chr1:37547798-37548059	chr1	36715182	832616
chr8:132046149-132046201	ENSG00000153317	131455906	590243	chr7:105533078-105533128	chr7	91990638	13542440	chr13:27930755-27930806	chr13	27430768	499987	chr9:72096027-72096078	chr9	71598463	497564	chr14:10828885-10828936	chr14	11327900	498964
chr2:67869028-67869083	ENSG00000143971	67624451	244577	chr14:99648647-99648702	chr14	102047669	2398967	chr10:66832979-66833033	chr10	66631403	201576	chr15:34464116-34464169	chr15	34678370	214201	chr11:66060674-66060728	chr11	65813352	247322
chr3:62479857-62479913	ENSG00000153266	62359999	119858	chr15:19641301-19641357	chr15	16854938	2786363	chr20:28584279-28584335	chr20	28704683	120348	chr16:26577107-26577163	chr16	26692919	115756	chr22:38946286-38946342	chr22	39068358	122016
chr3:90107421-90107757	ENSG00000044524	89156674	950747	chr13:1472042-1472377	chr11	-	-	chr33:1493463-1493798	chr33	785725	707738	chr26:836389-836721	chr26	1656872	820151	chr1:37640736-37641070	chr1	36715182	925554
chr16:51123204-51123400	ENSG00000103449	51185278	61878	chr19:30046082-30046277	chr19	34379537	4333260	chr2:64302559-64302756	chr2	64245467	57092	chr3:3932541-3932738	chr3	3978895	46157	chr18:19593555-19593752	chr18	19653740	59988
chr5:117856622-117856693	ENSG00000169570	118324240	467547	chr18:43029030-43029098	chr14	-	-	chr11:8011136-8011207	chr11	8346507	335300	chr14:54475989-54476060	chr14	54153274	322715	chr7:36573092-36573163	chr7	36230534	342558
chr6:14311186-14311346	ENSG00000112149	14117872	193314	chr17:22812054-22812214	chr17	26364943	3552729	chr35:13661273-13661433	chr35	13489273	172000	chr20:13786881-13787041	chr20	13617586	169295	chr23:42183921-42184081	chr23	42354680	170599
chr2:119843880-119844267	ENSG00000144119	119916465	72198	chr16:84495265-84495669	chr13	-	-	chr19:30930055-30930442	chr19	30862601	67454	chr18:12020504-12020891	chr18	11951832	68672	chr2:71208951-71209337	chr2	71285350	76013
chr5:117379481-117379669	ENSG00000169570	118324240	944571	chr18:43354262-43354453	chr14	-	-	chr11:7608780-7608970	chr11	8346507	737537	chr14:54846035-54846224	chr14	54153274	692761	chr7:37036824-37037013	chr7	36230534	806290
chr12:67381877-67381945	ENSG00000155974	67197966	183911	chr7:62453086-62453155	chr7	64890312	2437157	chr10:9376255-9376322	chr10	9063901	312354	chr6:82345029-82345096	chr6	82051586	293443	chr5:47029865-47029932	chr5	47393104	363172
chr5:51688177-51688264	ENSG00000213949	52083730	395466	chr2:66203521-66203608	chr2	71763917	5560309	chr4:62782402-62782489	chr4	62455624	326778	chr21:19456028-19456115	chr21	19153982	302046	chr20:26689279-26689366	chr20	26293313	395966
chr5:98801681-98801856	ENSG00000153922	98262240	539441	chr9:101525617-101525790	chr1	-	-	chr3:10811312-10811487	chr3	11288970	477483	chr14:70018584-70018758	chr14	70498333	479575	chr7:101218568-101218742	chr7	100565742	652826
chr18:25178746-25178963	ENSG00000154080	24765281	413465	chr18:10088639-10088857	chr18	7070090	3018549	chr7:61240048-61240266	chr7	61571732	331466	chr8:49008858-49009075	chr8	48604187	404671	chr24:29613909-29614126	chr24	30037088	422962
chr13:76773143-76773200	ENSG00000136153	76194570	578573	chr15:90216757-90216815	chr15	87900117	2316640	chr22:29920876-29920932	chr22	29519369	401507	chr17:49184144-49184200	chr17	48815013	369131	chr12:51553892-51553950	chr12	51141637	412255
chr5:51794143-51794309	ENSG00000213949	52083730	289421	chr2:66106955-66107129	chr2	71763917	5656788	chr4:62686859-62687031	chr4	62455624	231235	chr21:19367586-19367758	chr21	19153982	213604	chr20:26559429-26559601	chr20	26293313	266116
chr3:110435385-110435737	ENSG00000177707	110788918	353181	chr11:59941327-59941686	chr11	62144557	2202871	chr33:15597907-15598259	chr33	15871172	272913	chr19:46638272-46638628	chr19	46336940	301332	chr1:55977385-55977742	chr1	56308185	330443
chr18:52832718-52832826	ENSG00000166510	52626739	205979	chr18:64744108-64744217	chr18	67564699	2820482	chr1:20459327-20459435	chr1	20641290	181855	chr8:72850664-72850772	chr8	72654605	196059	chr24:55003000-55003108	chr24	54786447	216553
chr15:68779810-68779879	ENSG00000137809	68724501	55309	chr8:71103638-71103706	chr8	67299007	3804631	chr30:32485320-32485386	chr30	32405661	79659	chr1:124400446-124400512	chr1	124447421	46909	chr10:15295926-15295999	chr10	15236778	59148
chr9:22819624-22819786	ENSG00000176399	22446840	372784	chr5:114325049-114325208	chr5	112243551	2081498	chr11:41840799-41840961	chr11	41566167	274632	chr23:41607287-41607448	chr23	41325540	281747	chr8:21407252-21407406	chr8	21768203	360797
chr3:62465513-62466070	ENSG00000153266	62359999	105514	chr15:19654202-19654781	chr15	16854938	2799264	chr20:28596701-28597261	chr20	28704683	107422	chr16:26589964-26590528	chr16	26692919	102391	chr22:38958477-38959033	chr22	39068358	109325
chr7:112919160-112919220	ENSG00000164604	112727833	191327	chr4:40056238-40056298	chr4	43719803	3663505	chr14:52749910-52749968	chr14	52573892	176018	chr4:70922115-70922175	chr4	70763801	158314	chr4:55476148-55476208	chr4	55640695	164487
chr12:33118169-33118382	ENSG00000057294	33049774	68395	chr7:130270875-130271096	chr11	-	-	chr27:15978774-15978992	chr27	16023168	44176	chr6:56842505-56842719	chr6	56782169	60336	chr5:77288887-77289100	chr5	77370738	81638
chr16:13826539-13826642	ENSG00000175595	14014014	187372	chr3:98701304-98701406	chr10	-	-	chr6:29418210-29418315	chr6	29226896	191314	chr13:31210178-31210281	chr13	31024646	185532	chr25:12629082-12629187	chr25	12923472	294285
chr7:42793057-42793296	ENSG00000136197	42951904	158608	chr17:53549659-53549896	chr17	50782041	2767618	chr18:7320058-7320296	chr18	7233303	86755	chr4:13840640-13840870	chr4	13919887	79017	chr4:78918843-78919077	chr4	78839309	79534
chr10:87167064-87167123	ENSG00000199104	88024545	857422	chr16:12755998-12756058	chr16	9574932	3181066	chr4:33365766-33365826	chr4	34073429	707603	chr1:84842499-84842559	chr1	84117509	724990	chr28:40532793-40532853	chr28	41329149	796296
chr18:53974165-53974263	ENSG00000091157	54318574	344311	chr18:63703470-63703568	chr18	58326472	5376998	chr1:19444257-19444355	chr1	19157893	286364	chr8:73844470-73844568	chr8	74126513	281945	chr24:56156934-56157032	chr24	56467339	310307
chr12:99545623-99545796	ENSG00000180219	100041531	495735	chr7:31362595-31362760	chr13	-	-	chr15:38497213-38497388	chr15	38890120	392732	chr28:23514177-23514352	chr28	23899793	385441	chr5:63655704-63655879	chr5	64094901	439022
chr2:220691864-220692067	ENSG00000124006	220436581	255283	chr9:89189816-89190019	chr9	82469082	6720734	chr37:26287561-26287764	chr37	26079752	207809	chr6:9265552-9265752	chr6	9063215	202337	chr2:108460178-108460382	chr2	108226115	234063
chr20:16689344-16689509	ENSG00000125870	16710606	21097	chr15:13203288-13203448	chr3	-	-	chr24:6142090-6142255	chr24	6117369	24721	chr22:7880868-7881033	chr22	7860020	20848	chr13:10703912-10704077	chr13	10734367	30290
chr5:51571469-51571711	ENSG00000213949	52083730	512019	chr2:66285412-66285652	chr2	71763917	5478265	chr4:62884172-62884427	chr4	62455624	428548	chr21:19548606-19548860	chr21	19153982	394624	chr20:26800444-26800697	chr20	26293313	507131
chr13:23301030-23301092	ENSG00000102683	23755091	453999	chr15:43312041-43312102	chr15	45385876	2073774	chr25:15734167-15734228	chr25	15403190	330977	chr17:3386190-3386251	chr17	3857467	471216	chr12:35071724-35071784	chr12	34954970	116754
chr8:20628358-20628423	ENSG00000061337	20161474	466884	chr15:57417751-57417815	chr16	-	-	chr25:36342244-36342309	chr25	36804789	462480	chr2:49813302-49813366	chr2	49368485	444817	chr8:68483985-68484050	chr8	67867782	616203
chr16:16592223-16592470	ENSG00000091262	16317379	274844	chr1:193171489-193171728	chr1	103096453	90075036	chr6:27629366-27629614	chr6	27800215	170601	chr13:29468781-29469025	chr13	29615990	146965	chr25:14834708-14834953	chr25	14643302	191406
chr9:106726723-106726867	ENSG00000136824	106856541	129674	chr5:69672249-69672398	chr5	73151949	3479551	chr11:59996799-59996941	chr11	60091674	94733	chr25:9972140-9972281	chr25	10059214	86933	chr8:95251332-95251475	chr8	95362953	111478
chr2:220905679-220906186	ENSG00000124006	220436581	469098	chr9:89433575-89434079	chr9	82469082	6964493	chr37:26469669-26470196	chr37	26079752	389917	chr6:9453505-9454010	chr6	9063215	390290	chr2:108687503-108688008	chr2	108226115	461388
chr18:52974176-52974250	ENSG00000166510	52626739	347437	chr18:64617765-64617836	chr18	67564699	2946863	chr1:20338073-20338147	chr1	20641290	303143	chr8:72974899-72974972	chr8	72654605	320294	chr24:55146370-55146443	chr24	54786447	359923
chr2:220903944-220904050	ENSG00000124006	220436581	467363	chr9:89431608-89431717	chr9	82469082	6962526	chr37:26467887-26467999	chr37	26079752	388135	chr6:9451767-9451879	chr6	9063215	388552	chr2:108684239-108684351	chr2	108226115	458124
chr14:58596695-58596876	ENSG00000131966	58666798	69922	chr15:30593117-30593304	chr6	-	-	chr8:33518444-33518629	chr8	33575408	56779	chr24:5869848-5870031	chr24	5933373	63342	chr10:70701375-70701558	chr10	70761696	60138
chr2:127034531-127034766	ENSG00000136732	127413509	378743	chr13:28395468-28395702	chr18	-	-	chr19:24370584-24370818	chr19	23988748	381836	chr18:4603950-4604183	chr18	4245068	358882	chr2:78856116-78856349	chr2	79255684	399335
chr1:81702928-81703150	ENSG00000117114	81771845	68695	chr2:273288395-273288618	chr2	277602151	4313533	chr6:66277547-66277770	chr6	66216074	61473	chr5:82146260-82146482	chr5	81707657	438603	chr3:63441512-63441733	chr3	63355165	86347
chr2:221356341-221356403	ENSG00000124006	220436581	919760	chr9:89858659-89858722	chr9	82469082	7389577	chr37:26848085-26848147	chr37	26079752	768333	chr6:9849614-9849676	chr6	9063215	786399	chr2:109186843-109186904	chr2	108226115	960728
chr7:36568973-36569097	ENSG00000164542	36429734	139239	chr17:57587973-57588098	chr8	-	-	chr14:47908856-47908980	chr14	47805350	103506	chr4:65996890-65997013	chr4	65866264	130626	chr4:61103583-61103707	chr4	61258800	155093
chr3:110370712-110371046	ENSG00000177707	110788918	417872	chr11:59878195-59878531	chr11	62144557	2266026	chr33:15551708-15552064	chr33	15871172	319108	chr19:46693783-46694118	chr19	46336940	356843	chr1:55918194-55918528	chr1	56308185	389657
chr2:138238110-138238327	ENSG00000150540	138721590	483263	chr13:51799839-51800055	chr3	-	-	chr19:40154503-40154719	chr19	40656232	501513	chr18:21102808-21103021	chr18	21516160	413139	chr2:59984916-59985133	chr2	59417441	567475
chr4:141156546-141156647	ENSG00000153130	141178440	21793	chr2:161039784-161039885	chr19	-	-	chr19:2586183-2586284	chr19	2566489	19694	chr2:91215125-91215223	chr2	91194812	20313	chr17:17781293-17781395	chr17	17757670	23623
chr2:59816576-59817114	ENSG00000119866	60780702	963588	chr14:105355421-105355966	chr14	108548256	3192290	chr10:59816430-59816972	chr10	60689285	872313	chr15:41386387-41386922	chr15	40536640	849747	chr11:42194251-42194780	chr11	43174031	979251
chr7:19764555-19764691	ENSG00000105849	19748710	15845	chr6:156842983-156843120	chr6	62372117	94470866	chr14:33884866-33885002	chr14	33865639	19227	chr4:51724128-51724266	chr4	51706598	17530	chr4:28475536-28475697	chr4	28456952	18584
chr1:81732974-81733198	ENSG00000117114	81771845	38647	chr2:273263279-273263512	chr2	277602151	4338639	chr6:66257766-66257990	chr6	66216074	41692	chr5:82123620-82123842	chr5	81707657	415963	chr3:63412896-63413119	chr3	63355165	57731
chr6:14291306-14291582	ENSG00000112149	14117872	173434	chr17:22801381-22801658	chr17	26364943	3563285	chr35:13649560-13649836	chr35	13489273	160287	chr20:13775484-13775760	chr20	13617586	157898	chr23:42197011-42197287	chr23	42354680	157393
chr1:81488721-81488795	ENSG00000117114	81771845	283050	chr2:273530130-273530208	chr2	277602151	4071943	chr6:66460990-66461063	chr6	66216074	244916	chr5:82320992-82321067	chr5	81707657	613335	chr3:63653853-63653926	chr3	63355165	298688
chr7:115114617-115114882	ENSG00000135272	114562209	552408	chr4:44136832-44137103	chr4	41790494	2346338	chr14:54556243-54556510	chr14	54063568	492675	chr4:72733218-72733484	chr4	72206834	526384	chr4:53277855-53278121	chr4	53854749	576628
chr3:184371138-184371275	ENSG00000177383	184429836	58561	chr11:86535917-86536052	chr1	-	-	chr34:17500955-17501092	chr34	17544950	43858	chr19:22987685-22987822	chr19	23030761	42939	chr1:83136516-83136652	chr1	83090425	46091
chr14:54649493-54649616	ENSG00000100526	54863567	213951	chr15:24929190-24929313	chr15	27496685	2567372	chr8:30176806-30176927	chr8	30344957	168030	chr24:2565851-2565972	chr24	2726900	160928	chr10:66969605-66969726	chr10	67155090	185364
chr4:150225331-150225469	ENSG00000170390	150999426	773957	chr19:46528401-46528539	chr2	-	-	chr15:47453244-47453381	chr15	48119273	665892	chr2:83920145-83920282	chr2	83278289	641856	chr17:8548034-8548169	chr17	7742116	805918
chr4:189230085-189230333	ENSG00000184108	189060573	169512	chr6:5854288-5854536	chr16	-	-	chr16:42818150-42818399	chr16	42960485	142086	chr27:22452410-22452657	chr27	22592038	139381	chr27:16862194-16862443	chr27	16733420	128774
chr18:30121903-30122003	ENSG00000141441	30050447	71456	chr18:12180542-12180641	chr18	14769099	2588458	chr7:57167354-57167454	chr7	57295067	127613	chr8:53312209-53312309	chr8	53246251	65958	chr24:24922537-24922637	chr24	25005192	82555
chr8:20726490-20726777	ENSG00000061337	20161474	565016	chr15:57308612-57308899	chr16	-	-	chr25:36243621-36243908	chr25	36804789	560881	chr2:49931728-49932014	chr2	49368485	563243	chr8:68593814-68611048	chr8	67867782	726032
chr8:36546981-36547094	ENSG00000215262	36641842	94748	chr16:68103494-68103610	chr16	70663273	2559663	chr16:28550489-28550602	chr16	28478384	72105	chr27:8777036-8777149	chr27	8699565	77471	chr27:31786237-31786350	chr27	31849126	62776
chr2:59281394-59281577	ENSG00000115392	58468507	812887	chr14:105854299-105854482	chr14	110369224	4514742	chr10:59353052-59353236	chr10	58632368	720684	chr15:41838924-41839108	chr15	42591277	752169	chr11:41648164-41648348	chr11	40744419	903745
chr9:103411785-103411865	ENSG00000170681	103340361	71424	chr5:72965055-72965135	chr5	68926894	4038161	chr11:57504505-57504585	chr11	57453536	50969	chr25:7117059-7117138	chr25	7054711	62348	chr8:92000322-92000403	chr8	91916199	84123
chr5:51642520-51642842	ENSG00000213949	52083730	440888	chr2:66246576-66246891	chr2	71763917	5517026	chr4:62833957-62834279	chr4	62455624	378333	chr21:19505305-19505624	chr21	19153982	351323	chr20:26755826-26756172	chr20	26293313	462513
chr3:147940690-147940803	ENSG00000144891	148415571	474768	chr8:97386365-97386483	chr2	-	-	chr23:43200008-43200122	chr23	43613937	413815	chr16:81174242-81174355	chr16	81548815	374460	chr1:120953908-120954022	chr1	120445395	508513
chr1:81769442-81769722	ENSG00000117114	81771845	2123	chr2:273223030-273223314	chr2	277602151	4378837	chr6:66218521-66218803	chr6	66216074	2447	chr5:82087077-82087357	chr5	81707657	379420	chr3:63357279-63357559	chr3	63355165	2114
chr2:221630856-221631066	ENSG00000116106	222438922	807856	chr9:90129657-90129869	chr9	83022498	7107159	chr37:27076031-27076238	chr37	27805314	729076	chr6:10068747-10068957	chr6	10795190	726233	chr2:109494320-109494530	chr2	110405363	910833
chr5:109722233-109722288	ENSG00000164209	110073837	351549	chr9:112490080-112490135	chr18	-	-	chr3:1988019-1988074	chr3	1719781	268238	chr14:61120595-61120650	chr14	60895084	225511	chr7:112001307-112001362	chr7	112332867	331505
chr1:81604935-81605143	ENSG00000117114	81771845	166702	chr2:273368241-273368444	chr2	277602151	4233707	chr6:66355832-66356039	chr6	66216074	139758	chr5:82220904-82221110	chr5	81707657	513247	chr3:63525018-63525227	chr3	63355165	169853
chr9:104968133-104968268	ENSG00000198785	104500862	467271	chr5:71569577-71569711	chr5	69564696	2004881	chr11:58774217-58774352	chr11	58422278	351939	chr25:8405671-8405805	chr25	8054706	350965	chr8:93636059-93636194	chr8	93146121	489938
chr5:51735562-51735694	ENSG00000213949	52083730	348036	chr2:66163178-66163310	chr2	71763917	5600607	chr4:62738903-62739285	chr4	62455624	283279	chr21:19418487-19418619	chr21	19153982	264505	chr20:26631483-26631614	chr20	26293313	338170
chr3:153603308-153603384	ENSG00000114790	153838792	235408	chr2:171943053-171943128	chr2	46226740	125716313	chr23:48095503-48095579	chr23	48290113	194534	chr16:85802057-85802133	chr16	85972751	170618	chr1:114676281-114676358	chr1	114432073	244208
chr16:73770330-73770421	ENSG00000140836	73093597	676733	chr19:51023407-51023521	chr19	53739472	2715951	chr5:79285125-79285216	chr5	78610027	675098	chr3:20414511-20414602	chr3	21001311	586709	chr18:37638257-37638344	chr18	38186022	547678
chr2:78604845-78605152	ENSG00000143954	79252812	647660	chr4:179070597-179070900	chr4	174233865	4836732	chr17:45370620-45370926	chr17	44861538	509082	chr15:25235527-25235833	chr15	24616180	619347	chr11:57555120-57555427	chr11	56642401	912719
chr2:15998637-15998864	ENSG00000134323	16080686	81822	chr6:46981246-46981473	chr6	51353994	4372521	chr17:11664850-11665077	chr17	11718464	53387	chr15:78645009-78645236	chr15	78588928	56081	chr11:82586136-82586363	chr11	82695073	108710
chr3:110648463-110648704	ENSG00000177707	110788918	140214	chr11:60136593-60136837	chr11	62144557	2007720	chr33:15770929-15771173	chr33	15871172	99999	chr19:46463538-46463779	chr19	46336940	126598	chr1:56201299-56201544	chr1	56308185	106641
chr2:221368250-221368367	ENSG00000124006	220436581	931669	chr9:89870831-89870946	chr9	82469082	7401749	chr37:26862115-26862229	chr37	26079752	782363	chr6:9861710-9861827	chr6	9063215	798495	chr2:109200503-109200620	chr2	108226115	974388
chr16:73433407-73433592	ENSG00000140836	73093597	339810	chr19:51594021-51594219	chr19	53739472	2145253	chr5:78985234-78985420	chr5	78610027	375207	chr3:20707697-20707882	chr3	21001311	293429	chr18:37943013-37943439	chr18	38186022	242583
chr11:85658689-85658816	ENSG00000150676	85566144	92545	chr1:160773126-160773251	chr4	-	-	chr21:13549472-13549600	chr21	13597586	47986	chr7:59738437-59738565	chr7	59794054	55489	chr29:9697800-9697928	chr29	9758385	60457
chr3:157689681-157689907	ENSG00000174891	157823644	133737	chr2:178044119-178044349	chr2	183478535	5434186	chr23:51381907-51382138	chr23	51496372	114234	chr19:1659690-1659916	chr19	1790934	131018	chr1:110411798-110412023	chr1	110273770	138028
chr9:106406092-106406184	ENSG00000136824	106856541	450357	chr5:70102647-70102740	chr5	73151949	3049209	chr11:59713553-59713646	chr11	60091674	378028	chr25:9647976-9648068	chr25	10059214	411146	chr8:94837533-94837625	chr8	95362953	525328
chr3:177963081-177963258	ENSG00000197584	177990720	27462	chr2:125841322-125841495	chr2	137954821	12113326	chr34:41540800-41540976	chr34	41963562	422586	chr19:17600456-17600633	chr19	17863925	263292	chr1:89369074-89369251	chr1	89080346	288728
chr3:62448597-62448703	ENSG00000153266	62359999	88598	chr15:19671340-19671446	chr15	16854938	2816402	chr20:28614363-28614471	chr20	28704683	90212	chr16:26608110-26608218	chr16	26692919	84701	chr22:38978034-38978141	chr22	39068358	90217
chr6:14468305-14468371	ENSG00000112149	14117872	350433	chr17:22941508-22941573	chr17	26364943	3423370	chr35:13803653-13803718	chr35	13489273	314380	chr20:13936724-13936789	chr20	13617586	319138	chr23:42055928-42055993	chr23	42354680	298687
chr9:109201239-109201292	ENSG00000148143	109625378	424086	chr5:77936044-77936097	chr5	75809671	2126373	chr11:62068242-62068295	chr11	62401696	333401	chr25:12324032-12324085	chr25	12656077	331992	chr8:97852719-97852772	chr8	98274178	421406
chr5:103788912-103789288	ENSG00000112874	102898494	890418	chr9:108831600-108831976	chr9	105294901	3536699	chr3:6940579-6940955	chr3	7697470	756515	chr14:66036285-66036661	chr14	66749358	712697	chr7:106021626-106021996	chr7	105045004	976622
chr2:222513616-222513799	ENSG00000116106	222438922	74694	chr2:183400316-183400499	chr9	-	-	chr37:27883836-27884018	chr37	27809644	74192	chr6:10856274-10856457	chr6	10797060	59214	chr2:110491165-110491344	chr2	110407327	83838
chr2:15159139-15159305	ENSG00000162981	14772810	386329	chrX:51178990-51179158	chr6	-	-	chr17:10962769-10962933	chr17	10658501	304268	chr15:79369197-79369365	chr15	79674201	304836	chr11:83316310-83316479	chr11	83658987	342508
chr4:134393446-134393830	ENSG00000138650	134070470	322976	chr2:150849171-150849576	chr2	156481915	5632339	chr19:8447705-8448090	chr19	8732650	284560	chr2:96808814-96809197	chr2	97081807	272610	chr17:25184992-25185373	chr17	25495147	309774
chr3:177612632-177612715	ENSG00000197584	177990720	378005	chr2:126329903-126329990	chr2	137954821	11624831	chr34:41245119-41245202	chr34	41963562	718360	chr19:17288137-17288220	chr19	17863925	575705	chr1:89754105-89754188	chr1	89080346	673759
chr2:222522611-222522919	ENSG00000116106	222438922	83689	chr2:183406344-183406642	chr9	-	-	chr37:27894476-27894780	chr37	27809644	84832	chr6:10866504-10866817	chr6	10797060	69444	chr2:110502898-110503204	chr2	110407327	95571
chr5:157980279-157980494	ENSG00000164330	158526769	546275	chr10:30128968-30129182	chr10	23523689	6605279	chr4:51887540-51887755	chr4	51378963	508577	chr14:20899385-20899600	chr14	20400279	499106	chr7:72250269-72250484	chr7	72804182	553698
chr16:13739652-13739951	ENSG00000175595	14014014	274063	chr3:98788464-98788768	chr10	-	-	chr6:29488574-29488874	chr6	29226896	261678	chr13:31278907-31279207	chr13	31024646	254261	chr25:12564815-12565119	chr25	12923472	358353
chrX:23152389-23152650	ENSG00000184735	23018087	134302	chrX:42512911-42513169	chr8	-	-	chrX:18909070-18909331	chrX	18776371	132699	chrX:17520412-17520696	chrX	17468947	51465	chrX:127122112-127122373	chrX	127364927	242554
chr3:62483379-62483471	ENSG00000153266	62359999	123380	chr15:19638140-19638232	chr15	16854938	2783202	chr20:28580987-28581079	chr20	28704683	123604	chr16:26573871-26573963	chr16	26692919	118956	chr22:38943577-38943669	chr22	39068358	124689
chr2:221676551-221676737	ENSG00000116106	222438922	762185	chr9:90173924-90174110	chr9	83022498	7151426	chr37:27121938-27122125	chr37	27805314	683189	chr6:10119680-10119867	chr6	10795190	675323	chr2:109541646-109541833	chr2	110405363	863530
chr2:221961787-221962093	ENSG00000116106	222438922	476829	chr9:90444388-90444698	chr9	83022498	7421890	chr37:27370433-27370741	chr37	27805314	434573	chr6:10365218-10365524	chr6	10795190	429666	chr2:109880242-109880547	chr2	110405363	524816
chr2:67853195-67853557	ENSG00000143971	67624451	228744	chr14:99627423-99627784	chr14	102047669	2419885	chr10:66819627-66819985	chr10	66631403	188224	chr15:34478873-34479231	chr15	34678370	199139	chr11:66044752-66045110	chr11	65813352	231400
chr11:79596836-79596896	ENSG00000149256	79151992	444844	chr1:159617918-159617978	chr1	167398961	7780983	chr21:19096798-19096858	chr21	19502511	405653	chr7:64813754-64813814	chr7	65193196	379382	chr29:16164622-16164682	chr29	16642421	477739
chr2:46307016-46307402	ENSG00000116016	46520806	213404	chr6:9784604-9784985	chr6	20299176	10514191	chr10:48372408-48372796	chr10	48550882	178086	chr15:52798111-52798498	chr15	52622187	175924	chr11:28376959-28377340	chr11	28575995	198655
chr5:117509726-117510006	ENSG00000169570	118324240	814234	chr18:43489772-43490054	chr14	-	-	chr11:7733567-7733848	chr11	8346507	612659	chr14:54735747-54736028	chr14	54153274	582473	chr7:36898095-36898376	chr7	36230534	667561
chr4:149464208-149464321	ENSG00000151623	149365850	98358	chr8:50065386-50065500	chr19	-	-	chr15:46788773-46788882	chr15	46715850	72923	chr2:84581461-84581574	chr2	84650362	68788	chr17:9639432-9639545	chr17	9736345	96800
chr9:103998105-103998256	ENSG00000136881	104145801	147545	chr5:72386504-72386657	chr5	69268710	3117794	chr11:58002498-58002653	chr11	58109368	106715	chr25:7590112-7590267	chr25	7704932	114665	chr8:92587817-92587974	chr8	92724710	136736
chr8:125874550-125874626	ENSG00000180938	125985540	110914	chr7:99690071-99690147	chr1	-	-	chr13:22902049-22902125	chr13	22979979	77854	chr9:66999609-66999685	chr9	67117890	118205	chr14:16841975-16842051	chr14	16783575	58400
chr2:78613217-78613461	ENSG00000143954	79252812	639351	chr4:179088435-179088679	chr4	174233865	4854570	chr17:45376561-45376806	chr17	44861538	515023	chr15:25227971-25228217	chr15	24616180	611791	chr11:57547502-57547745	chr11	56642401	905101
chr15:60126576-60126718	ENSG00000140299	59981733	144843	chr8:80444549-80444691	chr8	76675968	3768581	chr30:24665701-24665843	chr30	24546564	119137	chr1:131921629-131921772	chr1	132022504	100732	chr10:50480750-50480892	chr10	50628360	147468
chr9:83122633-83123236	ENSG00000106829	82186688	935945	chr5:91092239-91092833	chr1	-	-	chr1:78568997-78569596	chr1	79269883	700287	chr23:11516823-11517410	chr23	12316041	798631	chr8:56709082-56709681	chr8	55837380	871702
chr2:221932238-221932563	ENSG00000116106	222438922	506359	chr9:90423574-90423902	chr9	83022498	7401076	chr37:27349768-27350096	chr37	27805314	455218	chr6:10344507-10344834	chr6	10795190	450356	chr2:109846490-109846820	chr2	110405363	558543
chr16:73349638-73349802	ENSG00000140836	73093597	256041	chr19:51516957-51517120	chr19	53739472	2222352	chr5:78907198-78907362	chr5	78610027	297171	chr3:20785380-20785544	chr3	21001311	215767	chr18:38020749-38020913	chr18	38186022	165109
chr7:42689657-42690030	ENSG00000136197	42951904	261874	chr17:53718495-53718858	chr17	50782041	2936454	chr18:7425900-7426273	chr18	7233303	192597	chr4:13736116-13736489	chr4	13919887	183398	chr4:79034524-79034896	chr4	78839309	195215
chr8:20525647-20525870	ENSG00000061337	20161474	364173	chr15:57622842-57623063	chr16	-	-	chr25:36435120-36435343	chr25	36804789	369446	chr2:49721302-49721522	chr2	49368485	352817	chr8:68344813-68345036	chr8	67867782	477031
chr4:143077477-143077627	ENSG00000164136	142557752	519725	chr19:40609828-40609975	chr19	34544021	6065807	chr19:1082729-1082879	chr19	1352457	269578	chr2:89619940-89620090	chr2	89935123	315033	chr17:15983825-15983975	chr17	16363886	379911
chr13:23168404-23168505	ENSG00000102683	23755091	586586	chr15:43163150-43163250	chr15	45385876	2222626	chr25:15854583-15854684	chr25	15403190	451393	chr17:3267056-3267157	chr17	3857467	590310	chr12:35136600-35136701	chr12	34954970	181630
chr8:20593495-20593551	ENSG00000061337	20161474	432021	chr15:57454465-57454520	chr16	-	-	chr25:36368361-36368417	chr25	36804789	436372	chr2:49778385-49778441	chr2	49368485	409900	chr8:68440978-68441034	chr8	67867782	573196
chr16:50944777-50945606	ENSG00000103449	51185278	239672	chr19:30197921-30198751	chr19	34379537	4180786	chr2:64456620-64457450	chr2	64245467	211153	chr3:3781131-3781961	chr3	3978895	196934	chr18:19415914-19416749	chr18	19653740	236991
chr5:117728389-117728468	ENSG00000169570	118324240	595772	chr18:42879056-42879139	chr14	-	-	chr11:7904993-7905072	chr11	8346507	441435	chr14:54568062-54568141	chr14	54153274	414788	chr7:36683791-36683870	chr7	36230534	453257
chr5:50879353-50879405	ENSG00000016082	50678921	200432	chr2:69745445-69745497	chr2	66884387	2861058	chr4:63459632-63459684	chr4	63648648	188964	chr21:20104783-20104835	chr21	20306385	201550	chr20:27511560-27511612	chr20	27755504	243892
chr18:52754192-52754490	ENSG00000166510	52626739	127453	chr18:64823962-64824260	chr18	67564699	2740439	chr1:20529486-20529781	chr1	20641290	111509	chr8:72778610-72778907	chr8	72654605	124005	chr24:54921054-54921351	chr24	54786447	134607
chr3:89908808-89909232	ENSG00000044524	89156674	752134	chr13:1696487-1696911	chr11	-	-	chr33:1362754-1363179	chr33	785725	577029	chr26:987522-987941	chr26	1656872	668931	chr1:37463301-37463724	chr1	36715182	748119
chr2:84187507-84187623	ENSG00000163541	84687169	499546	chr4:168864390-168864507	chr4	165937928	2926462	chr17:40750854-40750971	chr17	40393146	357708	chr15:20244216-20244333	chr15	19834367	409849	chr11:51006530-51006647	chr11	50400444	606086
chr3:147991340-147991430	ENSG00000144891	148415571	424141	chr8:97300086-97300176	chr2	-	-	chr23:43240578-43240668	chr23	43613937	373269	chr16:81223715-81223805	chr16	81548815	325010	chr1:120879291-120879381	chr1	120445395	433896
chr2:221795430-221795633	ENSG00000116106	222438922	643289	chr9:90292748-90292949	chr9	83022498	7270250	chr37:27221295-27221497	chr37	27805314	583817	chr6:10219564-10219766	chr6	10795190	575424	chr2:109673057-109673259	chr2	110405363	732104
chr4:150803277-150803641	ENSG00000170390	150999426	195785	chr19:47583929-47584291	chr2	-	-	chr15:47936194-47936560	chr15	48119273	182713	chr2:83435470-83435830	chr2	83278289	157181	chr17:7955573-7955939	chr17	7742116	213457
chr5:51786927-51787278	ENSG00000213949	52083730	296452	chr2:66112730-66113087	chr2	71763917	5650830	chr4:62695014-62695367	chr4	62455624	239390	chr21:19373193-19373541	chr21	19153982	219211	chr20:26570017-26570364	chr20	26293313	276704
chr9:104629595-104629882	ENSG00000198785	104500862	128733	chr5:71971673-71971961	chr5	69564696	2406977	chr11:58554337-58554624	chr11	58422278	132059	chr25:8170946-8171232	chr25	8054706	116240	chr8:93343019-93343305	chr8	93146121	196898
chr4:23743316-23743543	ENSG00000109606	24586173	842630	chr14:63336094-63336319	chr14	61248770	2087324	chr3:86326612-86326841	chr3	85549939	776673	chr3:100920998-100921226	chr3	100177256	743742	chr6:44786855-44787083	chr6	45683587	896504
chr2:221128642-221128716	ENSG00000124006	220436581	692061	chr9:89648191-89648289	chr9	82469082	7179109	chr37:26666194-26666268	chr37	26079752	586442	chr6:9655834-9655908	chr6	9063215	592619	chr2:108939576-108939650	chr2	108226115	713461
chr5:117568311-117568399	ENSG00000169570	118324240	755841	chr18:43562073-43562163	chr14	-	-	chr11:7788071-7788159	chr11	8346507	558348	chr14:54692162-54692251	chr14	54153274	538888	chr7:36844510-36844599	chr7	36230534	613976
chr2:146056966-146057305	ENSG00000169554	145282147	774819	chr3:39322216-39322543	chr3	35196121	4126095	chr19:47322476-47322822	chr19	46550583	771893	chr18:28182457-28182794	chr18	27461817	720640	chr2:51331820-51332160	chr2	52274862	942702
chr2:221638421-221638525	ENSG00000116106	222438922	800397	chr9:90140464-90140597	chr9	83022498	7117966	chr37:27087968-27088073	chr37	27805314	717241	chr6:10079463-10079568	chr6	10795190	715622	chr2:109502543-109502644	chr2	110405363	902719
chr2:146028052-146028367	ENSG00000169554	145282147	745905	chr3:39207647-39207962	chr3	35196121	4011526	chr19:47292570-47292888	chr19	46550583	741987	chr18:28153410-28153728	chr18	27461817	691593	chr2:51369119-51369438	chr2	52274862	905424
chr5:127207618-127207826	ENSG00000064651	127419458	211632	chr16:46270825-46271033	chr18	-	-	chr11:16936217-16936427	chr11	17143991	207564	chr14:46838810-46839030	chr14	46635433	203377	chr7:27299362-27299572	chr7	27064921	234441
chr3:110616512-110616665	ENSG00000177707	110788918	172253	chr11:60107192-60107343	chr11	62144557	2037214	chr33:15744553-15744703	chr33	15871172	126469	chr19:46487173-46487324	chr19	46336940	150233	chr1:56172798-56172950	chr1	56308185	135235
chr4:150646439-150646534	ENSG00000170390	150999426	352892	chr19:47361402-47361497	chr2	-	-	chr15:47808261-47808356	chr15	48119273	310917	chr2:83563869-83563964	chr2	83278289	285580	chr17:8117433-8117528	chr17	7742116	375317
chr8:20576739-20576848	ENSG00000061337	20161474	415265	chr15:57471054-57471164	chr16	-	-	chr25:36384524-36384634	chr25	36804789	420155	chr2:49762328-49762438	chr2	49368485	393843	chr8:68420608-68420720	chr8	67867782	552826
chr9:107166513-107166666	ENSG00000186881	107266455	99789	chr5:73485080-73485228	chr5	69134585	4350495	chr11:60395530-60395683	chr11	60467149	71466	chr25:10345146-10345297	chr25	10431380	86083	chr8:95666866-95667020	chr8	95761536	94516
chr5:50823263-50823420	ENSG00000016082	50678921	144342	chr2:69804396-69804554	chr2	66884387	2920009	chr4:63508093-63508251	chr4	63648648	140397	chr21:20153028-20153186	chr21	20306385	153199	chr20:27570174-27570332	chr20	27755504	185172
chr5:117827258-117827328	ENSG00000169570	118324240	496912	chr18:42999043-42999113	chr14	-	-	chr11:7986759-7986829	chr11	8346507	359678	chr14:54492887-54492957	chr14	54153274	339613	chr7:36592859-36592929	chr7	36230534	362325
chr4:46722172-46722425	ENSG00000170516	46911252	188827	chr14:39181778-39182032	chr10	-	-	chr13:42735011-42735277	chr13	42740224	4947	chr3:82000796-82001053	chr3	81994410	6386	chr6:66969030-66969295	chr6	66982463	13168
chr18:53864629-53864842	ENSG00000091157	54318574	453732	chr18:63807011-63807225	chr18	58326472	5480539	chr1:19544699-19544913	chr1	19157893	386806	chr8:73742270-73742484	chr8	74126513	384029	chr24:56048529-56048742	chr24	56467339	418597
chr16:56040101-56040263	ENSG00000159398	55989943	50158	chr19:11828776-11828937	chr19	23219489	11390552	chr2:60140192-60140354	chr2	60164386	24032	chr3:8474584-8474745	chr3	8447588	26996	chr18:24682277-24682436	chr18	24711578	29142
chr2:138295946-138296183	ENSG00000150540	138721590	425407	chr13:51881906-51882152	chr3	-	-	chr19:40204633-40204876	chr19	40656232	451356	chr18:21158164-21158404	chr18	21516160	357756	chr2:59903873-59904108	chr2	59417441	486432
chr1:81592664-81593112	ENSG00000117114	81771845	178733	chr2:273384248-273384694	chr2	277602151	4217457	chr6:66367325-66367772	chr6	66216074	151251	chr5:82232064-82232511	chr5	81707657	524407	chr3:63542272-63542719	chr3	63355165	187107
chr5:50821689-50821974	ENSG00000016082	50678921	142768	chr2:69805782-69806056	chr2	66884387	2921395	chr4:63509574-63509857	chr4	63648648	138791	chr21:20154483-20154769	chr21	20306385	151616	chr20:27572184-27572484	chr20	27755504	183020
chr9:22798437-22798724	ENSG00000176399	22446840	351597	chr5:114353995-114354275	chr5	112243551	2110444	chr11:41825163-41825450	chr11	41566167	258996	chr23:41593212-41593501	chr23	41325540	267672	chr8:21432565-21432853	chr8	21768203	335350
chr2:161785532-161786064	ENSG00000136560	161993419	207355	chr13:86192643-86193223	chr3	-	-	chr36:6545934-6546471	chr36	6769333	222862	chr18:41512695-41513230	chr18	41680812	167582	chr2:35578449-35578976	chr2	35343041	235408
chr5:85934906-85935007	ENSG00000145715	86563705	628698	chr2:375240-375341	chr2	13551335	13175994	chr3:21676561-21676662	chr3	21176910	499651	chr14:80352869-80352970	chr14	79903058	449811	chr7:88678117-88678218	chr7	89281001	602783
chr1:81692043-81692138	ENSG00000117114	81771845	79707	chr2:273309555-273309648	chr2	277602151	4292503	chr6:66289222-66289317	chr6	66216074	73148	chr5:82156760-82156855	chr5	81707657	449103	chr3:63452420-63452515	chr3	63355165	97255
chr2:220977051-220977286	ENSG00000124006	220436581	540470	chr9:89506390-89506626	chr9	82469082	7037308	chr37:26532928-26533163	chr37	26079752	453176	chr6:9516904-9517139	chr6	9063215	453689	chr2:108763988-108764221	chr2	108226115	537873
chr4:150681498-150681677	ENSG00000170390	150999426	317749	chr19:47416184-47416363	chr2	-	-	chr15:47841667-47841842	chr15	48119273	277431	chr2:83525294-83525474	chr2	83278289	247005	chr17:8067611-8067790	chr17	7742116	325495
chr1:222246709-222247049	ENSG00000143507	221915518	331191	chr13:106805844-106806183	chr13	108932783	2126600	chr38:16501504-16501838	chr38	16233730	267774	chr30:11997405-11997748	chr30	11729570	267835	chr16:26326623-26326960	chr16	25936963	389660
chr3:16430815-16430947	ENSG00000154814	16306706	124109	chr9:11806454-11806584	chr16	-	-	chr23:26398389-26398521	chr23	26516070	117549	chr16:65200899-65201029	chr16	65326619	125590	chr1:155130843-155130972	chr1	155020422	110421
chr9:104630057-104630119	ENSG00000198785	104500862	129195	chr5:71971436-71971498	chr5	69564696	2406740	chr11:58554799-58554861	chr11	58422278	132521	chr25:8171407-8171469	chr25	8054706	116701	chr8:93343480-93343542	chr8	93146121	197359
chr5:51674322-51674448	ENSG00000213949	52083730	409282	chr2:66218160-66218281	chr2	71763917	5545636	chr4:62794530-62794656	chr4	62455624	338906	chr21:19468231-19468357	chr21	19153982	314249	chr20:26702688-26702814	chr20	26293313	409375
chr9:13878123-13878520	ENSG00000147862	14398982	520462	chr3:50104880-50105266	chr5	-	-	chr11:34366408-34366799	chr11	34674076	307277	chr23:34060896-34061292	chr23	34332092	270800	chr8:30422008-30422408	chr8	30010800	411208
chr1:81763066-81763136	ENSG00000117114	81771845	8709	chr2:273228972-273229044	chr2	277602151	4373107	chr6:66225273-66225343	chr6	66216074	9199	chr5:82093522-82093592	chr5	81707657	385865	chr3:63366181-63366265	chr3	63355165	11016
chr9:83119536-83119727	ENSG00000106829	82186688	932848	chr5:91082227-91082423	chr1	-	-	chr1:78565705-78565901	chr1	79269883	703982	chr23:11520192-11520388	chr23	12316041	795653	chr8:56705897-56706095	chr8	55837380	868517
chr6:14574697-14574774	ENSG00000112149	14117872	456825	chr17:23021089-23021167	chr17	26364943	3343776	chr35:13894694-13894772	chr35	13489273	405421	chr20:14031702-14031780	chr20	13617586	414116	chr23:41965326-41965403	chr23	42354680	389277
chr14:82305308-82305721	ENSG00000071537	82000205	305103	chr6:122857592-122858013	chr6	124868197	2010184	chr8:54091418-54091831	chr8	53824395	267023	chr24:26546660-26547073	chr24	26268415	278245	chr10:94335360-94335772	chr10	93965154	370206
chr5:106190050-106190101	ENSG00000184349	107006596	816495	chr9:106643369-106643420	chr9	109897850	3254430	chr3:5057337-5057388	chr3	4272185	785152	chr14:64171723-64171774	chr14	63631090	540633	chr7:108399723-108399774	chr7	109097540	697766
chr4:142828379-142828655	ENSG00000164136	142557752	270627	chr19:40418723-40418988	chr19	34544021	5874702	chr19:1245609-1245888	chr19	1352457	106569	chr2:89798431-89798695	chr2	89935123	136428	chr17:16192124-16192398	chr17	16363886	171488
chr5:98527037-98527099	ENSG00000153922	98262240	264797	chr9:101185650-101185710	chr1	-	-	chr3:11065698-11065759	chr3	11288970	223211	chr14:70274905-70274966	chr14	70498333	223367	chr7:100882647-100882707	chr7	100565742	316905
chr2:220899151-220899228	ENSG00000124006	220436581	462570	chr9:89426728-89426805	chr9	82469082	6957646	chr37:26463251-26463328	chr37	26079752	383499	chr6:9447342-9447419	chr6	9063215	384127	chr2:108678217-108678294	chr2	108226115	452102
chr8:64206156-64206536	ENSG00000185728	64081112	125044	chr3:133609310-133609710	chr2	-	-	chr29:13354204-13354584	chr29	13240349	113855	chr9:21498514-21498892	chr9	21612894	114002	chr14:29917368-29917750	chr14	29830727	86641
chr15:60104742-60104860	ENSG00000140299	59981733	123009	chr8:80471909-80472027	chr8	76675968	3795941	chr30:24647116-24647234	chr30	24546564	100552	chr1:131937853-131937971	chr1	132022504	84533	chr10:50500122-50500240	chr10	50628360	128120
chrX:76281165-76281350	ENSG00000196468	76709648	428298	chrX:77176808-77176993	chrX	55910572	21266236	chrX:59473316-59473501	chrX	59739397	265896	chrX:57231738-57231923	chrX	57443444	211521	chrX:80216291-80216475	chrX	79954814	261477
chr9:7266948-7267045	ENSG00000178445	6645650	621298	chr5:95268446-95268543	chr1	-	-	chr11:28180607-28180704	chr11	27584474	596133	chr23:28367249-28367346	chr23	27814482	552767	chr8:37850336-37850433	chr8	38468512	618079
chr1:234890490-234890556	ENSG00000168264	234745271	145219	chr6:41628742-41628818	chr19	-	-	chr4:5129312-5129378	chr4	5244838	115460	chr1:76503467-76503533	chr1	76635875	132342	chr28:7579334-7579400	chr28	7446966	132368
chr5:117606622-117606777	ENSG00000169570	118324240	717463	chr18:43607939-43608090	chr14	-	-	chr11:7820940-7821097	chr11	8346507	525410	chr14:54658136-54658292	chr14	54153274	504862	chr7:36808832-36808987	chr7	36230534	578298
chr6:14518650-14518826	ENSG00000112149	14117872	400778	chr17:22975933-22976112	chr17	26364943	3388831	chr35:13842977-13843153	chr35	13489273	353704	chr20:13979317-13979492	chr20	13617586	361731	chr23:42011411-42011587	chr23	42354680	343093
chr4:150334997-150335272	ENSG00000170390	150999426	664154	chr19:46643914-46644187	chr2	-	-	chr15:47531813-47532087	chr15	48119273	587186	chr2:83840860-83841135	chr2	83278289	562571	chr17:8446461-8446734	chr17	7742116	704345
chr3:62460212-62460373	ENSG00000153266	62359999	100213	chr15:19659831-19659988	chr15	16854938	2804893	chr20:28602439-28602600	chr20	28704683	102083	chr16:26595535-26595695	chr16	26692919	97224	chr22:38964182-38964339	chr22	39068358	104019
chr7:115131746-115132337	ENSG00000135272	114562209	569537	chr4:44152209-44152845	chr4	41790494	2361715	chr14:54571844-54572439	chr14	54063568	508276	chr4:72749369-72749963	chr4	72206834	542535	chr4:53261104-53261697	chr4	53854749	593052
chr14:85268935-85268986	ENSG00000185070	85996488	727502	chr15:86720334-86720386	chr6	-	-	chr8:56594622-56594673	chr8	57234800	640127	chr24:29095264-29095315	chr24	29756923	661608	chr10:97440742-97440793	chr10	98231497	790704
chr2:145926253-145926312	ENSG00000169554	145282147	644106	chr3:39107558-39107617	chr3	35196121	3911437	chr19:47175307-47175366	chr19	46550583	624724	chr18:28061185-28061244	chr18	27461817	599368	chr2:51545753-51545812	chr2	52274862	729050
chrX:130682238-130682344	ENSG00000171054	130677950	4288	chrX:137268240-137268347	chr1	-	-	chrX:102644471-102644574	chrX	102640011	4460	chrX:104609727-104609833	chrX	104605998	3729	chrX:15460666-15460771	chrX	15453981	6685
chr3:62520030-62520503	ENSG00000153266	62359999	160031	chr15:19604516-19604992	chr15	16854938	2749578	chr20:28543280-28543761	chr20	28704683	160922	chr16:26536532-26537006	chr16	26692919	155913	chr22:38904875-38905350	chr22	39068358	163008
chr18:54076506-54077153	ENSG00000091157	54318574	241421	chr18:63599104-63599757	chr18	58326472	5272632	chr1:19351006-19351663	chr1	19157893	193113	chr8:73937373-73938025	chr8	74126513	188488	chr24:56253056-56253717	chr24	56467339	213622
chr2:138400606-138400792	ENSG00000150540	138721590	320798	chr13:51964214-51964400	chr3	-	-	chr19:40293636-40293820	chr19	40656232	362412	chr18:21244088-21244274	chr18	21516160	271886	chr2:59778135-59778321	chr2	59417441	360694
chr18:53990347-53990398	ENSG00000091157	54318574	328176	chr18:63688215-63688266	chr18	58326472	5361743	chr1:19426740-19426793	chr1	19157893	268847	chr8:73860033-73860085	chr8	74126513	266428	chr24:56171509-56171561	chr24	56467339	295778
chr1:221377126-221377196	ENSG00000136630	221051699	325427	chr13:109327817-109327887	chr13	107320943	2006874	chr38:15822022-15822092	chr38	15538534	283488	chr30:11309423-11309493	chr30	11006987	302436	chr16:25407727-25407797	chr16	25059266	348461
chrX:130699551-130699656	ENSG00000171054	130677950	21601	chrX:137189377-137189482	chr1	-	-	chrX:102655839-102655941	chrX	102640011	15828	chrX:104621297-104621402	chrX	104605998	15299	chrX:15474104-15474208	chrX	15453981	20123
chr3:90082088-90082404	ENSG00000044524	89156674	925414	chr13:1518263-1518572	chr11	-	-	chr33:1465044-1465358	chr33	785725	679319	chr26:864873-865181	chr26	1656872	791691	chr1:37611171-37611485	chr1	36715182	895989
chr3:110589927-110589992	ENSG00000177707	110788918	198926	chr11:60083529-60083594	chr11	62144557	2060963	chr33:15719178-15719244	chr33	15871172	151928	chr19:46516163-46516228	chr19	46336940	179223	chr1:56143371-56143436	chr1	56308185	164749
chr9:109240705-109240948	ENSG00000148143	109625378	384430	chr5:77978355-77978595	chr5	75809671	2168684	chr11:62102996-62103241	chr11	62401696	298455	chr25:12367048-12367292	chr25	12656077	288785	chr8:97897957-97898197	chr8	98274178	375981
chr2:46346209-46346414	ENSG00000116016	46520806	174392	chr6:9822542-9822748	chr6	20299176	10476428	chr10:48400901-48401102	chr10	48550882	149780	chr15:52770462-52770667	chr15	52622187	148275	chr11:28409919-28410124	chr11	28575995	165871
chr2:59877957-59878090	ENSG00000119866	60780702	902612	chr14:105294966-105295099	chr14	108548256	3253157	chr10:59860062-59860191	chr10	60689285	829094	chr15:41340166-41340299	chr15	40536640	803526	chr11:42255678-42255811	chr11	43174031	918220
chr14:82284949-82285146	ENSG00000071537	82000205	284744	chr6:122842142-122842339	chr6	124868197	2025858	chr8:54074627-54074824	chr8	53824395	250232	chr24:26530762-26530958	chr24	26268415	262347	chr10:94313220-94313417	chr10	93965154	348066
chr9:83112170-83112660	ENSG00000106829	82186688	925482	chr5:91076319-91076808	chr1	-	-	chr1:78556995-78557466	chr1	79269883	712417	chr23:11525960-11526449	chr23	12316041	789592	chr8:56694025-56694517	chr8	55837380	856645
chr4:117673258-117673322	ENSG00000174599	118006736	333414	chr2:166165034-166165099	chr2	247895257	81730158	chr32:36095142-36095206	chr32	36489590	394384	chr2:110229503-110229567	chr2	109880266	349237	chr6:10001684-10001748	chr6	9455057	546627
chr12:67230175-67230244	ENSG00000155974	67197966	32209	chr7:62618381-62618449	chr7	64890312	2271863	chr10:9219225-9219293	chr10	9063901	155324	chr6:82206428-82206496	chr6	82051586	154842	chr5:47204368-47204436	chr5	47393104	188668
chr18:52815525-52816006	ENSG00000166510	52626739	188786	chr18:64755812-64756334	chr18	67564699	2808365	chr1:20472389-20472866	chr1	20641290	168424	chr8:72837166-72837642	chr8	72654605	182561	chr24:54987848-54988326	chr24	54786447	201401
chr5:157973798-157973853	ENSG00000164330	158526769	552916	chr10:30135738-30135793	chr10	23523689	6612049	chr4:51893551-51893606	chr4	51378963	514588	chr14:20905160-20905215	chr14	20400279	504881	chr7:72242678-72242733	chr7	72804182	561449
chr3:19857110-19857457	ENSG00000163576	19988517	131060	chr11:84763240-84763588	chr9	-	-	chr23:23440336-23440684	chr23	23338240	102096	chr16:62313786-62314135	chr16	62228509	85277	chr1:44600342-44600680	chr1	44712296	111616
chr5:102725610-102725876	ENSG00000181751	102594403	131207	chr9:105088171-105088435	chr9	110878884	5790449	chr3:7861391-7861655	chr3	7967907	106252	chr14:66911708-66911969	chr14	67030817	118848	chr7:104832861-104833121	chr7	104692816	140045
chr4:23708663-23708804	ENSG00000109606	24586173	877369	chr14:63371092-63371232	chr14	61248770	2122322	chr3:86354762-86354902	chr3	85549939	804823	chr3:100947240-100947380	chr3	100177256	769984	chr6:44755407-44755547	chr6	45683587	928040
chr9:106668051-106668158	ENSG00000136824	106856541	188383	chr5:69755924-69756034	chr5	73151949	3395915	chr11:59948136-59948243	chr11	60091674	143431	chr25:9902197-9902305	chr25	10059214	156909	chr8:95172104-95172211	chr8	95362953	190742
chr2:220751711-220751994	ENSG00000124006	220436581	315130	chr9:89265308-89265588	chr9	82469082	6796226	chr37:26335324-26335598	chr37	26079752	255572	chr6:9314735-9315015	chr6	9063215	251520	chr2:108524728-108525009	chr2	108226115	298613
chr3:90144938-90145086	ENSG00000044524	89156674	988264	chr13:1412624-1412772	chr11	-	-	chr33:1540146-1540298	chr33	785725	754421	chr26:800211-800358	chr26	1656872	856514	chr1:37688996-37689145	chr1	36715182	973814
chr7:114999358-114999916	ENSG00000135272	114562209	437149	chr4:44001671-44002231	chr4	41790494	2211177	chr14:54453776-54454346	chr14	54063568	390208	chr4:72617725-72618285	chr4	72206834	410891	chr4:53390924-53391486	chr4	53854749	463263
chr1:81610264-81610323	ENSG00000117114	81771845	161522	chr2:273363131-273363189	chr2	277602151	4238962	chr6:66349260-66349319	chr6	66216074	133186	chr5:82216174-82216233	chr5	81707657	508517	chr3:63519472-63519530	chr3	63355165	164307
chr8:20481126-20481231	ENSG00000061337	20161474	319652	chr15:57673699-57673804	chr16	-	-	chr25:36473534-36473639	chr25	36804789	331150	chr2:49676373-49676478	chr2	49368485	307888	chr8:68291414-68291514	chr8	67867782	423632
chr2:59192676-59192731	ENSG00000115392	58468507	724169	chr14:105934782-105934837	chr14	110369224	4434387	chr10:59274595-59274650	chr10	58632368	642227	chr15:41918336-41918390	chr15	42591277	672887	chr11:41533410-41533465	chr11	40744419	788991
chr4:150190824-150191210	ENSG00000170390	150999426	808216	chr19:46486262-46486660	chr2	-	-	chr15:47412992-47413381	chr15	48119273	705892	chr2:83962745-83963132	chr2	83278289	684456	chr17:8616146-8616534	chr17	7742116	874030
chr5:117771714-117771764	ENSG00000169570	118324240	552476	chr18:42920081-42920131	chr14	-	-	chr11:7939219-7939269	chr11	8346507	407238	chr14:54541097-54541147	chr14	54153274	387823	chr7:36651022-36651072	chr7	36230534	420488
chr3:64147479-64147579	ENSG00000163636	64009658	137821	chr4:188958375-188958475	chr15	-	-	chr20:27076055-27076155	chr20	27206629	130474	chr16:25126807-25126906	chr16	25253011	126105	chr22:37385320-37385420	chr22	37538013	152593
chr5:106198632-106199131	ENSG00000184349	107006596	807465	chr9:106634969-106635471	chr9	109897850	3262379	chr3:5050549-5051038	chr3	4272185	778364	chr14:64163670-64164174	chr14	63631090	532580	chr7:108316453-108316946	chr7	109097540	780594
chr2:215474558-215474620	ENSG00000174453	215275789	198769	chr9:75499736-75499798	chr9	77609106	2109308	chr37:21875256-21875318	chr37	21691600	183656	chr6:4891423-4891485	chr6	4703192	188231	chr2:103170602-103170664	chr2	102927401	243201
chr7:112214055-112214234	ENSG00000181016	112120908	93147	chr4:39675013-39675196	chr6	-	-	chr14:52168228-52168414	chr14	52085924	82304	chr4:70374836-70375020	chr4	70283380	91456	chr4:55790250-55790433	chr4	55864841	74408
chr9:7391365-7391433	ENSG00000178445	6645650	745715	chr5:95560060-95560129	chr1	-	-	chr11:28274822-28274890	chr11	27584474	690348	chr23:28461550-28461618	chr23	27814482	647068	chr8:37726040-37726108	chr8	38468512	742404
chr2:59219534-59219596	ENSG00000115392	58468507	751027	chr14:105912688-105912750	chr14	110369224	4456474	chr10:59296852-59296914	chr10	58632368	664484	chr15:41892879-41892941	chr15	42591277	698336	chr11:41568246-41568308	chr11	40744419	823827
chr18:54098791-54098931	ENSG00000091157	54318574	219643	chr18:63592608-63592760	chr18	58326472	5266136	chr1:19338516-19338663	chr1	19157893	180623	chr8:73947357-73947504	chr8	74126513	179009	chr24:56265539-56265685	chr24	56467339	201654
chr9:76445951-76446174	ENSG00000198963	77112281	666107	chr1:244554582-244554804	chr1	241354363	3200219	chr1:84203789-84204012	chr1	83666066	537723	chr23:17053493-17053716	chr23	17582328	528612	chr8:50266987-50267210	chr8	50874906	607696
chr11:79409184-79409242	ENSG00000149256	79151992	257192	chr1:159774189-159774247	chr1	167398961	7624714	chr21:19246668-19246726	chr21	19502511	255785	chr7:64962003-64962061	chr7	65193196	231135	chr29:16352394-16352452	chr29	16642421	289969
chr2:220866357-220866418	ENSG00000124006	220436581	429776	chr9:89379380-89379443	chr9	82469082	6910298	chr37:26430480-26430541	chr37	26079752	350728	chr6:9418455-9418516	chr6	9063215	355240	chr2:108640849-108640909	chr2	108226115	414734
chrX:76237582-76237843	ENSG00000196468	76709648	471805	chrX:77153197-77153458	chrX	55910572	21242625	chrX:59456686-59456950	chrX	59739397	282447	chrX:57216923-57217183	chrX	57443444	226261	chrX:80256362-80256622	chrX	79954814	301548
chr4:23743226-23743289	ENSG00000109606	24586173	842884	chr14:63336346-63336408	chr14	61248770	2087576	chr3:86326872-86326934	chr3	85549939	776933	chr3:100921252-100921313	chr3	100177256	743996	chr6:44786767-44786829	chr6	45683587	896758
chr4:142845821-142845885	ENSG00000164136	142557752	288069	chr19:40439491-40439556	chr19	34544021	5895470	chr19:1230765-1230830	chr19	1352457	121627	chr2:89782603-89782668	chr2	89935123	152455	chr17:16173304-16173369	chr17	16363886	190517
chr9:106465015-106465187	ENSG00000136824	106856541	391354	chr5:70010838-70011010	chr5	73151949	3140939	chr11:59780601-59780772	chr11	60091674	310902	chr25:9719501-9719673	chr25	10059214	339541	chr8:94943777-94943949	chr8	95362953	419004
chr4:150202195-150202256	ENSG00000170390	150999426	797170	chr19:46506695-46506756	chr2	-	-	chr15:47422793-47422853	chr15	48119273	696420	chr2:83952967-83953028	chr2	83278289	674678	chr17:8588504-8588565	chr17	7742116	846388
chr1:222318683-222318746	ENSG00000143512	222721445	402699	chr13:106755680-106755741	chr13	101018647	5737033	chr38:16545473-16545536	chr38	16818334	272798	chr30:12058469-12058532	chr30	12368988	310456	chr16:26408837-26408948	chr16	26741134	332186
chr12:65940672-65941134	ENSG00000174099	65672423	268249	chr7:65714211-65714670	chr7	62954845	2759366	chr10:8124044-8124507	chr10	7911920	212124	chr6:81174919-81175380	chr6	80995064	179855	chr5:48458863-48459330	chr5	48702835	243505
chr9:106784729-106784851	ENSG00000136824	106856541	71690	chr5:69606289-69606409	chr5	73151949	3545540	chr11:60036782-60036903	chr11	60091674	54771	chr25:10010588-10010709	chr25	10059214	48505	chr8:95303703-95303824	chr8	95362953	59129
chr16:73771597-73772047	ENSG00000140836	73093597	678000	chr19:51022414-51022858	chr19	53739472	2716614	chr5:79286244-79286690	chr5	78610027	676217	chr3:20413197-20413641	chr3	21001311	587670	chr18:37636962-37637411	chr18	38186022	548611
chr16:51861700-51861882	ENSG00000103449	51185278	676422	chr19:29862892-29863077	chr19	34379537	4516460	chr2:63649220-63649405	chr2	64244559	595154	chr3:4571057-4571242	chr3	3987210	583847	chr18:20380905-20381090	chr18	19654593	726312
chr5:117728686-117729058	ENSG00000169570	118324240	595182	chr18:42879358-42879737	chr14	-	-	chr11:7905274-7905662	chr11	8346507	440845	chr14:54567473-54567857	chr14	54153274	414199	chr7:36683206-36683587	chr7	36230534	452672
chr11:79534375-79534460	ENSG00000149256	79151992	382383	chr1:159661545-159661632	chr1	167398961	7737329	chr21:19145466-19145572	chr21	19502511	356939	chr7:64860304-64860388	chr7	65193196	332808	chr29:16222534-16222619	chr29	16642421	419802
chr5:51688358-51688413	ENSG00000213949	52083730	395317	chr2:66203375-66203430	chr2	71763917	5560487	chr4:62782256-62782310	chr4	62455624	326632	chr21:19455879-19455934	chr21	19153982	301897	chr20:26689122-26689177	chr20	26293313	395809
chr2:221238198-221238509	ENSG00000124006	220436581	801617	chr9:89761107-89761424	chr9	82469082	7292025	chr37:26753377-26753695	chr37	26079752	673625	chr6:9752447-9752763	chr6	9063215	689232	chr2:109062256-109062573	chr2	108226115	836141
chr2:221925178-221925426	ENSG00000116106	222438922	513496	chr9:90415229-90415479	chr9	83022498	7392731	chr37:27342859-27343107	chr37	27805314	462207	chr6:10338843-10339088	chr6	10795190	456102	chr2:109838971-109839216	chr2	110405363	566147
chr11:79492544-79492814	ENSG00000149256	79151992	340552	chr1:159714534-159714807	chr1	167398961	7684154	chr21:19180479-19180745	chr21	19502511	321766	chr7:64895516-64895784	chr7	65193196	297412	chr29:16269730-16270000	chr29	16642421	372421
chr13:103584007-103584199	ENSG00000134897	103451399	132608	chr16:89925041-89925232	chr9	-	-	chr22:52422245-52422437	chr22	52316530	105715	chr17:71482931-71483123	chr17	71360665	122266	chr12:83151483-83151676	chr12	83016461	135022
chr9:83082194-83082303	ENSG00000106829	82186688	895506	chr5:91051488-91051592	chr1	-	-	chr1:78540057-78540163	chr1	79269883	729720	chr23:11552234-11552343	chr23	12316041	763698	chr8:56668089-56668198	chr8	55837380	830709
chr2:161834099-161834220	ENSG00000136560	161993419	159199	chr13:86143364-86143488	chr3	-	-	chr36:6595373-6595497	chr36	6769333	173836	chr18:41554338-41554462	chr18	41680812	126350	chr2:35507055-35507179	chr2	35343041	164014
chr18:52694514-52694955	ENSG00000166510	52626739	67775	chr18:64874356-64874789	chr18	67564699	2689910	chr1:20580365-20580810	chr1	20641290	60480	chr8:72727318-72727758	chr8	72654605	72713	chr24:54852531-54852966	chr24	54786447	66084
chr1:81663925-81664037	ENSG00000117114	81771845	107808	chr2:273329664-273329777	chr2	277602151	4272374	chr6:66317220-66317329	chr6	66216074	101146	chr5:82185863-82185972	chr5	81707657	478206	chr3:63482178-63482285	chr3	63355165	127013
chr5:117786431-117786558	ENSG00000169570	118324240	537682	chr18:42939717-42939843	chr14	-	-	chr11:7952903-7953031	chr11	8346507	393476	chr14:54527697-54527825	chr14	54153274	374423	chr7:36635383-36635512	chr7	36230534	404849
chrX:113386627-113386707	ENSG00000147246	113818551	431844	chrX:36644447-36644527	chrX	118225792	81581265	chrX:86984660-86984737	chrX	87342807	358070	chrX:90344679-90344759	chrX	90649497	304738	chrX:67387701-67387782	chrX	67739107	351325
chr12:65893964-65894044	ENSG00000174099	65672423	221541	chr7:65772914-65772993	chr7	62954845	2818069	chr10:8074517-8074597	chr10	7911920	162597	chr6:81130061-81130141	chr6	80995064	134997	chr5:48515457-48515537	chr5	48702835	187298
chr16:73538948-73539195	ENSG00000140836	73093597	445351	chr19:51220263-51220510	chr19	53739472	2518962	chr5:79077115-79077362	chr5	78610027	467088	chr3:20616268-20616512	chr3	21001311	384799	chr18:37851411-37851657	chr18	38186022	334365
chr9:104530838-104531077	ENSG00000198785	104500862	29976	chr5:72108443-72108678	chr5	69564696	2543747	chr11:58451861-58452101	chr11	58422278	29583	chr25:8086970-8087211	chr25	8054706	32264	chr8:93209728-93209967	chr8	93146121	63607
chr8:117651675-117651941	ENSG00000147679	117778742	126801	chr6:116792471-116792737	chr7	-	-	chr13:16100758-16101027	chr13	16213190	112163	chr9:60118670-60118939	chr9	60233194	114255	chr14:49835799-49836064	chr14	49714027	121772
chr3:62464974-62465489	ENSG00000153266	62359999	104975	chr15:19654805-19655317	chr15	16854938	2799867	chr20:28597285-28597797	chr20	28704683	106886	chr16:26590552-26591065	chr16	26692919	101854	chr22:38959057-38959571	chr22	39068358	108787
chr2:59202070-59202216	ENSG00000115392	58468507	733563	chr14:105926620-105926767	chr14	110369224	4442457	chr10:59283825-59283972	chr10	58632368	651457	chr15:41909047-41909193	chr15	42591277	682084	chr11:41544498-41544644	chr11	40744419	800079
chr16:73358836-73358895	ENSG00000140836	73093597	265239	chr19:51528392-51528451	chr19	53739472	2211021	chr5:78918669-78918728	chr5	78610027	308642	chr3:20775124-20775183	chr3	21001311	226128	chr18:38012160-38012220	chr18	38186022	173802
chr2:138251125-138251204	ENSG00000150540	138721590	470386	chr13:51817472-51817552	chr3	-	-	chr19:40163455-40163534	chr19	40656232	492698	chr18:21117501-21117580	chr18	21516160	398580	chr2:59962873-59962952	chr2	59417441	545432
chr5:98446446-98446594	ENSG00000153922	98262240	184206	chr9:101032201-101032389	chr1	-	-	chr3:11132362-11132507	chr3	11288970	156463	chr14:70342676-70342824	chr14	70498333	155509	chr7:100786551-100786894	chr7	100565742	220809
chr11:79675424-79675637	ENSG00000149256	79151992	523432	chr1:159540723-159540935	chr1	167398961	7858026	chr21:19018787-19019000	chr21	19502511	483511	chr7:64738383-64738596	chr7	65193196	454600	chr29:16068621-16068827	chr29	16642421	573594
chr3:62526122-62526467	ENSG00000153266	62359999	166123	chr15:19598376-19598715	chr15	16854938	2743438	chr20:28537218-28537565	chr20	28704683	167118	chr16:26530629-26530974	chr16	26692919	161945	chr22:38898973-38899320	chr22	39068358	169038
chr4:130847852-130848167	ENSG00000151466	130014764	833088	chr2:153268102-153268415	chr2	148271696	4996406	chr19:11199269-11199584	chr19	12001306	801722	chr2:99469977-99470292	chr2	100183877	713585	chr17:28160177-28160492	chr17	29126352	965860
chr2:220809852-220810155	ENSG00000124006	220436581	373271	chr9:89324216-89324519	chr9	82469082	6855134	chr37:26383282-26383586	chr37	26079752	303530	chr6:9360764-9361069	chr6	9063215	297549	chr2:108582925-108583230	chr2	108226115	356810
chr7:42472372-42472452	ENSG00000106571	42277469	194903	chr2:111856342-111856422	chr17	-	-	chr18:7618897-7618978	chr18	7800858	181880	chr4:13557212-13557290	chr4	13366275	190937	chr4:79233336-79233417	chr4	79444274	210857
chr2:145893517-145894044	ENSG00000169554	145282147	611370	chr3:39075514-39076042	chr3	35196121	3879393	chr19:47140756-47141285	chr19	46550583	590173	chr18:28029007-28029536	chr18	27461817	567190	chr2:51586621-51587150	chr2	52274862	687712
chr3:110625881-110625998	ENSG00000177707	110788918	162920	chr11:60115750-60115869	chr11	62144557	2028688	chr33:15754394-15754511	chr33	15871172	116661	chr19:46479547-46479663	chr19	46336940	142607	chr1:56180967-56181080	chr1	56308185	127105
chr6:104855847-104856120	ENSG00000085382	105307794	451674	chr19:61983327-61983604	chr20	-	-	chr12:61919761-61920029	chr12	62329980	409951	chr10:54866518-54866791	chr10	55242806	376015	chr9:46219178-46219446	chr9	45744424	474754
chr1:222216970-222217120	ENSG00000143507	221915518	301452	chr13:106833518-106833671	chr13	108932783	2099112	chr38:16478152-16478304	chr38	16233730	244422	chr30:11973821-11973975	chr30	11729570	244251	chr16:26296861-26297012	chr16	25936963	359898
chrX:113751037-113751120	ENSG00000147246	113818551	67431	chrX:37011775-37011858	chrX	118225792	81213934	chrX:87288720-87288801	chrX	87342807	54006	chrX:90596753-90596836	chrX	90649497	52661	chrX:67670467-67670550	chrX	67739107	68557
chr3:148010200-148010381	ENSG00000144891	148415571	405190	chr8:97255007-97255187	chr2	-	-	chr23:43261940-43262122	chr23	43613937	351815	chr16:81240389-81240572	chr16	81548815	308243	chr1:120853524-120853707	chr1	120445395	408129
chr13:110064846-110064903	ENSG00000185950	110438915	374012	chr5:170448083-170448139	chr16	-	-	chr22:57928232-57928289	chr22	58227450	299161	chr17:76913652-76913709	chr17	77239776	326067	chr12:88434495-88434552	chr12	88669589	235037
chr2:46248828-46248902	ENSG00000116016	46520806	271904	chr6:9735331-9735405	chr6	20299176	10563771	chr10:48322923-48322997	chr10	48550882	227885	chr15:52852617-52852691	chr15	52622187	230430	chr11:28318399-28318473	chr11	28575995	257522
chr7:115099343-115099555	ENSG00000135272	114562209	537134	chr4:44115966-44116180	chr4	41790494	2325472	chr14:54536792-54537004	chr14	54063568	473224	chr4:72716484-72716696	chr4	72206834	509650	chr4:53300347-53300564	chr4	53854749	554185
chr17:30105606-30105678	ENSG00000172301	30186356	80678	chr10:64437945-64438016	chr16	-	-	chr9:41166645-41166719	chr9	41102890	63755	chr11:40652523-40652595	chr11	40600927	51596	chr19:18671639-18671712	chr19	18604845	66794
chr2:221862619-221862684	ENSG00000116106	222438922	576238	chr9:90355218-90355282	chr9	83022498	7332720	chr37:27287791-27287856	chr37	27805314	517458	chr6:10289127-10289193	chr6	10795190	505997	chr2:109772790-109772855	chr2	110405363	632508
chr2:145896335-145896385	ENSG00000169554	145282147	614188	chr3:39078180-39078230	chr3	35196121	3882059	chr19:47144821-47144869	chr19	46550583	594238	chr18:28031707-28031757	chr18	27461817	569890	chr2:51584182-51584232	chr2	52274862	690630
chr18:54232717-54233329	ENSG00000091157	54318574	85245	chr18:63456612-63457222	chr18	58326472	5130140	chr1:19227286-19227876	chr1	19157893	69393	chr8:74053566-74054179	chr8	74126513	72334	chr24:56383021-56383631	chr24	56467339	83708
chr3:62499481-62499820	ENSG00000153266	62359999	139482	chr15:19622871-19623204	chr15	16854938	2767933	chr20:28566435-28566775	chr20	28704683	137908	chr16:26558617-26558957	chr16	26692919	133962	chr22:38927375-38927716	chr22	39068358	140642
chr9:106664117-106664383	ENSG00000136824	106856541	192158	chr5:69764758-69765024	chr5	73151949	3386925	chr11:59943168-59943435	chr11	60091674	148239	chr25:9898632-9898899	chr25	10059214	160315	chr8:95168745-95169023	chr8	95362953	193930
chr4:23708833-23709541	ENSG00000109606	24586173	876632	chr14:63370357-63371062	chr14	61248770	2121587	chr3:86354024-86354733	chr3	85549939	804085	chr3:100946495-100947210	chr3	100177256	769239	chr6:44755576-44756282	chr6	45683587	927305
chr1:81434148-81434406	ENSG00000117114	81771845	337439	chr2:273589836-273590093	chr2	277602151	4012058	chr6:66514195-66514452	chr6	66216074	298121	chr5:82369948-82370204	chr5	81707657	662291	chr3:63720360-63720618	chr3	63355165	365195
chr2:221327230-221327358	ENSG00000124006	220436581	890649	chr9:89830063-89830190	chr9	82469082	7360981	chr37:26821424-26821551	chr37	26079752	741672	chr6:9820765-9820893	chr6	9063215	757550	chr2:109148995-109149123	chr2	108226115	922880
chr8:132001193-132001276	ENSG00000153317	131455906	545287	chr7:105490555-105490638	chr7	91990638	13499917	chr13:27883430-27883513	chr13	27430768	452662	chr9:72054053-72054136	chr9	71598463	455590	chr14:10867130-10867211	chr14	11327900	460689
chr2:84183915-84184207	ENSG00000163541	84687169	502962	chr4:168878436-168878726	chr4	165937928	2940508	chr17:40754212-40754503	chr17	40393146	361066	chr15:20247260-20247552	chr15	19834367	412893	chr11:51033246-51033537	chr11	50400444	632802
chr9:106408259-106408383	ENSG00000136824	106856541	448158	chr5:70100900-70101022	chr5	73151949	3050927	chr11:59715299-59715422	chr11	60091674	376252	chr25:9649518-9649642	chr25	10059214	409572	chr8:94839699-94839821	chr8	95362953	523132
chr5:50786694-50786814	ENSG00000016082	50678921	107773	chr2:69840436-69840556	chr2	66884387	2956049	chr4:63530578-63530698	chr4	63648648	117950	chr21:20193576-20193696	chr21	20306385	112689	chr20:27613613-27613733	chr20	27755504	141771
chr2:220867287-220867527	ENSG00000124006	220436581	430706	chr9:89380272-89380512	chr9	82469082	6911190	chr37:26431526-26431766	chr37	26079752	351774	chr6:9419348-9419588	chr6	9063215	356133	chr2:108641798-108642039	chr2	108226115	415683
chr13:77987161-77987311	ENSG00000005810	77901185	85976	chr15:91105784-91105939	chr15	97355787	6249848	chr22:30954783-30954933	chr22	30874140	80643	chr17:50207641-50207791	chr17	50130810	76831	chr12:52892757-52892907	chr12	52769559	123198
chr3:62466288-62466552	ENSG00000153266	62359999	106289	chr15:19653717-19653986	chr15	16854938	2798779	chr20:28596214-28596483	chr20	28704683	108200	chr16:26589470-26589748	chr16	26692919	103171	chr22:38957972-38958241	chr22	39068358	110117
chr8:36216621-36216786	ENSG00000215262	36641842	425056	chr16:67702861-67703021	chr16	70663273	2960252	chr16:28817923-28818088	chr16	28478384	339539	chr27:9037469-9037634	chr27	8699565	337904	chr27:31504521-31504687	chr27	31849126	344439
chr4:134330756-134330835	ENSG00000138650	134070470	260286	chr2:150914509-150914586	chr2	156481915	5567329	chr19:8510446-8510525	chr19	8732650	222125	chr2:96867349-96867428	chr2	97081807	214379	chr17:25247637-25247716	chr17	25495147	247431
chr18:28777878-28777992	ENSG00000134765	28742819	35059	chr18:17666633-17666744	chr18	11706307	5960326	chr7:58290882-58290994	chr7	58322958	31964	chr8:52146613-52146723	chr8	52111652	34961	chr24:26238617-26238729	chr24	26283414	44685
chr2:221077312-221077641	ENSG00000124006	220436581	640731	chr9:89590764-89591093	chr9	82469082	7121682	chr37:26616912-26617241	chr37	26079752	537160	chr6:9603585-9603918	chr6	9063215	540370	chr2:108876487-108876814	chr2	108226115	650372
chr6:14613739-14613897	ENSG00000112149	14117872	495867	chr17:23064597-23064755	chr17	26364943	3300188	chr35:13930311-13930466	chr35	13489273	441038	chr20:14075272-14075430	chr20	13617586	457686	chr23:41927150-41927308	chr23	42354680	427372
chr16:56099560-56099727	ENSG00000159398	55989943	109617	chr19:11768267-11768433	chr19	23219489	11451056	chr2:60096861-60097029	chr2	60164386	67357	chr3:8522241-8522409	chr3	8447588	74653	chr18:24639286-24639453	chr18	24711578	72125
chr12:65928170-65928375	ENSG00000174099	65672423	255747	chr7:65727060-65727265	chr7	62954845	2772215	chr10:8110999-8111206	chr10	7911920	199079	chr6:81163328-81163532	chr6	80995064	168264	chr5:48475211-48475416	chr5	48702835	227419
chrX:130743104-130743360	ENSG00000171054	130677950	65154	chrX:137615458-137615719	chr1	-	-	chrX:102704647-102704926	chrX	102640011	64636	chrX:104665309-104665564	chrX	104605998	59311	chrX:15520954-15521209	chrX	15453981	66973
chr9:22741047-22741264	ENSG00000176399	22446840	294207	chr5:114413843-114414061	chr5	112243551	2170292	chr11:41792701-41792919	chr11	41566167	226534	chr23:41559787-41560004	chr23	41325540	234247	chr8:21488516-21488734	chr8	21768203	279469
chr7:42718033-42718108	ENSG00000136197	42951904	233796	chr17:53689707-53689782	chr17	50782041	2907666	chr18:7399021-7399097	chr18	7233303	165718	chr4:13766059-13766134	chr4	13919887	153753	chr4:79007616-79007692	chr4	78839309	168307
chr3:177032897-177033010	ENSG00000177565	176915261	117636	chr2:129145465-129145576	chr2	127025374	2120091	chr34:40808868-40808982	chr34	40612783	196085	chr19:16813835-16813946	chr19	16734808	79027	chr1:90345868-90345979	chr1	90428231	82252
chr13:23347928-23347992	ENSG00000102683	23755091	407099	chr15:43342140-43342204	chr15	45385876	2043672	chr25:15696847-15696911	chr25	15403190	293657	chr17:3433498-3433562	chr17	3857467	423905	chr12:35035270-35035333	chr12	34954970	80300
chr3:62522374-62522839	ENSG00000153266	62359999	162375	chr15:19602219-19602722	chr15	16854938	2747281	chr20:28540855-28541363	chr20	28704683	163320	chr16:26534206-26534676	chr16	26692919	158243	chr22:38902552-38903024	chr22	39068358	165334
chr5:102026717-102026973	ENSG00000145730	102089685	62712	chr9:104651907-104652167	chr9	110737325	6085158	chr3:8483004-8483259	chr3	8290489	192515	chr14:67531724-67531979	chr14	67474600	57124	chr7:104110686-104110939	chr7	104175550	64611
chr3:177520121-177520189	ENSG00000197584	177990720	470531	chr2:126432902-126432970	chr2	137954821	11521851	chr34:41180740-41180806	chr34	41963562	782756	chr19:17211544-17211611	chr19	17863925	652314	chr1:89870649-89870717	chr1	89080346	790303
chr2:221774628-221774906	ENSG00000116106	222438922	664016	chr9:90278815-90279091	chr9	83022498	7256317	chr37:27205675-27205947	chr37	27805314	599367	chr6:10204140-10204416	chr6	10795190	590774	chr2:109649356-109649631	chr2	110405363	755732
chr2:221870026-221870390	ENSG00000116106	222438922	568532	chr9:90362170-90362528	chr9	83022498	7339672	chr37:27294784-27295147	chr37	27805314	510167	chr6:10295316-10295680	chr6	10795190	499510	chr2:109781872-109782226	chr2	110405363	623137
chr5:98451432-98451577	ENSG00000153922	98262240	189192	chr9:101042100-101042543	chr1	-	-	chr3:11127495-11127639	chr3	11288970	161331	chr14:70338073-70338217	chr14	70498333	160116	chr7:100791872-100792016	chr7	100565742	226130
chr3:89978384-89978601	ENSG00000044524	89156674	821710	chr13:1598801-1599019	chr11	-	-	chr33:1408573-1408790	chr33	785725	622848	chr26:933027-933243	chr26	1656872	723629	chr1:37515009-37515226	chr1	36715182	799827
chr3:177726221-177726385	ENSG00000197584	177990720	264335	chr2:126180500-126180665	chr2	137954821	11774156	chr34:41325854-41326017	chr34	41963562	637545	chr19:17397129-17397293	chr19	17863925	466632	chr1:89602728-89602892	chr1	89080346	522382
chr5:51026107-51026256	ENSG00000016082	50678921	347186	chr2:69592951-69593100	chr2	66884387	2708564	chr4:63322885-63323034	chr4	63648648	325614	chr21:19970237-19970381	chr21	20306385	336004	chr20:27346613-27347422	chr20	27755504	408082
chr18:52720223-52720560	ENSG00000166510	52626739	93484	chr18:64855520-64855860	chr18	67564699	2708839	chr1:20561203-20561544	chr1	20641290	79746	chr8:72746334-72746670	chr8	72654605	91729	chr24:54881995-54882331	chr24	54786447	95548
chr9:22740536-22740598	ENSG00000176399	22446840	293696	chr5:114414509-114414574	chr5	112243551	2170958	chr11:41792197-41792259	chr11	41566167	226030	chr23:41559282-41559344	chr23	41325540	233742	chr8:21489192-21489254	chr8	21768203	278949
chr6:114427117-114427473	ENSG00000196591	114332472	94645	chr20:42231121-42231465	chr20	44827687	2596222	chr12:70183036-70183389	chr12	70072758	110278	chr10:63080865-63081218	chr10	62976771	104094	chr9:36802201-36802552	chr9	36918295	115743
chr6:163802696-163802986	ENSG00000112531	163835032	32046	chr1:49214709-49214993	chr1	52104730	2889737	chr1:51771501-51771791	chr1	51799714	27923	chr31:4743171-4743461	chr31	4808499	65038	chr9:100247618-100247906	chr9	100370771	122865
chr9:27386735-27386800	ENSG00000120160	27297137	89598	chr5:55058301-55058364	chr5	117826975	62768611	chr11:45514086-45514151	chr11	45431232	82854	chr23:45137984-45138049	chr23	45064606	73378	chr8:16893091-16893156	chr8	16979547	86391
chr5:102648761-102648829	ENSG00000181751	102594403	54358	chr9:105011852-105011919	chr9	110878884	5866965	chr3:7924348-7924417	chr3	7967907	43490	chr14:66979812-66979879	chr14	67030817	50938	chr7:104749439-104749506	chr7	104692816	56623
chr4:150384836-150385025	ENSG00000170390	150999426	614401	chr19:46719152-46719333	chr2	-	-	chr15:47583172-47583361	chr15	48119273	535912	chr2:83785203-83785393	chr2	83278289	506914	chr17:8381332-8381521	chr17	7742116	639216
chr2:112173921-112174027	ENSG00000153094	111876955	296966	chr3:129119815-129119920	chr3	126604489	2515326	chr17:35917828-35917934	chr17	35619812	298016	chr15:14515687-14515793	chr15	14233147	282540	chr11:895914-896017	chr11	1199790	303773
chr2:222519969-222520254	ENSG00000116106	222438922	81047	chr2:183408796-183409076	chr9	-	-	chr37:27891748-27892036	chr37	27809644	82104	chr6:10863870-10864154	chr6	10797060	66810	chr2:110499621-110499905	chr2	110407327	92294
chrX:130672720-130672859	ENSG00000171054	130677950	5091	chrX:137306049-137306206	chr1	-	-	chrX:102635835-102635974	chrX	102640011	4037	chrX:104601228-104601367	chrX	104605998	4631	chrX:15448957-15449091	chrX	15453981	4890
chr5:50823484-50823702	ENSG00000016082	50678921	144563	chr2:69804121-69804333	chr2	66884387	2919734	chr4:63507810-63508028	chr4	63648648	140620	chr21:20152746-20152964	chr21	20306385	153421	chr20:27569893-27570111	chr20	27755504	185393
chr8:84426232-84426391	ENSG00000184672	85095022	668631	chr4:223870951-223871110	chr2	-	-	chr29:30252340-30252499	chr29	30789954	537455	chr9:4824050-4824208	chr9	4281948	542102	chr14:81514556-81514714	chr14	80866151	648405
chr2:146009361-146009811	ENSG00000169554	145282147	727214	chr3:39261584-39262030	chr3	35196121	4065463	chr19:47254596-47255025	chr19	46550583	704013	chr18:28131697-28132146	chr18	27461817	669880	chr2:51444357-51444802	chr2	52274862	830060
chr7:115107451-115107532	ENSG00000135272	114562209	545242	chr4:44123490-44123571	chr4	41790494	2332996	chr14:54545223-54545305	chr14	54063568	481655	chr4:72726086-72726168	chr4	72206834	519252	chr4:53286356-53286438	chr4	53854749	568311
chr4:23717124-23717409	ENSG00000109606	24586173	868764	chr14:63355957-63356242	chr14	61248770	2107187	chr3:86347948-86348233	chr3	85549939	798009	chr3:100941149-100941434	chr3	100177256	763893	chr6:44761814-44762099	chr6	45683587	921488
chr2:52010106-52010468	ENSG00000179915	51259674	750432	chr1:165256506-165256866	chr6	-	-	chr10:53227691-53228283	chr10	52670843	556848	chr15:47914095-47914453	chr15	48567697	653244	chr11:33957466-33957824	chr11	33353304	604162
chrX:76224413-76224466	ENSG00000196468	76709648	485182	chrX:77139764-77139818	chrX	55910572	21229192	chrX:59442371-59442423	chrX	59739397	296974	chrX:57202099-57202154	chrX	57443444	241290	chrX:80267609-80267664	chrX	79954814	312795
chr1:42196309-42196487	ENSG00000127129	41950344	245965	chr5:146029563-146029739	chr5	142891220	3138343	chr15:1436306-1436483	chr15	1647965	211482	chr2:16574072-16574250	chr2	16793577	219327	chr3:105057647-105057825	chr3	105299334	241509
chr3:153384930-153384993	ENSG00000114790	153838792	453799	chr2:171647226-171647289	chr2	46226740	125420486	chr23:47891382-47891445	chr23	48290113	398668	chr16:85632156-85632218	chr16	85972751	340533	chr1:114933321-114933384	chr1	114432073	501248
chr8:27730158-27730301	ENSG00000168078	27695612	34546	chr15:52908744-52908887	chr15	49103281	3805463	chr25:29709838-29709982	chr25	29755848	45866	chr2:56476057-56476200	chr2	56418955	57102	chr8:10790978-10791134	chr8	10819982	28848
chr4:46947470-46947687	ENSG00000170516	46911252	36218	chr14:39016699-39016912	chr10	-	-	chr13:42913106-42913323	chr13	42740224	172882	chr3:81832313-81832530	chr3	81994410	161880	chr6:67167962-67168180	chr6	67118236	49726
chr3:62461310-62461654	ENSG00000153266	62359999	101311	chr15:19658599-19658957	chr15	16854938	2803661	chr20:28601248-28601592	chr20	28704683	103091	chr16:26594361-26594705	chr16	26692919	98214	chr22:38962968-38963312	chr22	39068358	105046
chr2:59395382-59395636	ENSG00000115392	58468507	926875	chr14:105754278-105754529	chr14	110369224	4614695	chr10:59442122-59442379	chr10	58632368	809754	chr15:41752402-41752657	chr15	42591277	838620	chr11:41738491-41738745	chr11	40744419	994072
chr1:81624621-81624683	ENSG00000117114	81771845	147162	chr2:273348354-273348415	chr2	277602151	4253736	chr6:66335575-66335637	chr6	66216074	119501	chr5:82204026-82204088	chr5	81707657	496369	chr3:63507404-63507465	chr3	63355165	152239
chr2:67954399-67954493	ENSG00000143971	67624451	329948	chr14:99748562-99748656	chr14	102047669	2299013	chr10:66916022-66916116	chr10	66631403	284619	chr15:34379395-34379489	chr15	34678370	298881	chr11:66168773-66168867	chr11	65813352	355421
chr18:53888880-53888992	ENSG00000091157	54318574	429582	chr18:63779727-63779838	chr18	58326472	5453255	chr1:19520661-19520773	chr1	19157893	362768	chr8:73764924-73765036	chr8	74126513	361477	chr24:56069651-56069763	chr24	56467339	397576
chr2:221130691-221130828	ENSG00000124006	220436581	694110	chr9:89650156-89650293	chr9	82469082	7181074	chr37:26668436-26668573	chr37	26079752	588684	chr6:9657855-9657992	chr6	9063215	594640	chr2:108942029-108942166	chr2	108226115	715914
chr18:58453761-58453909	ENSG00000166603	58040001	413760	chr13:28906718-28906863	chr18	-	-	chr1:15867108-15867255	chr1	16131567	264312	chr8:77458592-77458740	chr8	77171048	287544	chr24:59916876-59917024	chr24	59672094	244782
chr5:51680648-51681055	ENSG00000213949	52083730	402675	chr2:66210675-66211110	chr2	71763917	5552807	chr4:62788850-62789289	chr4	62455624	333226	chr21:19462490-19462922	chr21	19153982	308508	chr20:26696851-26697290	chr20	26293313	403538
chr9:7388266-7388507	ENSG00000178445	6645650	742616	chr5:95550036-95550278	chr1	-	-	chr11:28271692-28271938	chr11	27584474	687218	chr23:28458341-28458584	chr23	27814482	643859	chr8:37729068-37729311	chr8	38468512	739201
chr16:73402374-73402650	ENSG00000140836	73093597	308777	chr19:51566682-51566958	chr19	53739472	2172514	chr5:78958961-78959237	chr5	78610027	348934	chr3:20734883-20735159	chr3	21001311	266152	chr18:37971260-37971536	chr18	38186022	214486
chrX:130751056-130751120	ENSG00000171054	130677950	73106	chrX:137662599-137662661	chr1	-	-	chrX:102714229-102714293	chrX	102640011	74218	chrX:104673877-104673941	chrX	104605998	67879	chrX:15537793-15537857	chrX	15453981	83812
chr1:81463825-81464010	ENSG00000117114	81771845	307835	chr2:273558090-273558274	chr2	277602151	4043877	chr6:66482590-66482767	chr6	66216074	266516	chr5:82340878-82341064	chr5	81707657	633221	chr3:63677789-63677973	chr3	63355165	322624
chr2:145956444-145956642	ENSG00000169554	145282147	674297	chr3:39132498-39132696	chr3	35196121	3936377	chr19:47202425-47202623	chr19	46550583	651842	chr18:28086518-28086716	chr18	27461817	624701	chr2:51512639-51512838	chr2	52274862	762024
chr2:17275137-17275233	ENSG00000214842	17699706	424473	chr6:44385184-44385280	chr6	46895070	2509790	chr17:12624244-12624338	chr17	12998855	374517	chr15:77652149-77652245	chr15	77292419	359730	chr11:81583855-81583951	chr11	81239874	343981
chr2:220904686-220904748	ENSG00000124006	220436581	468105	chr9:89432385-89432447	chr9	82469082	6963303	chr37:26468700-26468764	chr37	26079752	388948	chr6:9452518-9452580	chr6	9063215	389303	chr2:108684967-108685029	chr2	108226115	458852
chr14:25301782-25301904	ENSG00000100453	25103473	198309	chr6:74693650-74693767	chr15	-	-	chr8:4662764-4662883	chr8	4511736	151028	chr1:163343798-163343919	chr1	162752547	591251	chr21:35441749-35441871	chr21	35267943	173806
chr16:51106223-51106390	ENSG00000103449	51185278	78888	chr19:30060486-30060657	chr19	34379537	4318880	chr2:64315933-64316100	chr2	64245467	70466	chr3:3920825-3920992	chr3	3978895	57903	chr18:19578402-19578570	chr18	19653740	75170
chr7:115133961-115134447	ENSG00000135272	114562209	571752	chr4:44154477-44154964	chr4	41790494	2363983	chr14:54574109-54574595	chr14	54063568	510541	chr4:72751619-72752104	chr4	72206834	544785	chr4:53259046-53259532	chr4	53854749	595217
chr5:51777585-51777971	ENSG00000213949	52083730	305759	chr2:66124725-66125112	chr2	71763917	5638805	chr4:62707353-62707735	chr4	62455624	251729	chr21:19386001-19386378	chr21	19153982	232019	chr20:26590393-26590769	chr20	26293313	297080
chrX:22667996-22668285	ENSG00000184735	23018087	349802	chrX:41729598-41729889	chr8	-	-	chrX:18434844-18435136	chrX	18776371	341235	chrX:17064064-17064356	chrX	17345722	281366	chrX:127756005-127756297	chrX	127364927	391078
chr4:143139911-143140094	ENSG00000164136	142557752	582159	chr19:40662210-40662391	chr19	34544021	6118189	chr19:1019512-1019691	chr19	1352457	332766	chr2:89559134-89559329	chr2	89935123	375794	chr17:15910277-15910457	chr17	16363886	453429
chr8:117630501-117630552	ENSG00000147679	117778742	148190	chr6:116775668-116775719	chr7	-	-	chr13:16074723-16074774	chr13	16213190	138416	chr9:60097437-60097488	chr9	60233194	135706	chr14:49858253-49858304	chr14	49714027	144226
chr16:51053569-51053681	ENSG00000103449	51185278	131597	chr19:30101026-30101134	chr19	34379537	4278403	chr2:64364075-64364185	chr2	64245467	118608	chr3:3876847-3876959	chr3	3978895	101936	chr18:19523609-19523721	chr18	19653740	130019
chr4:45193058-45193139	ENSG00000163281	44728612	464446	chr14:40582014-40582095	chr14	62736435	22154340	chr13:41575388-41575469	chr13	41228560	346828	chr3:83182946-83183026	chr3	83528289	345263	chr6:65416136-65416217	chr6	64992219	423917
chr3:184469123-184469279	ENSG00000177383	184429836	39287	chr11:86454503-86454665	chr1	-	-	chr34:17581348-17581504	chr34	17544950	36398	chr19:23064865-23065021	chr19	23030761	34104	chr1:83053881-83054037	chr1	83090389	36352
chr11:79688449-79688533	ENSG00000149256	79151992	536457	chr1:159530970-159531054	chr1	167398961	7867907	chr21:19004822-19004906	chr21	19502511	497605	chr7:64725146-64725230	chr7	65193196	467966	chr29:16084052-16084136	chr29	16642421	558285
chr12:65891692-65891866	ENSG00000174099	65672423	219269	chr7:65775989-65776161	chr7	62954845	2821144	chr10:8071707-8071880	chr10	7911920	159787	chr6:81127492-81127665	chr6	80995064	132428	chr5:48517843-48518017	chr5	48702835	184818
chr8:64246772-64247161	ENSG00000185728	64081112	165660	chr3:133552964-133553357	chr2	-	-	chr29:13391857-13392258	chr29	13240349	151508	chr9:21468151-21468541	chr9	21612894	144353	chr14:29940797-29941193	chr14	29830727	110070
chr2:112194152-112194376	ENSG00000153094	111876955	317197	chr3:129103910-129104133	chr3	126604489	2499421	chr17:35937622-35937844	chr17	35619812	317810	chr15:14535755-14535978	chr15	14233147	302608	chr11:872101-872338	chr11	1199790	327452
chr9:106603012-106603080	ENSG00000136824	106856541	253461	chr5:69819401-69819469	chr5	73151949	3332480	chr11:59896273-59896342	chr11	60091674	195332	chr25:9836013-9836081	chr25	10059214	223133	chr8:95096429-95096497	chr8	95362953	266456
chr2:221092021-221092906	ENSG00000124006	220436581	655440	chr9:89613795-89614656	chr9	82469082	7144713	chr37:26633236-26634123	chr37	26079752	553484	chr6:9621864-9622747	chr6	9063215	558649	chr2:108900465-108901350	chr2	108226115	674350
chr7:42432458-42432986	ENSG00000106571	42277469	154989	chr2:111921905-111922426	chr17	-	-	chr18:7679549-7680087	chr18	7800858	120771	chr4:13495419-13495946	chr4	13366275	129144	chr4:79320220-79320749	chr4	79444274	123525
chr2:221180388-221180484	ENSG00000124006	220436581	743807	chr9:89702805-89702899	chr9	82469082	7233723	chr37:26712346-26712440	chr37	26079752	632594	chr6:9706088-9706182	chr6	9063215	642873	chr2:109000607-109000701	chr2	108226115	774492
chr18:52902166-52902734	ENSG00000166510	52626739	275427	chr18:64686006-64686632	chr18	67564699	2878067	chr1:20410125-20410699	chr1	20641290	230591	chr8:72905168-72905729	chr8	72654605	250563	chr24:55063485-55064058	chr24	54786447	277038
chr18:52780270-52780367	ENSG00000166510	52626739	153531	chr18:64798235-64798329	chr18	67564699	2766370	chr1:20505023-20505120	chr1	20641290	136170	chr8:72803706-72803803	chr8	72654605	149101	chr24:54951249-54951346	chr24	54786447	164802
chr20:34772365-34772415	ENSG00000131043	34824381	51966	chr3:161722759-161722810	chr3	159067374	2655385	chr24:25003212-25003263	chr24	25053254	49991	chr22:26771933-26771984	chr22	26819176	47192	chr13:65967849-65967900	chr13	66018050	50150
chr2:221205836-221206005	ENSG00000124006	220436581	769255	chr9:89724761-89724922	chr9	82469082	7255679	chr37:26727300-26727470	chr37	26079752	647548	chr6:9722133-9722303	chr6	9063215	658918	chr2:109026935-109027098	chr2	108226115	800820
chr9:103477584-103477649	ENSG00000170681	103340361	137223	chr5:72904105-72904170	chr5	68926894	3977211	chr11:57543764-57543829	chr11	57453536	90228	chr25:7160811-7160876	chr25	7054711	106100	chr8:92056820-92056885	chr8	91916199	140621
chr1:235388570-235388879	ENSG00000188739	235324772	63798	chr17:51576486-51576792	chr6	-	-	chr4:4699360-4699674	chr4	4755827	56153	chr1:76106568-76106879	chr1	76162861	55982	chr28:8019464-8019768	chr28	7966128	53336
chr3:147990791-147991042	ENSG00000144891	148415571	424529	chr8:97300463-97300712	chr2	-	-	chr23:43240030-43240280	chr23	43613937	373657	chr16:81223168-81223419	chr16	81548815	325396	chr1:120879684-120879936	chr1	120445395	434289
chr2:24677523-24677616	ENSG00000084676	24714783	37167	chr15:111944648-111944744	chr6	-	-	chr17:18849597-18849691	chr17	18965935	116244	chr15:71375217-71375310	chr15	71245641	129576	chr11:74749037-74749130	chr11	74659432	89605
chr9:103992355-103992406	ENSG00000136881	104145801	153395	chr5:72399246-72399298	chr5	69268710	3130536	chr11:57998821-57998872	chr11	58109368	110496	chr25:7587109-7587160	chr25	7704932	117772	chr8:92585830-92585881	chr8	92724710	138829
chr2:220771666-220772036	ENSG00000124006	220436581	335085	chr9:89286652-89287024	chr9	82469082	6817570	chr37:26351392-26351763	chr37	26079752	271640	chr6:9331438-9331809	chr6	9063215	268223	chr2:108540548-108540921	chr2	108226115	314433
chr5:43900050-43900310	ENSG00000112992	43602794	297256	chr2:67647526-67647785	chr2	70640042	2992257	chr4:66191485-66191759	chr4	66437890	246131	chr21:22852165-22852424	chr21	23086192	233768	chr20:30964910-30965167	chr20	31258005	292838
chr5:102065663-102065893	ENSG00000145730	102089685	23792	chr9:104699772-104700000	chr9	110737325	6037325	chr3:8440390-8440617	chr3	8290489	149901	chr14:67497231-67497461	chr14	67474600	22631	chr7:104149808-104150038	chr7	104175550	25512
chr5:98668066-98668287	ENSG00000153922	98262240	405826	chr9:101374797-101375025	chr1	-	-	chr3:10950062-10950283	chr3	11288970	338687	chr14:70147935-70148156	chr14	70498333	350177	chr7:101035006-101035227	chr7	100565742	469264
chr3:184442698-184442805	ENSG00000177383	184429836	12862	chr11:86475403-86475505	chr1	-	-	chr34:17557308-17557416	chr34	17544950	12358	chr19:23043032-23043140	chr19	23030761	12271	chr1:83078402-83078510	chr1	83090389	11879
chr2:145849553-145850060	ENSG00000169554	145282147	567406	chr3:39017382-39017888	chr3	35196121	3821261	chr19:47090415-47090926	chr19	46550583	539832	chr18:27978372-27978883	chr18	27461817	516555	chr2:51643961-51644468	chr2	52274862	630394
chr8:97233685-97233743	ENSG00000156467	97247862	14119	chr5:27728627-27728686	chr7	-	-	chr29:40733667-40733725	chr29	40744534	10809	chr9:42623108-42623165	chr9	42635222	12057	chr14:70342888-70342945	chr14	70329413	13475
chr6:14639518-14639783	ENSG00000112149	14117872	521646	chr17:23093919-23094184	chr17	26364943	3270759	chr35:13956636-13956905	chr35	13489273	467363	chr20:14103425-14103690	chr20	13617586	485839	chr23:41901109-41901373	chr23	42354680	453307
chr2:221740041-221740589	ENSG00000116106	222438922	698333	chr9:90236115-90236660	chr9	83022498	7213617	chr37:27171272-27171819	chr37	27805314	633495	chr6:10172685-10173228	chr6	10795190	621962	chr2:109609059-109609604	chr2	110405363	795759
chr9:22730932-22731365	ENSG00000176399	22446840	284092	chr5:114421313-114421734	chr5	112243551	2177762	chr11:41787385-41787817	chr11	41566167	221218	chr23:41554142-41554573	chr23	41325540	228602	chr8:21495466-21495897	chr8	21768203	272306
chr18:53889960-53890118	ENSG00000091157	54318574	428456	chr18:63778716-63778873	chr18	58326472	5452244	chr1:19519512-19519670	chr1	19157893	361619	chr8:73766008-73766166	chr8	74126513	360347	chr24:56070717-56070877	chr24	56467339	396462
chr2:124122260-124122377	ENSG00000155052	124782864	660487	chr13:5569576-5569693	chr13	20631641	15061948	chr19:26970589-26970707	chr19	26397894	572695	chr18:7261677-7261794	chr18	6667430	594247	chr2:75654631-75654748	chr2	76308191	653443
chr2:161798050-161798160	ENSG00000136560	161993419	195259	chr13:86183259-86183369	chr3	-	-	chr36:6557487-6557597	chr36	6769333	211736	chr18:41523813-41523923	chr18	41680812	156889	chr2:35565344-35565454	chr2	35343041	222303
chr15:60087579-60087872	ENSG00000140299	59981733	105846	chr8:80478528-80478884	chr8	76675968	3802560	chr30:24633309-24633610	chr30	24546564	86745	chr1:131950285-131950586	chr1	132022504	71918	chr10:50516942-50517239	chr10	50628360	111121
chr1:81525922-81526142	ENSG00000117114	81771845	245703	chr2:273484975-273485197	chr2	277602151	4116954	chr6:66427319-66427540	chr6	66216074	211245	chr5:82285999-82286219	chr5	81707657	578342	chr3:63605202-63605420	chr3	63355165	250037
chr2:221059752-221060196	ENSG00000124006	220436581	623171	chr9:89573133-89573584	chr9	82469082	7104051	chr37:26602235-26602678	chr37	26079752	522483	chr6:9586290-9586738	chr6	9063215	523075	chr2:108853276-108853726	chr2	108226115	627161
chr5:51714372-51714617	ENSG00000213949	52083730	369113	chr2:66176717-66176962	chr2	71763917	5586955	chr4:62761521-62761765	chr4	62455624	305897	chr21:19436069-19436314	chr21	19153982	282087	chr20:26664985-26665232	chr20	26293313	371672
chr16:73676628-73676960	ENSG00000140836	73093597	583031	chr19:51097243-51097577	chr19	53739472	2641895	chr5:79202295-79202627	chr5	78610027	592268	chr3:20492290-20492622	chr3	21001311	508689	chr18:37722518-37722849	chr18	38186022	463173
chr14:25264744-25264811	ENSG00000100453	25103473	161271	chr6:74659015-74659080	chr15	-	-	chr8:4629625-4629691	chr8	4511736	117889	chr1:163304866-163304932	chr1	162752547	552319	chr21:35399158-35399224	chr21	35267943	131215
chrX:130554576-130554663	ENSG00000147255	130533677	20899	chr7:5411279-5411364	chrX	-	-	chrX:102559117-102559204	chrX	102376636	182481	chrX:104551765-104551852	chrX	104412220	139545	chrX:15385931-15386018	chrX	15202082	183849
chr2:59306065-59306393	ENSG00000115392	58468507	837558	chr14:105833815-105834141	chr14	110369224	4535083	chr10:59379969-59380297	chr10	58632368	747601	chr15:41814072-41814399	chr15	42591277	776878	chr11:41671628-41671954	chr11	40744419	927209
chr7:115024205-115024707	ENSG00000135272	114562209	461996	chr4:44022110-44022614	chr4	41790494	2231616	chr14:54472761-54473263	chr14	54063568	409193	chr4:72634666-72635168	chr4	72206834	427832	chr4:53372096-53372595	chr4	53854749	482154
chr5:102002019-102002394	ENSG00000145730	102089685	87291	chr9:104637536-104637900	chr9	110737325	6099425	chr3:8494453-8494829	chr3	8290489	203964	chr14:67543207-67543585	chr14	67474600	68607	chr7:104096831-104097208	chr7	104175550	78342
chr4:134236290-134236458	ENSG00000138650	134070470	165820	chr2:151007042-151007209	chr2	156481915	5474706	chr19:8593504-8593672	chr19	8732650	138978	chr2:96941514-96941680	chr2	97081807	140127	chr17:25324969-25325138	chr17	25495147	170009
chr12:99691492-99691658	ENSG00000180219	100041531	349873	chr7:31235523-31235700	chr13	-	-	chr15:38612114-38612286	chr15	38890120	277834	chr28:23641377-23641549	chr28	23899793	258244	chr5:63806177-63806349	chr5	64094901	288552
chr9:103487385-103487537	ENSG00000170681	103340361	147024	chr5:72899634-72899785	chr5	68926894	3972740	chr11:57550267-57550418	chr11	57453536	96731	chr25:7169587-7169738	chr25	7054711	114876	chr8:92067827-92067978	chr8	91916199	151628
chr15:46094562-46094887	ENSG00000137767	45923346	171216	chr3:125315930-125316256	chr3	121456387	3859543	chr30:12133520-12133844	chr30	11977400	156120	chr1:143738958-143739283	chr1	143866407	127124	chr10:64899609-64899933	chr10	65071130	171197
chr2:220766146-220766277	ENSG00000124006	220436581	329565	chr9:89279598-89279727	chr9	82469082	6810516	chr37:26346021-26346153	chr37	26079752	266269	chr6:9325947-9326078	chr6	9063215	262732	chr2:108534601-108534738	chr2	108226115	308486
chr2:221965468-221965556	ENSG00000116106	222438922	473366	chr9:90450709-90450801	chr9	83022498	7428211	chr37:27375790-27375882	chr37	27805314	429432	chr6:10370907-10370995	chr6	10795190	424195	chr2:109887638-109887726	chr2	110405363	517637
chr3:177555610-177555873	ENSG00000197584	177990720	434847	chr2:126385836-126386097	chr2	137954821	11568724	chr34:41208722-41208989	chr34	41963562	754573	chr19:17246595-17246862	chr19	17863925	617063	chr1:89812292-89812559	chr1	89080346	731946
chr1:166165990-166166152	ENSG00000188859	166136206	29784	chr13:89944886-89945050	chr13	101283804	11338754	chr38:17256465-17256627	chr38	17292326	35699	chr5:31490918-31491080	chr5	31607112	116032	chr3:2722397-2722559	chr3	2774510	51951
chr8:131860340-131860398	ENSG00000153317	131455906	404434	chr7:105353265-105353322	chr7	91990638	13362627	chr13:27770760-27770817	chr13	27430768	339992	chr9:71936406-71936463	chr9	71598463	337943	chr14:10995603-10995660	chr14	11327900	332240
chr3:153602914-153603002	ENSG00000114790	153838792	235790	chr2:171942658-171942749	chr2	46226740	125715918	chr23:48095099-48095190	chr23	48290113	194923	chr16:85801652-85801741	chr16	85972751	171010	chr1:114676671-114676762	chr1	114432073	244598
chr16:73353039-73354100	ENSG00000140836	73093597	259442	chr19:51521226-51522298	chr19	53739472	2217174	chr5:78910860-78911922	chr5	78610027	300833	chr3:20781120-20782182	chr3	21001311	219129	chr18:38016395-38017483	chr18	38186022	168539
chr2:67921817-67921947	ENSG00000143971	67624451	297366	chr14:99721476-99721613	chr14	102047669	2326056	chr10:66888979-66889105	chr10	66631403	257576	chr15:34413021-34413145	chr15	34678370	265225	chr11:66127208-66127338	chr11	65813352	313856
chr3:62499845-62500790	ENSG00000153266	62359999	139846	chr15:19621854-19622823	chr15	16854938	2766916	chr20:28565464-28566411	chr20	28704683	138272	chr16:26557662-26558593	chr16	26692919	134326	chr22:38926411-38927358	chr22	39068358	141000
chr2:220943306-220943440	ENSG00000124006	220436581	506725	chr9:89472409-89472559	chr9	82469082	7003327	chr37:26503772-26503905	chr37	26079752	424020	chr6:9487838-9487972	chr6	9063215	424623	chr2:108731724-108731858	chr2	108226115	505609
chr16:73384877-73385386	ENSG00000140836	73093597	291280	chr19:51550921-51551425	chr19	53739472	2188047	chr5:78942147-78942661	chr5	78610027	332120	chr3:20751600-20752110	chr3	21001311	249201	chr18:37985099-37985608	chr18	38186022	200414
chr6:14598491-14598548	ENSG00000112149	14117872	480619	chr17:23049089-23049146	chr17	26364943	3315797	chr35:13916914-13916971	chr35	13489273	427641	chr20:14061302-14061359	chr20	13617586	443716	chr23:41942402-41942458	chr23	42354680	412222
chr5:117705658-117705817	ENSG00000169570	118324240	618423	chr18:42857651-42857809	chr14	-	-	chr11:7885416-7885575	chr11	8346507	460932	chr14:54586216-54586375	chr14	54153274	432942	chr7:36714946-36715106	chr7	36230534	484412
chr9:76520105-76520299	ENSG00000198963	77112281	591982	chr1:244436079-244436267	chr1	241354363	3081716	chr1:84143939-84144133	chr1	83666066	477873	chr23:17109525-17109719	chr23	17582328	472609	chr8:50350556-50350750	chr8	50874906	524156
chr17:60207825-60208125	ENSG00000108510	60142643	65182	chr10:76363563-76363856	chr10	73685854	2677709	chr9:34575442-34575742	chr9	34641617	65875	chr11:34066714-34067014	chr11	34122135	55121	chr19:11220877-11221184	chr19	11288867	67683
chr4:98594733-98594812	ENSG00000138698	99182535	587723	chr9:71609370-71609450	chr2	-	-	chr32:20086412-20086492	chr32	20535517	449025	chr3:41384818-41384897	chr3	40927176	457642	chr6:28201538-28201616	chr6	27638279	563259
chr5:157949817-157950077	ENSG00000164330	158526769	576692	chr10:30164291-30164569	chr10	23523689	6640602	chr4:51914627-51914887	chr4	51378963	535664	chr14:20926175-20926435	chr14	20400279	525896	chr7:72213028-72213288	chr7	72804182	590894
chr16:16602124-16602429	ENSG00000091262	16317379	284745	chr1:193177871-193178174	chr1	103096453	90081418	chr6:27623942-27624257	chr6	27800215	175958	chr13:29463241-29463554	chr13	29615990	152436	chr25:14842096-14842413	chr25	14643302	198794
chr9:106464905-106464994	ENSG00000136824	106856541	391547	chr5:70011031-70011119	chr5	73151949	3140830	chr11:59780491-59780580	chr11	60091674	311094	chr25:9719391-9719480	chr25	10059214	339734	chr8:94943667-94943756	chr8	95362953	419197
chr2:46370913-46370969	ENSG00000116016	46520806	149837	chr6:9847094-9847153	chr6	20299176	10452023	chr10:48426408-48426465	chr10	48550882	124417	chr15:52745128-52745186	chr15	52622187	122941	chr11:28436108-28436166	chr11	28575995	139829
chr12:61801890-61801999	ENSG00000135655	62654119	852120	chr16:83556828-83556938	chr7	-	-	chr10:4766229-4766340	chr10	5510755	744415	chr6:78046500-78046610	chr6	78737308	690698	chr5:52449461-52449573	chr5	51510115	939346
chrX:23003030-23003271	ENSG00000184735	23018087	14816	chrX:42274065-42274308	chr8	-	-	chrX:18765329-18765573	chrX	18776371	10798	chrX:17339643-17339885	chrX	17345722	5837	chrX:127379263-127379507	chrX	127364927	14336
chr18:54100832-54100932	ENSG00000091157	54318574	217642	chr18:63588657-63588754	chr18	58326472	5262185	chr1:19337386-19337484	chr1	19157893	179493	chr8:73948531-73948631	chr8	74126513	177882	chr24:56267107-56267207	chr24	56467339	200132
chr3:148650851-148651012	ENSG00000163754	148709128	58116	chr18:2883101-2883258	chr2	-	-	chr23:43778238-43778397	chr23	43832336	53939	chr16:81744183-81744344	chr16	81798341	53997	chr1:120200838-120200999	chr1	120127893	72945
chr2:46314148-46314201	ENSG00000116016	46520806	206605	chr6:9791690-9791747	chr6	20299176	10507429	chr10:48378746-48378799	chr10	48550882	172083	chr15:52792219-52792272	chr15	52622187	170032	chr11:28385730-28385783	chr11	28575995	190212
chr4:134386843-134387191	ENSG00000138650	134070470	316373	chr2:150857843-150858195	chr2	156481915	5623720	chr19:8455703-8456055	chr19	8732650	276595	chr2:96816373-96816726	chr2	97081807	265081	chr17:25196050-25196403	chr17	25495147	298744
chr2:221136665-221136826	ENSG00000124006	220436581	700084	chr9:89655396-89655559	chr9	82469082	7186314	chr37:26674062-26674223	chr37	26079752	594310	chr6:9664018-9664187	chr6	9063215	600803	chr2:108947761-108947917	chr2	108226115	721646
chr8:36278765-36279019	ENSG00000215262	36641842	362823	chr16:67783324-67783575	chr16	70663273	2879698	chr16:28763114-28763366	chr16	28478384	284730	chr27:8986940-8987191	chr27	8699565	287375	chr27:31546434-31546689	chr27	31849126	302437
chr2:59240503-59240761	ENSG00000115392	58468507	771996	chr14:105894047-105894305	chr14	110369224	4474919	chr10:59320701-59320959	chr10	58632368	688333	chr15:41871996-41872254	chr15	42591277	719023	chr11:41595693-41595951	chr11	40744419	851274
chr18:52958595-52958901	ENSG00000166510	52626739	331856	chr18:64631088-64631397	chr18	67564699	2933302	chr1:20353249-20353561	chr1	20641290	287729	chr8:72960330-72960643	chr8	72654605	305725	chr24:55129927-55130243	chr24	54786447	343480
chr5:51009804-51009900	ENSG00000016082	50678921	330883	chr2:69611446-69611542	chr2	66884387	2727059	chr4:63335400-63335496	chr4	63648648	313152	chr21:19984334-19984430	chr21	20306385	321955	chr20:27360583-27360679	chr20	27755504	394825
chr2:221767147-221767227	ENSG00000116106	222438922	671695	chr9:90271980-90272059	chr9	83022498	7249482	chr37:27199169-27199249	chr37	27805314	606065	chr6:10197876-10197955	chr6	10795190	597235	chr2:109642144-109642223	chr2	110405363	763140
chr8:36308734-36308885	ENSG00000215262	36641842	332957	chr16:67819485-67819636	chr16	70663273	2843637	chr16:28743304-28743455	chr16	28478384	264920	chr27:8965309-8965460	chr27	8699565	265744	chr27:31567851-31568002	chr27	31849126	281124
chr14:54692930-54693130	ENSG00000100526	54863567	170437	chr15:24972619-24972823	chr15	27496685	2523862	chr8:30214599-30214803	chr8	30344957	130154	chr24:2600896-2601100	chr24	2726900	125800	chr10:67015686-67015888	chr10	67155090	139202
chr2:221954725-221954889	ENSG00000116106	222438922	484033	chr9:90439249-90439412	chr9	83022498	7416751	chr37:27365710-27365872	chr37	27805314	439442	chr6:10360838-10360999	chr6	10795190	434191	chr2:109874874-109875038	chr2	110405363	530325
chr2:59202274-59203193	ENSG00000115392	58468507	733767	chr14:105925565-105926546	chr14	110369224	4442678	chr10:59284039-59284962	chr10	58632368	651671	chr15:41908071-41908985	chr15	42591277	682292	chr11:41544713-41545644	chr11	40744419	800294
chr3:177096128-177096231	ENSG00000177565	176915261	180867	chr2:129092922-129093022	chr2	127025374	2067548	chr34:40858421-40858524	chr34	40612783	245638	chr19:16866670-16866772	chr19	16734808	131862	chr1:90282325-90282428	chr1	90428231	145803
chr16:51025121-51025298	ENSG00000103449	51185278	159980	chr19:30125270-30125447	chr19	34379537	4254090	chr2:64390321-64390497	chr2	64245467	144854	chr3:3853311-3853487	chr3	3978895	125408	chr18:19495797-19495973	chr18	19653740	157767
chr6:104868644-104868778	ENSG00000085382	105307794	439016	chr19:61994140-61994298	chr20	-	-	chr12:61934562-61934697	chr12	62329980	395283	chr10:54878448-54878583	chr10	55242806	364223	chr9:46199237-46199372	chr9	45744424	454813
chr13:103567147-103567270	ENSG00000134897	103451399	115748	chr16:89947425-89947547	chr9	-	-	chr22:52411249-52411371	chr22	52316530	94719	chr17:71470955-71471077	chr17	71360665	110290	chr12:83137682-83137804	chr12	83016461	121221
chr8:20359393-20359511	ENSG00000061337	20161474	197919	chr15:57779628-57779744	chr16	-	-	chr25:36571916-36572034	chr25	36804789	232755	chr2:49571525-49571643	chr2	49368485	203040	chr8:68168940-68169058	chr8	67867782	301158
chr2:59309794-59310007	ENSG00000115392	58468507	841287	chr14:105831101-105831314	chr14	110369224	4537910	chr10:59383840-59384053	chr10	58632368	751472	chr15:41810833-41811046	chr15	42591277	780231	chr11:41675899-41676121	chr11	40744419	931480
chr2:16030047-16030178	ENSG00000134323	16080686	50508	chr6:46963258-46963386	chr6	51353994	4390608	chr17:11682334-11682464	chr17	11718464	36000	chr15:78626906-78627037	chr15	78588928	37978	chr11:82534158-82534289	chr11	82695073	160784
chr7:114990446-114991008	ENSG00000135272	114562209	428237	chr4:43986752-43987306	chr4	41790494	2196258	chr14:54447364-54447923	chr14	54063568	383796	chr4:72611764-72612324	chr4	72206834	404930	chr4:53395536-53396096	chr4	53854749	458653
chr18:53932290-53932397	ENSG00000091157	54318574	386177	chr18:63744953-63745057	chr18	58326472	5418481	chr1:19488933-19489036	chr1	19157893	331040	chr8:73801611-73801715	chr8	74126513	324798	chr24:56106288-56106398	chr24	56467339	360941
chr18:30141574-30142159	ENSG00000141441	30050447	91127	chr18:12197099-12197687	chr18	14769099	2571412	chr7:57146417-57147003	chr7	57295067	148064	chr8:53329878-53330464	chr8	53246251	83627	chr24:24896047-24896635	chr24	25005192	108557
chrX:23179278-23179343	ENSG00000184735	23018087	161191	chrX:42568876-42568941	chr8	-	-	chrX:18931358-18931423	chrX	18776371	154987	chrX:17548410-17548475	chrX	17468947	79463	chrX:127092548-127092613	chrX	127364927	272314
chr3:62483497-62483720	ENSG00000153266	62359999	123498	chr15:19637892-19638114	chr15	16854938	2782954	chr20:28580732-28580960	chr20	28704683	123723	chr16:26573626-26573847	chr16	26692919	119072	chr22:38943327-38943551	chr22	39068358	124807
chr2:221794937-221795312	ENSG00000116106	222438922	643610	chr9:90292253-90292622	chr9	83022498	7269755	chr37:27220717-27221114	chr37	27805314	584200	chr6:10219067-10219439	chr6	10795190	575751	chr2:109672516-109672893	chr2	110405363	732470
chr9:76488630-76488815	ENSG00000198963	77112281	623466	chr1:244471659-244471847	chr1	241354363	3117296	chr1:84175150-84175341	chr1	83666066	509084	chr23:17080827-17081013	chr23	17582328	501315	chr8:50313294-50313478	chr8	50874906	561428
chr5:102746261-102746375	ENSG00000181751	102594403	151858	chr9:105108865-105108984	chr9	110878884	5769900	chr3:7845538-7845660	chr3	7967907	122247	chr14:66894752-66894867	chr14	67030817	135950	chr7:104856788-104856918	chr7	104692816	163972
chr11:79540107-79540164	ENSG00000149256	79151992	388115	chr1:159658588-159658644	chr1	167398961	7740317	chr21:19140213-19140269	chr21	19502511	362242	chr7:64854218-64854276	chr7	65193196	338920	chr29:16216665-16216722	chr29	16642421	425699
chr2:15976229-15976445	ENSG00000134323	16080686	104241	chr6:47004953-47005169	chr6	51353994	4348825	chr17:11649182-11649404	chr17	11718464	69060	chr15:78662112-78662335	chr15	78588928	73184	chr11:82600227-82600446	chr11	82695073	94627
chr2:161822331-161822544	ENSG00000136560	161993419	170875	chr13:86156960-86157174	chr3	-	-	chr36:6581924-6582138	chr36	6769333	187195	chr18:41543395-41543609	chr18	41680812	137203	chr2:35520212-35520425	chr2	35343041	177171
chr17:30067741-30067940	ENSG00000172301	30186356	118416	chr10:64461929-64462131	chr16	-	-	chr9:41192135-41192376	chr9	41102890	89245	chr11:40678994-40679195	chr11	40600927	78067	chr19:18704869-18705069	chr19	18604845	100024
chr4:142840911-142841011	ENSG00000164136	142557752	283159	chr19:40431103-40431200	chr19	34544021	5887082	chr19:1235390-1235490	chr19	1352457	116967	chr2:89788029-89788129	chr2	89935123	146994	chr17:16180312-16180412	chr17	16363886	183474
chr4:23720998-23721365	ENSG00000109606	24586173	864808	chr14:63351958-63352562	chr14	61248770	2103188	chr3:86344309-86344675	chr3	85549939	794370	chr3:100937499-100937866	chr3	100177256	760243	chr6:44765379-44765742	chr6	45683587	917845
chr7:115069502-115069882	ENSG00000135272	114562209	507293	chr4:44074206-44074589	chr4	41790494	2283712	chr14:54511049-54511430	chr14	54063568	447481	chr4:72672275-72672648	chr4	72206834	465441	chr4:53329268-53329646	chr4	53854749	525103
chr5:98754319-98754469	ENSG00000153922	98262240	492079	chr9:101466463-101466610	chr1	-	-	chr3:10874671-10874820	chr3	11288970	414150	chr14:70087168-70087318	chr14	70498333	411015	chr7:101147672-101147824	chr7	100565742	581930
chr18:52810356-52810613	ENSG00000166510	52626739	183617	chr18:64762815-64763069	chr18	67564699	2801630	chr1:20477128-20477385	chr1	20641290	163905	chr8:72832751-72833009	chr8	72654605	178146	chr24:54983305-54983562	chr24	54786447	196858
chr6:104861999-104862187	ENSG00000085382	105307794	445607	chr19:61987400-61987590	chr20	-	-	chr12:61927769-61927958	chr12	62329980	402022	chr10:54871704-54871893	chr10	55242806	370913	chr9:46213231-46213418	chr9	45744424	468807
chr2:138554132-138554523	ENSG00000150540	138721590	167067	chr13:52108730-52109121	chr3	-	-	chr19:40452196-40452589	chr19	40656232	203643	chr18:21359106-21359491	chr18	21516160	156669	chr2:59604650-59605046	chr2	59417441	187209
chr5:109697383-109697451	ENSG00000164209	110073837	376386	chr9:112465437-112465506	chr18	-	-	chr3:2011769-2011837	chr3	1719781	291988	chr14:61138428-61138496	chr14	60895084	243344	chr7:111971635-111971703	chr7	112332867	361164
chr1:81616791-81617055	ENSG00000117114	81771845	154790	chr2:273355723-273355987	chr2	277602151	4246164	chr6:66343088-66343352	chr6	66216074	127014	chr5:82210050-82210314	chr5	81707657	502393	chr3:63513884-63514147	chr3	63355165	158719
chr13:103563422-103563488	ENSG00000134897	103451399	112023	chr16:89951831-89951896	chr9	-	-	chr22:52407498-52407575	chr22	52316530	90968	chr17:71467203-71467267	chr17	71360665	106538	chr12:83132794-83132859	chr12	83016461	116333
chr1:81731402-81731722	ENSG00000117114	81771845	40123	chr2:273264892-273265212	chr2	277602151	4336939	chr6:66259452-66259769	chr6	66216074	43378	chr5:82125236-82125556	chr5	81707657	417579	chr3:63416958-63417280	chr3	63355165	61793
chr12:67356009-67356115	ENSG00000155974	67197966	158043	chr7:62481722-62481826	chr7	64890312	2408486	chr10:9349808-9349912	chr10	9063901	285907	chr6:82320069-82320175	chr6	82051586	268483	chr5:47057608-47057714	chr5	47393104	335390
chr2:221929644-221930104	ENSG00000116106	222438922	508818	chr9:90420650-90421108	chr9	83022498	7398152	chr37:27346674-27347134	chr37	27805314	458180	chr6:10342574-10343034	chr6	10795190	452156	chr2:109842684-109843147	chr2	110405363	562216
chr2:221745940-221746224	ENSG00000116106	222438922	692698	chr9:90243821-90244106	chr9	83022498	7221323	chr37:27176743-27177028	chr37	27805314	628286	chr6:10178112-10178397	chr6	10795190	616793	chr2:109614558-109614842	chr2	110405363	790521
chr8:84383038-84383449	ENSG00000184672	85095022	711573	chr4:223907298-223907699	chr2	-	-	chr29:30228959-30229373	chr29	30789954	560581	chr9:4849056-4849468	chr9	4281948	567108	chr14:81557456-81557869	chr14	80866151	691305
chr9:106690738-106690865	ENSG00000136824	106856541	165676	chr5:69725387-69725511	chr5	73151949	3426438	chr11:59959508-59959633	chr11	60091674	132041	chr25:9915446-9915571	chr25	10059214	143643	chr8:95186442-95186567	chr8	95362953	176386
chr16:73737157-73737275	ENSG00000140836	73093597	643560	chr19:51053538-51053655	chr19	53739472	2685817	chr5:79255903-79256022	chr5	78610027	645876	chr3:20441008-20441126	chr3	21001311	560185	chr18:37664787-37664905	chr18	38186022	521117
chr7:112206833-112207260	ENSG00000181016	112120908	85925	chr4:39661958-39662378	chr6	-	-	chr14:52162338-52162766	chr14	52085924	76414	chr4:70369036-70369459	chr4	70283380	85656	chr4:55796814-55797228	chr4	55864841	67613
chr5:117431307-117431461	ENSG00000169570	118324240	892779	chr18:43392517-43392672	chr14	-	-	chr11:7663038-7663192	chr11	8346507	683315	chr14:54806347-54806501	chr14	54153274	653073	chr7:36984335-36984488	chr7	36230534	753801
chr2:221151232-221151392	ENSG00000124006	220436581	714651	chr9:89669104-89669264	chr9	82469082	7200022	chr37:26684966-26685126	chr37	26079752	605214	chr6:9677450-9677607	chr6	9063215	614235	chr2:108968401-108968561	chr2	108226115	742286
chr1:81452057-81452188	ENSG00000117114	81771845	319657	chr2:273567472-273567601	chr2	277602151	4034550	chr6:66495505-66495632	chr6	66216074	279431	chr5:82353254-82353385	chr5	81707657	645597	chr3:63695552-63695684	chr3	63355165	340387
chr19:38319733-38319842	ENSG00000189144	38307940	11793	chr1:86070966-86071075	chr1	88739789	2668714	chr1:115043688-115043797	chr1	115141995	98198	chr10:9043846-9043955	chr10	8849572	194274	chr18:47931516-47931625	chr18	47762621	168895
chr3:153524819-153525009	ENSG00000114790	153838792	313783	chr2:171849624-171849811	chr2	46226740	125622884	chr23:48033490-48033685	chr23	48290113	256428	chr16:85749696-85749884	chr16	85972751	222867	chr1:114747158-114747345	chr1	114432073	315085
chr18:54176825-54177256	ENSG00000091157	54318574	141318	chr18:63510704-63511133	chr18	58326472	5184232	chr1:19267619-19268050	chr1	19157893	109726	chr8:74012864-74013296	chr8	74126513	113217	chr24:56345213-56345644	chr24	56467339	121695
chr8:36092312-36092511	ENSG00000215262	36641842	549331	chr16:67560446-67560636	chr16	70663273	3102637	chr16:28921282-28921481	chr16	28478384	442898	chr27:9141590-9141789	chr27	8699565	442025	chr27:31402053-31402251	chr27	31849126	446875
chr1:222213932-222214192	ENSG00000143507	221915518	298414	chr13:106836385-106836648	chr13	108932783	2096135	chr38:16475279-16475539	chr38	16233730	241549	chr30:11971152-11971413	chr30	11729570	241582	chr16:26294066-26294326	chr16	25936963	357103
chr5:52573577-52573667	ENSG00000164172	52405893	167684	chr2:65832640-65832730	chr2	71520173	5687443	chr4:62019946-62020037	chr4	62154814	134777	chr21:18775923-18776014	chr21	18877720	101706	chr20:25815431-25815522	chr20	25965174	149652
chrX:22863563-22863734	ENSG00000184735	23018087	154353	chrX:42035741-42035912	chr8	-	-	chrX:18605645-18605812	chrX	18776371	170559	chrX:17204507-17204672	chrX	17345722	141050	chrX:127564513-127564680	chrX	127364927	199586
chr14:74257088-74257317	ENSG00000156030	74256988	100	chr6:120031341-120031597	chr6	117877661	2153680	chr8:47049248-47049477	chr8	47017736	31512	chr24:19478024-19478253	chr24	19474337	3687	chr10:85591510-85591739	chr10	85588107	3403
chr3:147793545-147794035	ENSG00000144891	148415571	621536	chr8:97576015-97576505	chr2	-	-	chr23:43086077-43086567	chr23	43613937	527370	chr16:81054429-81054919	chr16	81548815	493896	chr1:121144008-121144497	chr1	120445395	698613
chr18:53878833-53878887	ENSG00000091157	54318574	439687	chr18:63796158-63796212	chr18	58326472	5469686	chr1:19530753-19530807	chr1	19157893	372860	chr8:73756276-73756330	chr8	74126513	370183	chr24:56062700-56062754	chr24	56467339	404585
chr4:141147970-141148034	ENSG00000153130	141178440	30406	chr2:161031313-161031379	chr19	-	-	chr19:2593942-2594017	chr19	2566489	27453	chr2:91221960-91222023	chr2	91194812	27148	chr17:17791520-17791588	chr17	17757670	33850
chrX:23079224-23079357	ENSG00000184735	23018087	61137	chrX:42400997-42401129	chr8	-	-	chrX:18829552-18829686	chrX	18776371	53181	chrX:17404674-17404806	chrX	17345727	58947	chrX:127215304-127215438	chrX	127364927	149489
chr9:103415247-103415459	ENSG00000170681	103340361	74886	chr5:72962372-72962584	chr5	68926894	4035478	chr11:57507152-57507364	chr11	57453536	53616	chr25:7119560-7119772	chr25	7054711	64849	chr8:92002788-92003000	chr8	91916199	86589
chr9:104732865-104733048	ENSG00000198785	104500862	232003	chr5:71836947-71837130	chr5	69564696	2272251	chr11:58641735-58641918	chr11	58422278	219457	chr25:8254347-8254530	chr25	8054706	199641	chr8:93461269-93461452	chr8	93146121	315148
chr2:220898364-220898493	ENSG00000124006	220436581	461783	chr9:89425905-89426034	chr9	82469082	6956823	chr37:26462425-26462553	chr37	26079752	382673	chr6:9446511-9446639	chr6	9063215	383296	chr2:108677381-108677510	chr2	108226115	451266
chr2:221124544-221124596	ENSG00000124006	220436581	687963	chr9:89642466-89642516	chr9	82469082	7173384	chr37:26661903-26661955	chr37	26079752	582151	chr6:9649342-9649393	chr6	9063215	586127	chr2:108932330-108932382	chr2	108226115	706215
chr3:110605468-110605580	ENSG00000177707	110788918	183338	chr11:60101303-60101418	chr11	62144557	2043139	chr33:15735944-15736056	chr33	15871172	135116	chr19:46495499-46495611	chr19	46336940	158559	chr1:56161386-56161498	chr1	56308185	146687
chr2:59815515-59815882	ENSG00000119866	60780702	964820	chr14:105356654-105357021	chr14	108548256	3191235	chr10:59815352-59815727	chr10	60689285	873558	chr15:41387643-41388007	chr15	40536640	851003	chr11:42192057-42192423	chr11	43174031	981608
chr11:79640895-79641114	ENSG00000149256	79151992	488903	chr1:159570941-159571163	chr1	167398961	7827798	chr21:19054622-19054839	chr21	19502511	447672	chr7:64768647-64768867	chr7	65193196	424329	chr29:16107374-16107594	chr29	16642421	534827
chr2:221146860-221147035	ENSG00000124006	220436581	710279	chr9:89667220-89667393	chr9	82469082	7198138	chr37:26682299-26682468	chr37	26079752	602547	chr6:9674328-9674497	chr6	9063215	611113	chr2:108964511-108964680	chr2	108226115	738396
chr4:141170211-141170491	ENSG00000153130	141178440	7949	chr2:161055542-161055830	chr19	-	-	chr19:2573930-2574216	chr19	2566489	7441	chr2:91202309-91202593	chr2	91194812	7497	chr17:17765570-17765855	chr17	17757670	7900
chr6:115644422-115644939	ENSG00000111816	116381921	736982	chr20:40887798-40888321	chr20	42996502	2108181	chr12:71147996-71148505	chr12	71756057	607552	chr10:64047955-64048467	chr10	64633193	584726	chr9:35701603-35702109	chr9	35040818	660785
chr5:50981345-50982001	ENSG00000016082	50678921	302424	chr2:69633983-69634639	chr2	66884387	2749596	chr4:63354880-63355535	chr4	63648648	293113	chr21:20006593-20007249	chr21	20306385	299136	chr20:27384544-27385201	chr20	27755504	370303
chr4:23720449-23720703	ENSG00000109606	24586173	865470	chr14:63352852-63353117	chr14	61248770	2104082	chr3:86344964-86345228	chr3	85549939	795025	chr3:100938147-100938411	chr3	100177256	760891	chr6:44764835-44765099	chr6	45683587	918488
chr8:117681324-117681608	ENSG00000147679	117778742	97134	chr6:116817788-116818081	chr7	-	-	chr13:16130914-16131213	chr13	16213190	81977	chr9:60147107-60147402	chr9	60233194	85792	chr14:49802492-49802795	chr14	49714027	88465
chr9:13878633-13879154	ENSG00000147862	14398982	519828	chr3:50105449-50105990	chr5	-	-	chr11:34366919-34367448	chr11	34674076	306628	chr23:34061392-34061918	chr23	34332092	270174	chr8:30421342-30421894	chr8	30010800	410542
chr3:64044364-64044428	ENSG00000163636	64009658	34706	chr4:189040469-189040534	chr15	-	-	chr20:27166053-27166117	chr20	27206629	40512	chr16:25211359-25211423	chr16	25253011	41588	chr22:37491815-37491879	chr22	37538013	46134
chr5:50910651-50910740	ENSG00000016082	50678921	231730	chr2:69701518-69701615	chr2	66884387	2817131	chr4:63421870-63421960	chr4	63648648	226688	chr21:20071499-20071591	chr21	20306385	234794	chr20:27468637-27468729	chr20	27755504	286775
chr18:52784882-52784960	ENSG00000166510	52626739	158143	chr18:64790602-64790685	chr18	67564699	2774014	chr1:20500340-20500418	chr1	20641290	140872	chr8:72808623-72808701	chr8	72654605	154018	chr24:54956159-54956237	chr24	54786447	169712
chr16:51056852-51057318	ENSG00000103449	51185278	127960	chr19:30097991-30098466	chr19	34379537	4281071	chr2:64359679-64360145	chr2	64245467	114212	chr3:3879903-3880369	chr3	3978895	98526	chr18:19527133-19527599	chr18	19653740	126141
chr12:67383309-67383384	ENSG00000155974	67197966	185343	chr7:62452027-62452102	chr7	64890312	2438210	chr10:9377617-9377692	chr10	9063901	313716	chr6:82346069-82346143	chr6	82051586	294483	chr5:47028243-47028318	chr5	47393104	364786
chr9:27365392-27365451	ENSG00000120160	27297137	68255	chr5:55046603-55046665	chr5	117826975	62780310	chr11:45494178-45494241	chr11	45431232	62946	chr23:45116719-45116781	chr23	45064606	52113	chr8:16910205-16910268	chr8	16979547	69279
chr3:184434178-184434372	ENSG00000177383	184429836	4342	chr11:86483797-86483989	chr1	-	-	chr34:17549075-17549273	chr34	17544950	4125	chr19:23034731-23034927	chr19	23030761	3970	chr1:83084658-83084851	chr1	83090389	5538
chr3:184434922-184435030	ENSG00000177383	184429836	5086	chr11:86483157-86483265	chr1	-	-	chr34:17549812-17549919	chr34	17544950	4862	chr19:23035463-23035571	chr19	23030761	4702	chr1:83083998-83084106	chr1	83090389	6283
chr16:73773969-73774183	ENSG00000140836	73093597	680372	chr19:51020137-51020351	chr19	53739472	2719121	chr5:79288581-79288794	chr5	78610027	678554	chr3:20411041-20411255	chr3	21001311	590056	chr18:37631693-37631910	chr18	38186022	554112
chr7:157679130-157679181	ENSG00000105993	157128075	551055	chr6:153810664-153810715	chr4	-	-	chr16:20138162-20138213	chr16	19806346	331816	chr4:108069256-108069309	chr4	107640852	428404	chr4:119752426-119752477	chr4	119431677	320749
chr2:140056380-140056435	ENSG00000144227	139537918	518462	chr3:29070910-29070965	chr3	68828	29002082	chr19:41860158-41860213	chr19	41318893	541265	chr18:22723395-22723450	chr18	22271482	451913	chr2:58013979-58014034	chr2	58582460	568426
chr4:116763112-116763303	ENSG00000138653	116035032	728080	chr2:166166073-166166261	chr2	248525746	82359485	chr32:35276931-35277122	chr32	34639636	637295	chr2:110952200-110952387	chr2	111555557	603170	chr6:10950156-10950347	chr6	11644932	694585
chr2:145897152-145897365	ENSG00000169554	145282147	615005	chr3:39079010-39079223	chr3	35196121	3882889	chr19:47145627-47145841	chr19	46550583	595044	chr18:28032516-28032731	chr18	27461817	570699	chr2:51583219-51583434	chr2	52274862	691428
chr4:143115118-143115182	ENSG00000164136	142557752	557366	chr19:40643714-40643777	chr19	34544021	6099693	chr19:1041838-1041902	chr19	1352457	310555	chr2:89581382-89581447	chr2	89935123	353676	chr17:15934070-15934134	chr17	16363886	429752
chr4:150342978-150343233	ENSG00000170390	150999426	656193	chr19:46655562-46655817	chr2	-	-	chr15:47539729-47539976	chr15	48119273	579297	chr2:83827749-83828005	chr2	83278289	549460	chr17:8438973-8439229	chr17	7742116	696857
chr3:62511953-62512371	ENSG00000153266	62359999	151954	chr15:19610894-19611317	chr15	16854938	2755956	chr20:28551645-28552066	chr20	28704683	152617	chr16:26544302-26544722	chr16	26692919	148197	chr22:38913807-38914228	chr22	39068358	154130
chr3:64053409-64053465	ENSG00000163636	64009658	43751	chr4:189035941-189035997	chr15	-	-	chr20:27155397-27155453	chr20	27206629	51176	chr16:25201554-25201610	chr16	25253011	51401	chr22:37477289-37477345	chr22	37538013	60668
chr4:130838941-130839500	ENSG00000151466	130014764	824177	chr2:153261357-153261910	chr2	148271696	4989661	chr19:11205469-11206032	chr19	12001306	795274	chr2:99476382-99476943	chr2	100183877	706934	chr17:28167579-28168140	chr17	29126352	958212
chr6:114421025-114421093	ENSG00000196591	114332472	88553	chr20:42238333-42238401	chr20	44827687	2589286	chr12:70177918-70177986	chr12	70072758	105160	chr10:63075651-63075719	chr10	62976771	98880	chr9:36807404-36807472	chr9	36918295	110823
chr9:76538806-76539028	ENSG00000198963	77112281	573253	chr1:244413903-244414152	chr1	241354363	3059540	chr1:84130663-84130883	chr1	83666066	464597	chr23:17124614-17124836	chr23	17582328	457492	chr8:50365990-50366212	chr8	50874906	508694
chr13:110107049-110107208	ENSG00000185950	110438915	331707	chr5:170421311-170421470	chr16	-	-	chr22:57953242-57953401	chr22	58227450	274049	chr17:76948214-76948373	chr17	77239776	291403	chr12:88458256-88458415	chr12	88669589	211174
chr16:73758805-73759229	ENSG00000140836	73093597	665208	chr19:51030765-51031192	chr19	53739472	2708280	chr5:79273761-79274182	chr5	78610027	663734	chr3:20423888-20424310	chr3	21001311	577001	chr18:37648206-37648625	chr18	38186022	537397
chr2:145823689-145824124	ENSG00000169554	145282147	541542	chr3:38993941-38994369	chr3	35196121	3797820	chr19:47066591-47067027	chr19	46550583	516008	chr18:27955206-27955641	chr18	27461817	493389	chr2:51673114-51673551	chr2	52274862	601311
chr3:147967717-147967919	ENSG00000144891	148415571	447652	chr8:97352503-97352704	chr2	-	-	chr23:43219223-43219425	chr23	43613937	394512	chr16:81197475-81197678	chr16	81548815	351137	chr1:120924032-120924232	chr1	120445395	478637
chr14:52141358-52141434	ENSG00000186469	52292913	151479	chr6:102753698-102753774	chr15	-	-	chr8:27936598-27936674	chr8	28080980	144306	chr1:185237469-185237545	chr1	185375753	138208	chr10:44549115-44549191	chr10	44711672	162481
chr7:114998772-114998908	ENSG00000135272	114562209	436563	chr4:44001094-44001230	chr4	41790494	2210600	chr14:54452984-54453126	chr14	54063568	389416	chr4:72617160-72617296	chr4	72206834	410326	chr4:53391890-53392026	chr4	53854749	462723
chr3:89975229-89975466	ENSG00000044524	89156674	818555	chr13:1604150-1604387	chr11	-	-	chr33:1406072-1406309	chr33	785725	620347	chr26:935585-935822	chr26	1656872	721050	chr1:37511337-37511573	chr1	36715182	796155
chr4:176464312-176464362	ENSG00000150625	176923815	459453	chr2:204120812-204120862	chr16	-	-	chr16:53876757-53876807	chr16	53834982	41775	chr27:32903865-32903915	chr27	32821165	82700	chr27:5401191-5401241	chr27	6314046	912805
chr1:81753878-81754304	ENSG00000117114	81771845	17541	chr2:273237109-273237529	chr2	277602151	4364622	chr6:66236102-66236527	chr6	66216074	20028	chr5:82102788-82103211	chr5	81707657	395131	chr3:63378266-63378684	chr3	63355165	23101
chr3:147801333-147802138	ENSG00000144891	148415571	613433	chr8:97568559-97569370	chr2	-	-	chr23:43093753-43094554	chr23	43613937	519383	chr16:81061999-81062808	chr16	81548815	486007	chr1:121136219-121137028	chr1	120445395	690824
chr17:14969738-14969789	ENSG00000125409	15244958	275169	chr10:46994736-46994786	chr10	49250931	2256145	chr5:38657456-38657507	chr5	38903381	245874	chr11:56966518-56966569	chr11	57200531	233962	chr19:33258297-33258349	chr19	33442907	184558
chr8:20695879-20696084	ENSG00000061337	20161474	534405	chr15:57348066-57348271	chr16	-	-	chr25:36271326-36271527	chr25	36804789	533262	chr2:49900635-49900840	chr2	49368485	532150	chr8:68566705-68566910	chr8	67867782	698923
chr6:14306734-14306843	ENSG00000112149	14117872	188862	chr17:22807206-22807315	chr17	26364943	3557628	chr35:13657031-13657140	chr35	13489273	167758	chr20:13782647-13782756	chr20	13617586	165061	chr23:42189387-42189496	chr23	42354680	165184
chr7:112236160-112236506	ENSG00000181016	112120908	115252	chr4:39689829-39690176	chr6	-	-	chr14:52184620-52184968	chr14	52085924	98696	chr4:70392793-70393138	chr4	70283380	109413	chr4:55768171-55768527	chr4	55864841	96314
chr4:143074971-143075207	ENSG00000164136	142557752	517219	chr19:40607428-40607664	chr19	34544021	6063407	chr19:1084913-1085148	chr19	1352457	267309	chr2:89622432-89622667	chr2	89935123	312456	chr17:15986520-15986755	chr17	16363886	377131
chr12:100164429-100164489	ENSG00000180219	100041531	122898	chr7:30835084-30835146	chr13	-	-	chr15:38984429-38984490	chr15	38890120	94309	chr28:24003379-24003439	chr28	23899793	103586	chr5:64203014-64203076	chr5	64094901	108113
chr18:53856497-53856748	ENSG00000091157	54318574	461826	chr18:63814422-63814677	chr18	58326472	5487950	chr1:19548622-19548873	chr1	19157893	390729	chr8:73735289-73735541	chr8	74126513	390972	chr24:56037189-56037442	chr24	56467339	429897
chr12:67258752-67258877	ENSG00000155974	67197966	60786	chr7:62578127-62578252	chr7	64890312	2312060	chr10:9246800-9246930	chr10	9063901	182899	chr6:82232971-82233096	chr6	82051586	181385	chr5:47165748-47165873	chr5	47393104	227231
chr15:46141773-46141914	ENSG00000137767	45923346	218427	chr3:125345172-125345312	chr3	121456387	3888785	chr30:12153977-12154117	chr30	11977400	176577	chr1:143711715-143711857	chr1	143866407	154550	chr10:64871225-64871365	chr10	65071130	199765
chr7:115134482-115134867	ENSG00000135272	114562209	572273	chr4:44154999-44155386	chr4	41790494	2364505	chr14:54574630-54575015	chr14	54063568	511062	chr4:72752139-72752524	chr4	72206834	545305	chr4:53258627-53259012	chr4	53854749	595737
chr2:221938082-221938487	ENSG00000116106	222438922	500435	chr9:90424977-90425383	chr9	83022498	7402479	chr37:27351776-27352182	chr37	27805314	453132	chr6:10346282-10346688	chr6	10795190	448502	chr2:109850740-109851146	chr2	110405363	554217
chr1:222065133-222065369	ENSG00000143507	221915518	149615	chr13:106929893-106930130	chr13	108932783	2002653	chr38:16376538-16376775	chr38	16233730	142808	chr30:11872036-11872273	chr30	11729570	142466	chr16:26145306-26145542	chr16	25936963	208343
chr11:79618351-79618407	ENSG00000149256	79151992	466359	chr1:159590962-159591018	chr1	167398961	7807943	chr21:19079486-19079542	chr21	19502511	422969	chr7:64793845-64793901	chr7	65193196	399295	chr29:16137862-16137918	chr29	16642421	504503
chrX:130758606-130758823	ENSG00000171054	130677950	80656	chrX:137678713-137678929	chr1	-	-	chrX:102727604-102727818	chrX	102640011	87593	chrX:104681566-104681779	chrX	104605998	75568	chrX:15546265-15546477	chrX	15453981	92284
chr2:220652866-220652932	ENSG00000124006	220436581	216285	chr9:89162443-89162507	chr9	82469082	6693361	chr37:26267871-26267938	chr37	26079752	188119	chr6:9242930-9242996	chr6	9063215	179715	chr2:108432578-108432644	chr2	108226115	206463
chr5:51630302-51630589	ENSG00000213949	52083730	453141	chr2:66256996-66257273	chr2	71763917	5506644	chr4:62841179-62841483	chr4	62455624	385555	chr21:19512657-19512944	chr21	19153982	358675	chr20:26762541-26762837	chr20	26293313	469228
chr7:115136239-115136541	ENSG00000135272	114562209	574030	chr4:44156698-44157002	chr4	41790494	2366204	chr14:54576350-54576658	chr14	54063568	512782	chr4:72753866-72754172	chr4	72206834	547032	chr4:53256990-53257297	chr4	53854749	597452
chr2:84268791-84268844	ENSG00000163541	84687169	418325	chr4:168767893-168767946	chr4	165937928	2829965	chr17:40693776-40693829	chr17	40393146	300630	chr15:20179602-20179654	chr15	19834367	345235	chr11:50900782-50900835	chr11	50400444	500338
chr3:177677424-177677558	ENSG00000197584	177990720	313162	chr2:126250236-126250370	chr2	137954821	11704451	chr34:41290041-41290181	chr34	41963562	673381	chr19:17344108-17344242	chr19	17863925	519683	chr1:89671972-89672106	chr1	89080346	591626
chr2:59371846-59372507	ENSG00000115392	58468507	903339	chr14:105777762-105778421	chr14	110369224	4590803	chr10:59421264-59421924	chr10	58632368	788896	chr15:41770961-41771621	chr15	42591277	819656	chr11:41716817-41717476	chr11	40744419	972398
chr6:14501411-14501908	ENSG00000112149	14117872	383539	chr17:22965531-22966033	chr17	26364943	3398910	chr35:13827865-13828365	chr35	13489273	338592	chr20:13962795-13963293	chr20	13617586	345209	chr23:42030747-42031243	chr23	42354680	323437
chr2:140252231-140252327	ENSG00000144227	139537918	714313	chr3:29489612-29489706	chr3	68828	29420784	chr19:42031795-42031889	chr19	41318893	712902	chr18:22897438-22897536	chr18	22271482	625956	chr2:57782852-57782946	chr2	58582460	799514
chr2:221373683-221373733	ENSG00000124006	220436581	937102	chr9:89876903-89876953	chr9	82469082	7407821	chr37:26867072-26867122	chr37	26079752	787320	chr6:9866541-9866591	chr6	9063215	803326	chr2:109204976-109205026	chr2	108226115	978861
chr6:114472903-114472984	ENSG00000196591	114332472	140431	chr20:42177786-42177866	chr20	44827687	2649821	chr12:70221266-70221347	chr12	70072758	148508	chr10:63124704-63124785	chr10	62976771	147933	chr9:36752788-36752869	chr9	36918295	165426
chr9:103416031-103416236	ENSG00000170681	103340361	75670	chr5:72961600-72961804	chr5	68926894	4034706	chr11:57507927-57508125	chr11	57453536	54391	chr25:7120352-7120557	chr25	7054711	65641	chr8:92003565-92003770	chr8	91916199	87366
chr2:221876016-221876103	ENSG00000116106	222438922	562819	chr9:90367088-90367175	chr9	83022498	7344590	chr37:27299670-27299757	chr37	27805314	505557	chr6:10300346-10300433	chr6	10795190	494757	chr2:109786649-109786732	chr2	110405363	618631
chr2:221989221-221989508	ENSG00000116106	222438922	449414	chr9:90471190-90471483	chr9	83022498	7448692	chr37:27395784-27396071	chr37	27805314	409243	chr6:10392655-10392942	chr6	10795190	402248	chr2:109909467-109909762	chr2	110405363	495601
chr5:50823730-50824061	ENSG00000016082	50678921	144809	chr2:69803760-69804093	chr2	66884387	2919373	chr4:63507450-63507783	chr4	63648648	140865	chr21:20152387-20152718	chr21	20306385	153667	chr20:27569534-27569865	chr20	27755504	185639
chr4:130826036-130826116	ENSG00000151466	130014764	811272	chr2:153252188-153252268	chr2	148271696	4980492	chr19:11219462-11219541	chr19	12001306	781765	chr2:99488577-99488657	chr2	100183877	695220	chr17:28186535-28186615	chr17	29126352	939737
chr3:177056584-177056687	ENSG00000177565	176915261	141323	chr2:129133347-129133450	chr2	127025374	2107973	chr34:40824133-40824235	chr34	40612783	211350	chr19:16833343-16833446	chr19	16734808	98535	chr1:90325837-90325940	chr1	90428231	102291
chr3:191677863-191678047	ENSG00000152492	191046866	630997	chr11:79399031-79399217	chr11	83920149	4520932	chr34:23699504-23699688	chr34	23167476	532028	chr19:29175279-29175464	chr19	28671724	503555	chr1:76030417-76030599	chr1	76624452	593853
chr17:14969930-14970069	ENSG00000125409	15244958	274889	chr10:46994918-46995057	chr10	49250931	2255874	chr5:38657633-38657771	chr5	38903381	245610	chr11:56966695-56966833	chr11	57200531	233698	chr19:33258475-33258614	chr19	33442907	184293
chr2:221105552-221105634	ENSG00000124006	220436581	668971	chr9:89624624-89624707	chr9	82469082	7155542	chr37:26643136-26643219	chr37	26079752	563384	chr6:9631727-9631810	chr6	9063215	568512	chr2:108917470-108917554	chr2	108226115	691355
chr18:54037484-54038042	ENSG00000091157	54318574	280532	chr18:63639518-63640071	chr18	58326472	5313046	chr1:19386221-19386775	chr1	19157893	228328	chr8:73902907-73903463	chr8	74126513	223050	chr24:56211439-56211993	chr24	56467339	255346
chr18:30109599-30109948	ENSG00000141441	30050447	59152	chr18:12169642-12169984	chr18	14769099	2599115	chr7:57176224-57176572	chr7	57295067	118495	chr8:53298708-53299048	chr8	53246251	52457	chr24:24938392-24938747	chr24	25005192	66445
chr11:123215788-123215932	ENSG00000166250	123065989	149799	chr8:61131171-61131314	chr8	46148331	14982840	chr5:11058478-11058622	chr5	11267028	208406	chr7:30484683-30484827	chr7	30349816	134867	chr15:34486367-34486511	chr15	34332333	154034
chr2:220968437-220968526	ENSG00000124006	220436581	531856	chr9:89497030-89497117	chr9	82469082	7027948	chr37:26526590-26526678	chr37	26079752	446838	chr6:9509825-9509913	chr6	9063215	446610	chr2:108755129-108755217	chr2	108226115	529014
chr8:36386660-36386798	ENSG00000215262	36641842	255044	chr16:67922453-67922591	chr16	70663273	2740682	chr16:28685290-28685427	chr16	28478384	206906	chr27:8908437-8908575	chr27	8699565	208872	chr27:31640606-31640744	chr27	31849126	208382
chr2:17359499-17359700	ENSG00000214842	17699706	340006	chr6:44301109-44301309	chr6	46895070	2593761	chr17:12704972-12705170	chr17	12998855	293685	chr15:77569640-77569838	chr15	77292419	277221	chr11:81495044-81495238	chr11	81239874	255170
chr3:62509405-62509678	ENSG00000153266	62359999	149406	chr15:19613430-19613703	chr15	16854938	2758492	chr20:28554306-28554577	chr20	28704683	150106	chr16:26547029-26547300	chr16	26692919	145619	chr22:38916464-38916735	chr22	39068358	151623
chr5:50982410-50982473	ENSG00000016082	50678921	303489	chr2:69633508-69633574	chr2	66884387	2749121	chr4:63354405-63354468	chr4	63648648	294180	chr21:20006115-20006178	chr21	20306385	300207	chr20:27384067-27384129	chr20	27755504	371375
chr2:221081481-221081570	ENSG00000124006	220436581	644900	chr9:89597985-89598074	chr9	82469082	7128903	chr37:26621912-26622001	chr37	26079752	542160	chr6:9608108-9608195	chr6	9063215	544893	chr2:108882926-108883015	chr2	108226115	656811
chr12:31163935-31164039	ENSG00000013573	31226779	62740	chr4:231065275-231065377	chr9	-	-	chr27:41548445-41548550	chr27	42072469	523919	chr6:31166835-31166939	chr6	30642352	524483	chr5:107066292-107066402	chr5	107471737	405335
chr20:34797120-34797189	ENSG00000131043	34824381	27192	chr3:161745791-161745859	chr3	159067374	2678417	chr24:25026906-25026975	chr24	25053254	26279	chr22:26794917-26794986	chr22	26819176	24190	chr13:65992872-65992941	chr13	66018050	25109
chr9:7391458-7391696	ENSG00000178445	6645650	745808	chr5:95560153-95560393	chr1	-	-	chr11:28274915-28275153	chr11	27584474	690441	chr23:28461642-28461882	chr23	27814482	647160	chr8:37725777-37726016	chr8	38468512	742496
chr2:161747877-161748227	ENSG00000136560	161993419	245192	chr13:86239220-86239566	chr3	-	-	chr36:6501238-6501591	chr36	6769333	267742	chr18:41468547-41468899	chr18	41680812	211913	chr2:35632232-35632583	chr2	35343041	289191
chr1:81742026-81742237	ENSG00000117114	81771845	29608	chr2:273253569-273253781	chr2	277602151	4348370	chr6:66248956-66249171	chr6	66216074	32882	chr5:82114887-82115098	chr5	81707657	407230	chr3:63401423-63401912	chr3	63355165	46258
chr2:161799658-161799998	ENSG00000136560	161993419	193421	chr13:86181561-86181899	chr3	-	-	chr36:6559252-6559591	chr36	6769333	209742	chr18:41525378-41525718	chr18	41680812	155094	chr2:35563378-35563713	chr2	35343041	220337
chr20:34796631-34796744	ENSG00000131043	34824381	27637	chr3:161745334-161745448	chr3	159067374	2677960	chr24:25026434-25026548	chr24	25053254	26706	chr22:26794446-26794560	chr22	26819176	24616	chr13:65992425-65992540	chr13	66018050	25510
chr15:46024730-46024957	ENSG00000137767	45923346	101384	chr3:125221420-125221653	chr3	121456387	3765033	chr30:12061531-12061763	chr30	11977400	84131	chr1:143809111-143809344	chr1	143866407	57063	chr10:64980559-64980791	chr10	65071130	90339
chr7:107933503-107933985	ENSG00000091128	107770801	162702	chr6:74049074-74049544	chr6	58706265	15342809	chr18:12355638-12356119	chr18	12517121	161002	chr4:8187549-8188031	chr4	8035156	152393	chr4:49666187-49666662	chr4	49479289	186898
chr5:52571746-52571820	ENSG00000164172	52405893	165853	chr2:65835551-65835622	chr2	71520173	5684551	chr4:62020970-62021045	chr4	62154814	133769	chr21:18778336-18778408	chr21	18877720	99312	chr20:25818697-25818772	chr20	25965174	146402
chr2:59291898-59292317	ENSG00000115392	58468507	823391	chr14:105844636-105845083	chr14	110369224	4524141	chr10:59368047-59368463	chr10	58632368	735679	chr15:41825057-41825473	chr15	42591277	765804	chr11:41659689-41660105	chr11	40744419	915270
chr4:143131112-143131374	ENSG00000164136	142557752	573360	chr19:40654925-40655191	chr19	34544021	6110904	chr19:1026704-1026964	chr19	1352457	325493	chr2:89567244-89567505	chr2	89935123	367618	chr17:15920059-15920320	chr17	16363886	443566
chr3:62487009-62487301	ENSG00000153266	62359999	127010	chr15:19635010-19635299	chr15	16854938	2780072	chr20:28577401-28577694	chr20	28704683	126989	chr16:26570338-26570628	chr16	26692919	122291	chr22:38939505-38939797	chr22	39068358	128561
chr5:157959601-157959679	ENSG00000164330	158526769	567090	chr10:30156025-30156103	chr10	23523689	6632336	chr4:51906258-51906336	chr4	51378963	527295	chr14:20918391-20918469	chr14	20400279	518112	chr7:72221529-72221608	chr7	72804182	582574
chr16:14095119-14095173	ENSG00000186260	14165178	70005	chr10:11737751-11737806	chr14	-	-	chr6:29165430-29165485	chr6	29098228	67202	chr13:30969620-30969675	chr13	30911132	58488	chr25:13001196-13001251	chr25	13072436	71185
chr18:52928864-52928986	ENSG00000166510	52626739	302125	chr18:64660496-64660626	chr18	67564699	2904073	chr1:20383122-20383245	chr1	20641290	258045	chr8:72930848-72930971	chr8	72654605	276243	chr24:55091645-55091773	chr24	54786447	305198
chr5:117660829-117661095	ENSG00000169570	118324240	663145	chr18:42814893-42815157	chr14	-	-	chr11:7855065-7855329	chr11	8346507	491178	chr14:54625345-54625609	chr14	54153274	472071	chr7:36762787-36763051	chr7	36230534	532253
chr16:73540506-73540825	ENSG00000140836	73093597	446909	chr19:51218594-51218911	chr19	53739472	2520561	chr5:79078972-79079324	chr5	78610027	468945	chr3:20614372-20614691	chr3	21001311	386620	chr18:37849332-37849651	chr18	38186022	336371
chr2:15958375-15958840	ENSG00000134323	16080686	121846	chr6:47019436-47019898	chr6	51353994	4334096	chr17:11633110-11633575	chr17	11718464	84889	chr15:78676744-78677210	chr15	78588928	87816	chr11:82614910-82615372	chr11	82695073	79701
chr16:50982311-50982741	ENSG00000103449	51185278	202537	chr19:30159719-30160141	chr19	34379537	4219396	chr2:64422674-64423104	chr2	64245467	177207	chr3:3813662-3814092	chr3	3978895	164803	chr18:19456256-19456685	chr18	19653740	197055
chr3:90144770-90144822	ENSG00000044524	89156674	988096	chr13:1412877-1412930	chr11	-	-	chr33:1539979-1540032	chr33	785725	754254	chr26:800470-800523	chr26	1656872	856349	chr1:37688830-37688883	chr1	36715182	973648
chr1:81632821-81633043	ENSG00000117114	81771845	138802	chr2:273345228-273345453	chr2	277602151	4256698	chr6:66332850-66333075	chr6	66216074	116776	chr5:82201474-82201699	chr5	81707657	493817	chr3:63504816-63505041	chr3	63355165	149651
chr3:184368683-184368740	ENSG00000177383	184429836	61096	chr11:86538965-86539022	chr1	-	-	chr34:17498339-17498396	chr34	17544950	46554	chr19:22985220-22985277	chr19	23030761	45484	chr1:83139123-83139180	chr1	83090425	48698
chr8:36538682-36538833	ENSG00000215262	36641842	103009	chr16:68086714-68086863	chr16	70663273	2576410	chr16:28558195-28558345	chr16	28478384	79811	chr27:8784279-8784429	chr27	8699565	84714	chr27:31775331-31775482	chr27	31849126	73644
chr2:145837738-145837826	ENSG00000169554	145282147	555591	chr3:39004764-39004852	chr3	35196121	3808643	chr19:47081336-47081423	chr19	46550583	530753	chr18:27969586-27969675	chr18	27461817	507769	chr2:51656345-51656433	chr2	52274862	618429
chr2:221745616-221745737	ENSG00000116106	222438922	693185	chr9:90243502-90243623	chr9	83022498	7221004	chr37:27176410-27176531	chr37	27805314	628783	chr6:10177782-10177903	chr6	10795190	617287	chr2:109614225-109614346	chr2	110405363	791017
chr2:221879673-221879932	ENSG00000116106	222438922	558990	chr9:90372470-90372731	chr9	83022498	7349972	chr37:27304528-27304780	chr37	27805314	500534	chr6:10303558-10303812	chr6	10795190	491378	chr2:109790014-109790266	chr2	110405363	615097
chr2:220777300-220777402	ENSG00000124006	220436581	340719	chr9:89292349-89292451	chr9	82469082	6823267	chr37:26357240-26357342	chr37	26079752	277488	chr6:9337152-9337254	chr6	9063215	273937	chr2:108548887-108548989	chr2	108226115	322772
chr5:51787307-51787594	ENSG00000213949	52083730	296136	chr2:66112413-66112701	chr2	71763917	5651216	chr4:62694699-62694985	chr4	62455624	239075	chr21:19372877-19373164	chr21	19153982	218895	chr20:26569701-26569988	chr20	26293313	276388
chr3:110428409-110428559	ENSG00000177707	110788918	360359	chr11:59920959-59921107	chr11	62144557	2223450	chr33:15591539-15591687	chr33	15871172	279485	chr19:46645590-46645740	chr19	46336940	308650	chr1:55967571-55967730	chr1	56308185	340455
chr2:145957847-145958258	ENSG00000169554	145282147	675700	chr3:39134291-39134702	chr3	35196121	3938170	chr19:47203870-47204281	chr19	46550583	653287	chr18:28087926-28088336	chr18	27461817	626109	chr2:51509104-51509514	chr2	52274862	765348
chr5:118104073-118104169	ENSG00000169570	118324240	220071	chr18:43245244-43245342	chr14	-	-	chr11:8210973-8211069	chr11	8346507	135438	chr14:54293266-54293362	chr14	54153274	139992	chr7:36333107-36333203	chr7	36230534	102573
chr2:140122934-140123050	ENSG00000144227	139537918	585016	chr3:29237636-29237750	chr3	68828	29168808	chr19:41918734-41918850	chr19	41318893	599841	chr18:22781248-22781364	chr18	22271482	509766	chr2:57946607-57946723	chr2	58582460	635737
chr6:115671632-115671979	ENSG00000111816	116381921	709942	chr20:40844765-40845114	chr20	42996502	2151388	chr12:71172860-71173207	chr12	71756057	582850	chr10:64081558-64081905	chr10	64633193	551288	chr9:35677921-35678268	chr9	35040818	637103
chr4:150434605-150434974	ENSG00000170390	150999426	564452	chr19:46748310-46748675	chr2	-	-	chr15:47620971-47621337	chr15	48119273	497936	chr2:83751493-83751862	chr2	83278289	473204	chr17:8327243-8327612	chr17	7742116	585127
chr2:59857898-59858296	ENSG00000119866	60780702	922406	chr14:105307747-105308142	chr14	108548256	3240114	chr10:59846983-59847387	chr10	60689285	841898	chr15:41354638-41355037	chr15	40536640	817998	chr11:42234041-42234441	chr11	43174031	939590
chr2:145978014-145978791	ENSG00000169554	145282147	695867	chr3:39146258-39147038	chr3	35196121	3950137	chr19:47216601-47217379	chr19	46550583	666018	chr18:28100978-28101758	chr18	27461817	639161	chr2:51490773-51491552	chr2	52274862	783310
chr6:159886025-159886096	ENSG00000146457	160146617	260521	chr1:49129288-49129357	chr1	51806426	2677069	chr1:48777273-48777344	chr1	48976039	198695	chr31:1873743-1873814	chr31	2079195	205381	chr9:97236439-97236510	chr9	97433768	197258
chr18:54089371-54089701	ENSG00000091157	54318574	228873	chr18:63595858-63596181	chr18	58326472	5269386	chr1:19343341-19343672	chr1	19157893	185448	chr8:73942831-73943159	chr8	74126513	183354	chr24:56259731-56260061	chr24	56467339	207278
chr3:90105686-90105849	ENSG00000044524	89156674	949012	chr13:1474601-1474774	chr11	-	-	chr33:1491191-1491349	chr33	785725	705466	chr26:838900-839061	chr26	1656872	817811	chr1:37635884-37636043	chr1	36715182	920702
chr2:59797448-59797775	ENSG00000119866	60780702	982927	chr14:105374089-105374418	chr14	108548256	3173838	chr10:59801107-59801432	chr10	60689285	887853	chr15:41403630-41403959	chr15	40536640	866990	chr11:42175630-42175958	chr11	43174031	998073
chr3:16404932-16405003	ENSG00000154814	16306706	98226	chr9:11831548-11831619	chr16	-	-	chr23:26427782-26427853	chr23	26516070	88217	chr16:65229345-65229416	chr16	65326619	97203	chr1:155098428-155098498	chr1	155020422	78006
chr16:51046283-51046529	ENSG00000103449	51185278	138749	chr19:30106531-30106777	chr19	34379537	4272760	chr2:64370531-64370781	chr2	64245467	125064	chr3:3871497-3871744	chr3	3978895	107151	chr18:19517241-19517493	chr18	19653740	136247
chr1:81731048-81731246	ENSG00000117114	81771845	40599	chr2:273265368-273265563	chr2	277602151	4336588	chr6:66259925-66260123	chr6	66216074	43851	chr5:82125711-82125909	chr5	81707657	418054	chr3:63417442-63417639	chr3	63355165	62277
chr9:7566624-7566675	ENSG00000178445	6645650	920974	chr5:95858373-95858423	chr1	-	-	chr11:28430683-28430734	chr11	27584474	846209	chr23:28606944-28606995	chr23	27814482	792462	chr8:37505901-37505950	chr8	38468512	962562
chr2:138446370-138446430	ENSG00000150540	138721590	275160	chr13:52007162-52007222	chr3	-	-	chr19:40357246-40357306	chr19	40656232	298926	chr18:21274522-21274582	chr18	21516160	241578	chr2:59730000-59730061	chr2	59417441	312559
chr18:53988658-53988724	ENSG00000091157	54318574	329850	chr18:63689738-63689803	chr18	58326472	5363266	chr1:19428360-19428426	chr1	19157893	270467	chr8:73859029-73859095	chr8	74126513	267418	chr24:56169611-56169676	chr24	56467339	297663
chr5:109734885-109734960	ENSG00000164209	110073837	338877	chr9:112508212-112508286	chr18	-	-	chr3:1975496-1975569	chr3	1719781	255715	chr14:61107118-61107193	chr14	60895084	212034	chr7:112022530-112022604	chr7	112332867	310263
chr2:220861011-220861096	ENSG00000124006	220436581	424430	chr9:89373454-89373539	chr9	82469082	6904372	chr37:26425271-26425356	chr37	26079752	345519	chr6:9412797-9412882	chr6	9063215	349582	chr2:108634942-108635027	chr2	108226115	408827
chr18:52910565-52910811	ENSG00000166510	52626739	283826	chr18:64677732-64677973	chr18	67564699	2886726	chr1:20402077-20402326	chr1	20641290	238964	chr8:72913099-72913345	chr8	72654605	258494	chr24:55072339-55072587	chr24	54786447	285892
chr16:50977508-50977830	ENSG00000103449	51185278	207448	chr19:30165226-30165546	chr19	34379537	4213991	chr2:64428532-64428854	chr2	64245467	183065	chr3:3808309-3808631	chr3	3978895	170264	chr18:19450025-19450347	chr18	19653740	203393
chr2:220891395-220891902	ENSG00000124006	220436581	454814	chr9:89417354-89417862	chr9	82469082	6948272	chr37:26458798-26459309	chr37	26079752	379046	chr6:9441559-9442071	chr6	9063215	378344	chr2:108670894-108671407	chr2	108226115	444779
chr4:23735761-23736501	ENSG00000109606	24586173	849672	chr14:63343455-63344204	chr14	61248770	2094685	chr3:86333932-86334678	chr3	85549939	783993	chr3:100927947-100928694	chr3	100177256	750691	chr6:44776614-44777364	chr6	45683587	906223
chr2:59877870-59877934	ENSG00000119866	60780702	902768	chr14:105295122-105295185	chr14	108548256	3253071	chr10:59859975-59860039	chr10	60689285	829246	chr15:41340322-41340386	chr15	40536640	803682	chr11:42255834-42255898	chr11	43174031	918133
chr2:145952852-145952977	ENSG00000169554	145282147	670705	chr3:39129828-39129953	chr3	35196121	3933707	chr19:47198739-47198864	chr19	46550583	648156	chr18:28082804-28082929	chr18	27461817	620987	chr2:51517152-51517274	chr2	52274862	757588
chr8:20430774-20431056	ENSG00000061337	20161474	269300	chr15:57711269-57711550	chr16	-	-	chr25:36505074-36505352	chr25	36804789	299437	chr2:49636809-49637091	chr2	49368485	268324	chr8:68248623-68248904	chr8	67867782	380841
chr16:73393640-73393866	ENSG00000140836	73093597	300043	chr19:51559425-51559642	chr19	53739472	2179830	chr5:78950530-78950755	chr5	78610027	340503	chr3:20743540-20743765	chr3	21001311	257546	chr18:37978356-37978577	chr18	38186022	207445
chr14:54687049-54687319	ENSG00000100526	54863567	176248	chr15:24963603-24963869	chr15	27496685	2532816	chr8:30208535-30208805	chr8	30344957	136152	chr24:2594801-2595072	chr24	2726900	131828	chr10:67009785-67010057	chr10	67155090	145033
chr8:132025841-132026037	ENSG00000153317	131455906	569935	chr7:105516104-105516656	chr7	91990638	13525466	chr13:27905890-27906086	chr13	27430768	475122	chr9:72078599-72078794	chr9	71598463	480136	chr14:10849408-10849602	chr14	11327900	478298
chr2:215475595-215475687	ENSG00000138376	215674428	198741	chr9:75501056-75501149	chr9	78145955	2644806	chr37:21876644-21876736	chr37	21966909	90173	chr6:4892821-4892914	chr6	4994309	101395	chr2:103172173-103172265	chr2	103370905	198640
chr5:117494316-117494724	ENSG00000169570	118324240	829516	chr18:43475479-43475896	chr14	-	-	chr11:7718093-7718502	chr11	8346507	628005	chr14:54749452-54749863	chr14	54153274	596178	chr7:36920606-36921016	chr7	36230534	690072
chr9:107143066-107143263	ENSG00000186881	107266455	123192	chr5:73461800-73462006	chr5	69134585	4327215	chr11:60370384-60370581	chr11	60467149	96568	chr25:10325140-10325338	chr25	10431380	106042	chr8:95647653-95647846	chr8	95761536	113690
chr2:220988456-220988532	ENSG00000124006	220436581	551875	chr9:89516020-89516096	chr9	82469082	7046938	chr37:26543212-26543285	chr37	26079752	463460	chr6:9529227-9529303	chr6	9063215	466012	chr2:108777267-108777344	chr2	108226115	551152
chr17:60213464-60213656	ENSG00000108510	60142643	70821	chr10:76357037-76357237	chr10	73685854	2671183	chr9:34571377-34571567	chr9	34641617	70050	chr11:34063277-34063468	chr11	34122135	58667	chr19:11216548-11216738	chr19	11288867	72129
chr7:36547576-36547719	ENSG00000164542	36429734	117842	chr17:57622758-57622902	chr8	-	-	chr14:47888614-47888757	chr14	47805350	83264	chr4:65973998-65974143	chr4	65866264	107734	chr4:61130377-61130521	chr4	61258800	128279
chr2:78402842-78402927	ENSG00000176204	77820445	582397	chr4:178819866-178819950	chr4	175391882	3427984	chr17:45626555-45626640	chr17	46091137	464497	chr15:25435575-25435659	chr15	25944957	509298	chr11:57788299-57788383	chr11	58431067	642684
chr2:220922234-220922336	ENSG00000124006	220436581	485653	chr6:67716896-67716996	chr9	-	-	chr37:26484789-26484891	chr37	26079752	405037	chr6:9468901-9469003	chr6	9063215	405686	chr2:108706359-108706461	chr2	108226115	480244
chr12:99612054-99612195	ENSG00000180219	100041531	429336	chr7:31308441-31308582	chr13	-	-	chr15:38550735-38550876	chr15	38890120	339244	chr28:23558565-23558706	chr28	23899793	341087	chr5:63730788-63730924	chr5	64094901	363977
chr13:76812741-76812797	ENSG00000136153	76194570	618171	chr15:90196223-90196279	chr15	87900117	2296106	chr22:29954824-29954880	chr22	29519369	435455	chr17:49211344-49211400	chr17	48815013	396331	chr12:51589358-51589414	chr12	51141637	447721
chr2:78521255-78521610	ENSG00000176204	77820445	700810	chr4:178906654-178907004	chr4	175391882	3514772	chr17:45536444-45536800	chr17	46091137	554337	chr15:25329226-25329581	chr15	25944957	615376	chr11:57698043-57698399	chr11	58431067	732668
chr18:52807010-52807398	ENSG00000166510	52626739	180271	chr18:64766221-64766678	chr18	67564699	2798021	chr1:20480179-20480566	chr1	20641290	160724	chr8:72829575-72829967	chr8	72654605	174970	chr24:54980133-54980524	chr24	54786447	193686
chr14:25263906-25264164	ENSG00000100453	25103473	160433	chr6:74658170-74658428	chr15	-	-	chr8:4628817-4629074	chr8	4511736	117081	chr1:163304086-163304346	chr1	162752547	551539	chr21:35398188-35398448	chr21	35267943	130245
chr4:150303463-150303687	ENSG00000170390	150999426	695739	chr19:46612759-46612981	chr2	-	-	chr15:47510082-47510297	chr15	48119273	608976	chr2:83865755-83865974	chr2	83278289	587466	chr17:8473355-8473574	chr17	7742116	731239
chr18:54100741-54100811	ENSG00000091157	54318574	217763	chr18:63588776-63588846	chr18	58326472	5262304	chr1:19337505-19337575	chr1	19157893	179612	chr8:73948440-73948510	chr8	74126513	178003	chr24:56267016-56267086	chr24	56467339	200253
chr2:220783622-220784122	ENSG00000124006	220436581	347041	chr9:89298450-89298951	chr9	82469082	6829368	chr37:26364730-26365229	chr37	26079752	284978	chr6:9343845-9344343	chr6	9063215	280630	chr2:108556786-108557288	chr2	108226115	330671
chr5:117589318-117589635	ENSG00000169570	118324240	734605	chr18:43579162-43579479	chr14	-	-	chr11:7803863-7804181	chr11	8346507	542326	chr14:54672829-54673145	chr14	54153274	519555	chr7:36827835-36828149	chr7	36230534	597301
chr3:62487694-62487762	ENSG00000153266	62359999	127695	chr15:19634526-19634596	chr15	16854938	2779588	chr20:28576935-28577002	chr20	28704683	127681	chr16:26569871-26569939	chr16	26692919	122980	chr22:38939032-38939100	chr22	39068358	129258
chr8:20736872-20737106	ENSG00000061337	20161474	575398	chr15:57282737-57282968	chr16	-	-	chr25:36233920-36234154	chr25	36804789	570635	chr2:49940436-49940670	chr2	49368485	571951	chr8:68617351-68617584	chr8	67867782	749569
chr9:76538387-76538749	ENSG00000198963	77112281	573532	chr1:244414214-244414576	chr1	241354363	3059851	chr1:84130952-84131330	chr1	83666066	464886	chr23:17124179-17124545	chr23	17582328	457783	chr8:50365557-50365921	chr8	50874906	508985
chr5:51786801-51786886	ENSG00000213949	52083730	296844	chr2:66113132-66113217	chr2	71763917	5650700	chr4:62695407-62695493	chr4	62455624	239783	chr21:19373582-19373667	chr21	19153982	219600	chr20:26570405-26570490	chr20	26293313	277092
chr3:184442826-184442920	ENSG00000177383	184429836	12990	chr11:86475274-86475398	chr1	-	-	chr34:17557435-17557529	chr34	17544950	12485	chr19:23043161-23043255	chr19	23030761	12400	chr1:83078287-83078381	chr1	83090389	12008
chr5:51858402-51858627	ENSG00000213949	52083730	225103	chr2:66051858-66052084	chr2	71763917	5711833	chr4:62640955-62641180	chr4	62455624	185331	chr21:19323300-19323526	chr21	19153982	169318	chr20:26502874-26503100	chr20	26293313	209561
chr15:46064034-46064086	ENSG00000137767	45923346	140688	chr3:125275380-125275430	chr3	121456387	3818993	chr30:12098017-12098069	chr30	11977400	120617	chr1:143767190-143767242	chr1	143866407	99165	chr10:64934291-64934343	chr10	65071130	136787
chr18:53967809-53967902	ENSG00000091157	54318574	350672	chr18:63711658-63711748	chr18	58326472	5385186	chr1:19453400-19453489	chr1	19157893	295507	chr8:73835663-73835753	chr8	74126513	290760	chr24:56147892-56147982	chr24	56467339	319357
chr18:30198302-30198430	ENSG00000141441	30050447	147855	chr18:12258677-12258805	chr18	14769099	2510294	chr7:57100591-57100730	chr7	57295067	194337	chr8:53379482-53379610	chr8	53246251	133231	chr24:24827463-24827607	chr24	25005192	177585
chr5:51841831-51841927	ENSG00000213949	52083730	241803	chr2:66067517-66067609	chr2	71763917	5696308	chr4:62654832-62654929	chr4	62455624	199208	chr21:19337943-19338040	chr21	19153982	183961	chr20:26524189-26524288	chr20	26293313	230876
chr7:112922736-112922788	ENSG00000164604	112727833	194903	chr4:40061077-40061128	chr4	43719803	3658675	chr14:52753857-52753911	chr14	52573892	179965	chr4:70931855-70931909	chr4	70763801	168054	chr4:55472312-55472365	chr4	55640695	168330
chr16:51853955-51854905	ENSG00000103449	51185278	668677	chr19:29876738-29877690	chr19	34379537	4501847	chr2:63654480-63655429	chr2	64244559	589130	chr3:4564943-4565890	chr3	3987210	577733	chr18:20374565-20375513	chr18	19654593	719972
chr2:221960192-221960428	ENSG00000116106	222438922	478494	chr9:90442802-90443048	chr9	83022498	7420304	chr37:27368784-27369023	chr37	27805314	436291	chr6:10363697-10363940	chr6	10795190	431250	chr2:109878504-109878743	chr2	110405363	526620
chr11:14408506-14408756	ENSG00000133818	14386052	22454	chr1:190594912-190595163	chr1	185987005	4607907	chr21:37135092-37135337	chr21	37119830	15262	chr7:82971757-82972005	chr7	82955303	16454	chr15:38868126-38868374	chr15	38891936	23562
chr7:115084461-115084714	ENSG00000135272	114562209	522252	chr4:44095445-44095691	chr4	41790494	2304951	chr14:54520790-54521043	chr14	54063568	457222	chr4:72698708-72698965	chr4	72206834	491874	chr4:53320482-53320735	chr4	53854749	534014
chr16:73356182-73356284	ENSG00000140836	73093597	262585	chr19:51524326-51524427	chr19	53739472	2215045	chr5:78913969-78914071	chr5	78610027	303942	chr3:20779140-20779242	chr3	21001311	222069	chr18:38014316-38014418	chr18	38186022	171604
chr2:78300752-78300901	ENSG00000176204	77820445	480307	chr4:178718196-178718342	chr4	175391882	3326314	chr17:45703474-45703624	chr17	46091137	387513	chr15:25518925-25519077	chr15	25944957	425880	chr11:57925638-57925788	chr11	58431067	505279
chr12:65911460-65911746	ENSG00000174099	65672423	239037	chr7:65742496-65742783	chr7	62954845	2787651	chr10:8096563-8096851	chr10	7911920	184643	chr6:81150144-81150432	chr6	80995064	155080	chr5:48492496-48492784	chr5	48702835	210051
chr4:150240517-150240716	ENSG00000170390	150999426	758710	chr19:46556025-46556220	chr2	-	-	chr15:47462498-47462697	chr15	48119273	656576	chr2:83907191-83907390	chr2	83278289	628902	chr17:8537477-8537672	chr17	7742116	795361
chr2:221298043-221298188	ENSG00000124006	220436581	861462	chr9:89800871-89801014	chr9	82469082	7331789	chr37:26794920-26795065	chr37	26079752	715168	chr6:9792628-9792773	chr6	9063215	729413	chr2:109108025-109108171	chr2	108226115	881910
chrX:27816205-27816358	ENSG00000177689	27826107	9749	chrX:59304289-59304442	chrX	61814441	2509999	chrX:22967440-22967593	chrX	22982277	14684	chrX:21363974-21364127	chrX	21386525	22398	chrX:121992554-121992706	chrX	121979512	13042
chr8:20382170-20382424	ENSG00000061337	20161474	220696	chr15:57757461-57757710	chr16	-	-	chr25:36550876-36551131	chr25	36804789	253658	chr2:49588921-49589175	chr2	49368485	220436	chr8:68195942-68196197	chr8	67867782	328160
chrX:113695737-113695812	ENSG00000147246	113818551	122739	chrX:36955481-36955557	chrX	118225792	81270235	chrX:87235954-87236029	chrX	87342807	106778	chrX:90558794-90558869	chrX	90649497	90628	chrX:67635326-67635398	chrX	67739107	103709
chr5:103780440-103780588	ENSG00000112874	102898494	881946	chr9:108833988-108834135	chr9	105294901	3539087	chr3:6943995-6944142	chr3	7697470	753328	chr14:66039316-66039463	chr14	66749358	709895	chr7:106017747-106017894	chr7	105045004	972743
chr2:140341009-140341081	ENSG00000144227	139537918	803091	chr3:29580890-29580960	chr3	68828	29512062	chr19:42082312-42082382	chr19	41318893	763419	chr18:22955197-22955268	chr18	22271482	683715	chr2:57699392-57699462	chr2	58582460	882998
chr18:30190817-30191015	ENSG00000141441	30050447	140370	chr18:12251409-12251609	chr18	14769099	2517490	chr7:57106444-57106644	chr7	57295067	188423	chr8:53373369-53373566	chr8	53246251	127118	chr24:24843235-24843437	chr24	25005192	161755
chrX:136137886-136137993	ENSG00000147274	135962923	174963	chrX:140385292-140385405	chrX	154518145	14132740	chrX:107331709-107331816	chrX	107182418	149291	chrX:109033605-109033709	chrX	108889708	143897	chrX:20603714-20603821	chrX	20462823	140891
chr3:177962253-177962777	ENSG00000197584	177990720	27943	chr2:125841732-125842256	chr2	137954821	12112565	chr34:41539974-41540497	chr34	41963562	423065	chr19:17599629-17600151	chr19	17863925	263774	chr1:89369559-89370092	chr1	89080346	289213
chr9:104630558-104630931	ENSG00000198785	104500862	129696	chr5:71970596-71970968	chr5	69564696	2405900	chr11:58555326-58555704	chr11	58422278	133048	chr25:8172200-8172573	chr25	8054706	117494	chr8:93344014-93344385	chr8	93146121	197893
chr4:141153634-141153921	ENSG00000153130	141178440	24519	chr2:161037051-161037342	chr19	-	-	chr19:2588861-2589148	chr19	2566489	22372	chr2:91217462-91217751	chr2	91194812	22650	chr17:17785278-17785561	chr17	17757670	27608
chr1:81563426-81563521	ENSG00000117114	81771845	208324	chr2:273410350-273410446	chr2	277602151	4191705	chr6:66390808-66390902	chr6	66216074	174734	chr5:82256536-82256630	chr5	81707657	548879	chr3:63574214-63574307	chr3	63355165	219049
chr7:115028507-115028722	ENSG00000135272	114562209	466298	chr4:44026876-44027086	chr4	41790494	2236382	chr14:54477090-54477308	chr14	54063568	413522	chr4:72639191-72639406	chr4	72206834	432357	chr4:53367756-53367971	chr4	53854749	486778
chr1:81615030-81615181	ENSG00000117114	81771845	156664	chr2:273357305-273357457	chr2	277602151	4244694	chr6:66344383-66344534	chr6	66216074	128309	chr5:82211357-82211508	chr5	81707657	503700	chr3:63515163-63515314	chr3	63355165	159998
chr6:14306889-14307131	ENSG00000112149	14117872	189017	chr17:22807361-22807604	chr17	26364943	3557339	chr35:13657188-13657428	chr35	13489273	167915	chr20:13782802-13783044	chr20	13617586	165216	chr23:42189097-42189341	chr23	42354680	165339
chr3:191684375-191684595	ENSG00000152492	191046866	637509	chr11:79388073-79388291	chr11	83920149	4531858	chr34:23703048-23703268	chr34	23167476	535572	chr19:29180285-29180504	chr19	28671724	508561	chr1:76024826-76025338	chr1	76624452	599114
chr2:221374643-221375020	ENSG00000124006	220436581	938062	chr9:89877859-89878258	chr9	82469082	7408777	chr37:26868077-26868454	chr37	26079752	788325	chr6:9867512-9867888	chr6	9063215	804297	chr2:109205929-109206306	chr2	108226115	979814
chr9:7382383-7382623	ENSG00000178445	6645650	736733	chr5:95546705-95546939	chr1	-	-	chr11:28267085-28267316	chr11	27584474	682611	chr23:28453725-28453956	chr23	27814482	639243	chr8:37737378-37737609	chr8	38468512	730903
chr9:7172303-7172408	ENSG00000178445	6645650	526653	chr5:95057661-95057767	chr1	-	-	chr11:28099645-28099750	chr11	27584474	515171	chr23:28288611-28288716	chr23	27814482	474129	chr8:37985677-37985781	chr8	38468512	482731
chrX:23031519-23031603	ENSG00000184735	23018087	13432	chrX:42315552-42315635	chr8	-	-	chrX:18787447-18787531	chrX	18776371	11076	chrX:17479207-17479291	chrX	17468947	10260	chrX:127320260-127320344	chrX	127364927	44583
chrX:130551781-130551888	ENSG00000147255	130533677	18104	chr7:5412946-5413050	chrX	-	-	chrX:102556990-102557095	chrX	102376636	180354	chrX:104549695-104549802	chrX	104412220	137475	chrX:15382647-15382754	chrX	15202082	180565
chr7:107930985-107931436	ENSG00000091128	107770801	160184	chr6:74051543-74051994	chr6	58706265	15345278	chr18:12360286-12360738	chr18	12517121	156383	chr4:8182442-8182889	chr4	8035156	147286	chr4:49661907-49662357	chr4	49479289	182618
chr2:221771972-221772227	ENSG00000116106	222438922	666695	chr9:90276100-90276353	chr9	83022498	7253602	chr37:27203295-27203549	chr37	27805314	601765	chr6:10201940-10202195	chr6	10795190	592995	chr2:109646942-109647199	chr2	110405363	758164
chr2:221373967-221374172	ENSG00000124006	220436581	937386	chr9:89877180-89877376	chr9	82469082	7408098	chr37:26867371-26867578	chr37	26079752	787619	chr6:9866835-9867040	chr6	9063215	803620	chr2:109205265-109205470	chr2	108226115	979150
chr6:39438644-39438916	ENSG00000095981	39290744	147900	chr9:12055339-12055621	chr15	-	-	chr12:8370168-8370442	chr12	8232029	138139	chr20:38986005-38986280	chr20	38853900	132105	chr23:13317776-13318052	chr23	13181359	136417
chr18:58454191-58454272	ENSG00000166603	58040001	414190	chr13:28907125-28907206	chr18	-	-	chr1:15866755-15866836	chr1	16131567	264731	chr8:77459008-77459089	chr8	77171048	287960	chr24:59917304-59917383	chr24	59672094	245210
chr4:130887216-130887519	ENSG00000151466	130014764	872452	chr2:153322515-153322816	chr2	148271696	5050819	chr19:11174696-11175000	chr19	12001306	826306	chr2:99433984-99434276	chr2	100183877	749601	chr17:28130190-28130491	chr17	29126352	995861
chr6:14501125-14501386	ENSG00000112149	14117872	383253	chr17:22965246-22965506	chr17	26364943	3399437	chr35:13827572-13827833	chr35	13489273	338299	chr20:13962503-13962764	chr20	13617586	344917	chr23:42031283-42031542	chr23	42354680	323138
chrX:113787529-113787742	ENSG00000147246	113818551	30809	chrX:37053208-37053422	chrX	118225792	81172370	chrX:87316513-87316726	chrX	87342807	26081	chrX:90626470-90626684	chrX	90649497	22813	chrX:67710198-67710406	chrX	67739107	28701
chr5:109837009-109837078	ENSG00000164209	110073837	236759	chr9:112618548-112618619	chr18	-	-	chr3:1853686-1853755	chr3	1719781	133905	chr14:61005232-61005301	chr14	60895084	110148	chr7:112150258-112150327	chr7	112332867	182540
chr2:145924456-145924820	ENSG00000169554	145282147	642309	chr3:39105882-39106246	chr3	35196121	3909761	chr19:47173545-47173910	chr19	46550583	622962	chr18:28059417-28059786	chr18	27461817	597600	chr2:51547219-51547585	chr2	52274862	727277
chr18:53969657-53969865	ENSG00000091157	54318574	348709	chr18:63709451-63709661	chr18	58326472	5382979	chr1:19451104-19451316	chr1	19157893	293211	chr8:73837510-73837721	chr8	74126513	288792	chr24:56151522-56151734	chr24	56467339	315605
chr18:52968254-52968396	ENSG00000166510	52626739	341515	chr18:64623612-64623755	chr18	67564699	2940944	chr1:20344103-20344242	chr1	20641290	297048	chr8:72969026-72969168	chr8	72654605	314421	chr24:55140394-55140532	chr24	54786447	353947
chr3:110435002-110435186	ENSG00000177707	110788918	353732	chr11:59940937-59941133	chr11	62144557	2203424	chr33:15597522-15597706	chr33	15871172	273466	chr19:46638827-46639011	chr19	46336940	301887	chr1:55977005-55977185	chr1	56308185	331000
chr3:90054625-90054676	ENSG00000044524	89156674	897951	chr13:1559553-1559603	chr11	-	-	chr33:1444191-1444242	chr33	785725	658466	chr26:892210-892261	chr26	1656872	764611	chr1:37577429-37577480	chr1	36715182	862247
chr9:82997094-82997151	ENSG00000106829	82186688	810406	chr5:90944412-90944467	chr1	-	-	chr1:78469261-78469318	chr1	79269883	800565	chr23:11628749-11628806	chr23	12316041	687235	chr8:56580090-56580146	chr8	55837380	742710
chr2:221331278-221331533	ENSG00000124006	220436581	894697	chr9:89834461-89834723	chr9	82469082	7365379	chr37:26824911-26825168	chr37	26079752	745159	chr6:9825502-9825757	chr6	9063215	762287	chr2:109155665-109155920	chr2	108226115	929550
chr6:14630350-14630557	ENSG00000112149	14117872	512478	chr17:23082329-23082536	chr17	26364943	3282407	chr35:13947691-13947899	chr35	13489273	458418	chr20:14094339-14094546	chr20	13617586	476753	chr23:41910758-41910959	chr23	42354680	443721
chr18:53945817-53946179	ENSG00000091157	54318574	372395	chr18:63730138-63730498	chr18	58326472	5403666	chr1:19472504-19472868	chr1	19157893	314611	chr8:73816848-73817211	chr8	74126513	309302	chr24:56122389-56122745	chr24	56467339	344594
chr8:27758103-27758190	ENSG00000168078	27695612	62491	chr15:52891249-52891361	chr15	49103281	3787968	chr25:29683374-29683461	chr25	29755848	72387	chr2:56499735-56499821	chr2	56418955	80780	chr8:10763648-10763735	chr8	10819982	56247
chr8:36103879-36104111	ENSG00000215262	36641842	537731	chr16:67570763-67570996	chr16	70663273	3092277	chr16:28908465-28908697	chr16	28478384	430081	chr27:9125030-9125261	chr27	8699565	425465	chr27:31423850-31424082	chr27	31849126	425044
chr3:110375940-110376258	ENSG00000177707	110788918	412660	chr11:59883871-59884189	chr11	62144557	2260368	chr33:15556737-15557057	chr33	15871172	314115	chr19:46688703-46689024	chr19	46336940	351763	chr1:55926098-55926424	chr1	56308185	381761
chr2:67878661-67878725	ENSG00000143971	67624451	254210	chr14:99663394-99663460	chr14	102047669	2384209	chr10:66844216-66844281	chr10	66631403	212813	chr15:34455186-34455251	chr15	34678370	223119	chr11:66071122-66071187	chr11	65813352	257770
chr7:114975742-114976050	ENSG00000135272	114562209	413533	chr4:43973905-43974206	chr4	41790494	2183411	chr14:54431166-54431475	chr14	54063568	367598	chr4:72595741-72596050	chr4	72206834	388907	chr4:53415781-53416089	chr4	53854749	438660
chr16:50978081-50978147	ENSG00000103449	51185278	207131	chr19:30164916-30164986	chr19	34379537	4214551	chr2:64428216-64428283	chr2	64245467	182749	chr3:3808880-3808950	chr3	3978895	169945	chr18:19450597-19450667	chr18	19653740	203073
chr2:59311129-59311413	ENSG00000115392	58468507	842622	chr14:105829636-105829922	chr14	110369224	4539302	chr10:59385204-59385484	chr10	58632368	752836	chr15:41809409-41809693	chr15	42591277	781584	chr11:41677306-41677589	chr11	40744419	932887
chr5:98705856-98705916	ENSG00000153922	98262240	443616	chr9:101417245-101417304	chr1	-	-	chr3:10928344-10928402	chr3	11288970	360568	chr14:70126573-70126633	chr14	70498333	371700	chr7:101080105-101080165	chr7	100565742	514363
chr15:46073867-46074102	ENSG00000137767	45923346	150521	chr3:125300151-125300385	chr3	121456387	3843764	chr30:12110825-12111059	chr30	11977400	133425	chr1:143757341-143757576	chr1	143866407	108831	chr10:64922691-64922926	chr10	65071130	148204
chr9:7548257-7548327	ENSG00000178445	6645650	902607	chr5:95826406-95826473	chr1	-	-	chr11:28409804-28409874	chr11	27584474	825330	chr23:28594080-28594150	chr23	27814482	779598	chr8:37525725-37525795	chr8	38468512	942717
chr5:51744756-51745001	ENSG00000213949	52083730	338729	chr2:66157295-66157545	chr2	71763917	5606372	chr4:62733225-62733474	chr4	62455624	277601	chr21:19412900-19413151	chr21	19153982	258918	chr20:26621852-26622099	chr20	26293313	328539
chr1:222395534-222395586	ENSG00000143512	222721445	325859	chr13:106718286-106718336	chr13	101018647	5699639	chr38:16588239-16588291	chr38	16818334	230043	chr30:12109504-12109556	chr30	12368988	259432	chr16:26461506-26461558	chr16	26741134	279576
chrX:22957924-22958027	ENSG00000184735	23018087	60060	chrX:42167596-42167699	chr8	-	-	chrX:18715006-18715109	chrX	18776371	61262	chrX:17292011-17292114	chrX	17345722	53608	chrX:127446725-127446828	chrX	127364927	81798
chr9:83081931-83082172	ENSG00000106829	82186688	895243	chr5:91051228-91051466	chr1	-	-	chr1:78539794-78540035	chr1	79269883	729848	chr23:11552365-11552605	chr23	12316041	763436	chr8:56667827-56668067	chr8	55837380	830447
chr2:221720190-221720589	ENSG00000116106	222438922	718333	chr9:90219092-90219495	chr9	83022498	7196594	chr37:27158236-27158636	chr37	27805314	646678	chr6:10158068-10158467	chr6	10795190	636723	chr2:109586066-109586465	chr2	110405363	818898
chr2:59309489-59309773	ENSG00000115392	58468507	840982	chr14:105831330-105831610	chr14	110369224	4537614	chr10:59383531-59383819	chr10	58632368	751163	chr15:41811067-41811352	chr15	42591277	779925	chr11:41675594-41675877	chr11	40744419	931175
chr7:42433058-42433115	ENSG00000106571	42277469	155589	chr2:111921781-111921839	chr17	-	-	chr18:7680143-7680200	chr18	7800858	120658	chr4:13495296-13495353	chr4	13366275	129021	chr4:79320818-79320873	chr4	79444274	123401
chr18:52700342-52701207	ENSG00000166510	52626739	73603	chr18:64866636-64867543	chr18	67564699	2697156	chr1:20574159-20575019	chr1	20641290	66271	chr8:72733095-72733961	chr8	72654605	78490	chr24:54864914-54865776	chr24	54786447	78467
chr5:117797306-117797456	ENSG00000169570	118324240	526784	chr18:42959119-42959269	chr14	-	-	chr11:7962360-7962510	chr11	8346507	383997	chr14:54518311-54518461	chr14	54153274	365037	chr7:36624385-36624534	chr7	36230534	393851
chr10:87079190-87079571	ENSG00000199104	88024545	944974	chr16:12672479-12672856	chr16	9574932	3097547	chr4:33317444-33317827	chr4	34073429	755602	chr1:84898652-84899032	chr1	84117509	781143	chr28:40484915-40485295	chr28	41329149	843854
chr18:30108927-30109313	ENSG00000141441	30050447	58480	chr18:12168998-12169384	chr18	14769099	2599715	chr7:57177220-57177604	chr7	57295067	117463	chr8:53298033-53298416	chr8	53246251	51782	chr24:24939046-24939432	chr24	25005192	65760
chr6:14593268-14593368	ENSG00000112149	14117872	475396	chr17:23039057-23039154	chr17	26364943	3325789	chr35:13910291-13910390	chr35	13489273	421018	chr20:14055177-14055276	chr20	13617586	437591	chr23:41948240-41948340	chr23	42354680	406340
chr11:79534638-79534848	ENSG00000149256	79151992	382646	chr1:159661191-159661400	chr1	167398961	7737561	chr21:19145078-19145287	chr21	19502511	357224	chr7:64859920-64860129	chr7	65193196	333067	chr29:16222146-16222355	chr29	16642421	420066
chrX:76191893-76192105	ENSG00000196468	76709648	517543	chrX:77129494-77129706	chrX	55910572	21218922	chrX:59423414-59423622	chrX	59739397	315775	chrX:57191162-57191373	chrX	57443444	252071	chrX:80285669-80285878	chrX	79954814	330855
chr5:157944107-157944501	ENSG00000164330	158526769	582268	chr10:30168274-30168668	chr10	23523689	6644585	chr4:51919854-51920248	chr4	51378963	540891	chr14:20931397-20931788	chr14	20400279	531118	chr7:72207622-72208026	chr7	72804182	596156
chr5:50974091-50974302	ENSG00000016082	50678921	295170	chr2:69639346-69639552	chr2	66884387	2754959	chr4:63364209-63364421	chr4	63648648	284227	chr21:20015145-20015355	chr21	20306385	291030	chr20:27395127-27395338	chr20	27755504	360166
chr12:99567401-99567451	ENSG00000180219	100041531	474080	chr7:31342899-31342950	chr13	-	-	chr15:38522985-38523036	chr15	38890120	367084	chr28:23534526-23534578	chr28	23899793	365215	chr5:63677869-63677918	chr5	64094901	416983
chr2:84359412-84359473	ENSG00000163541	84687169	327696	chr4:168690369-168690431	chr4	165937928	2752441	chr17:40634844-40634905	chr17	40393146	241698	chr15:20112548-20112609	chr15	19834367	278181	chr11:50794868-50794929	chr11	50400444	394424
chr5:50896381-50896467	ENSG00000016082	50678921	217460	chr2:69728255-69728342	chr2	66884387	2843868	chr4:63431718-63431804	chr4	63648648	216844	chr21:20080999-20081085	chr21	20306385	225300	chr20:27481790-27481876	chr20	27755504	273628
chr2:124207696-124208145	ENSG00000155052	124782864	574719	chr13:16775969-16776525	chr13	20631641	3855116	chr19:26891706-26892167	chr19	26397894	493812	chr18:7153833-7154294	chr18	6667430	486403	chr2:75753259-75753726	chr2	76308191	554465
chrX:27815678-27816037	ENSG00000177689	27826107	10070	chrX:59304597-59304949	chrX	61814441	2509492	chrX:22966924-22967271	chrX	22982277	15006	chrX:21363461-21363804	chrX	21386525	22721	chrX:121992876-121993224	chrX	121979512	13364
chr2:220885175-220885240	ENSG00000124006	220436581	448594	chr9:89409479-89409543	chr9	82469082	6940397	chr37:26452201-26452266	chr37	26079752	372449	chr6:9435059-9435124	chr6	9063215	371844	chr2:108663471-108663536	chr2	108226115	437356
chr18:52900035-52900429	ENSG00000166510	52626739	273296	chr18:64688494-64688889	chr18	67564699	2875810	chr1:20412125-20412519	chr1	20641290	228771	chr8:72903291-72903685	chr8	72654605	248686	chr24:55061640-55062027	chr24	54786447	275193
chr12:99739481-99739541	ENSG00000180219	100041531	301990	chr7:31189895-31189953	chr13	-	-	chr15:38645139-38645200	chr15	38890120	244920	chr28:23670213-23670274	chr28	23899793	229519	chr5:63846639-63846701	chr5	64094901	248200
chr5:117710558-117710684	ENSG00000169570	118324240	613556	chr18:42867257-42867382	chr14	-	-	chr11:7891532-7891658	chr11	8346507	454849	chr14:54580101-54580226	chr14	54153274	426827	chr7:36707293-36707420	chr7	36230534	476759
chr12:31164283-31164379	ENSG00000013573	31226779	62400	chr4:231059716-231059810	chr9	-	-	chr27:41554317-41554412	chr27	42072469	518057	chr6:31161055-31161151	chr6	30642352	518703	chr5:107071731-107071826	chr5	107471737	399911
chr2:119666257-119666458	ENSG00000019169	119699742	33284	chr13:41575554-41575749	chr16	-	-	chr19:31064267-31064467	chr19	31034554	29713	chr18:12141012-12141212	chr18	12116728	24284	chr2:71043124-71043324	chr2	71099006	55682
chr8:36254549-36254623	ENSG00000215262	36641842	387219	chr16:67757014-67757086	chr16	70663273	2906187	chr16:28780841-28781487	chr16	28478384	302457	chr27:9001834-9001908	chr27	8699565	302269	chr27:31528682-31528756	chr27	31849126	320370
chr2:221859838-221859935	ENSG00000116106	222438922	578987	chr9:90352401-90352504	chr9	83022498	7329903	chr37:27285524-27285619	chr37	27805314	519695	chr6:10285977-10286074	chr6	10795190	509116	chr2:109769964-109770061	chr2	110405363	635302
chr2:138134056-138134256	ENSG00000150540	138721590	587334	chr13:51712823-51713028	chr3	-	-	chr19:40071473-40071677	chr19	40656232	584555	chr18:21017252-21017458	chr18	21516160	498702	chr2:60123973-60124177	chr2	59417441	706532
chr5:157997045-157997167	ENSG00000164330	158526769	529602	chr10:30110281-30110403	chr10	23523689	6586592	chr4:51870617-51870739	chr4	51378963	491654	chr14:20883464-20883586	chr14	20400279	483185	chr7:72273318-72273440	chr7	72804182	530742
chr2:220641145-220641363	ENSG00000124006	220436581	204564	chr9:89145878-89146089	chr9	82469082	6676796	chr37:26258476-26258694	chr37	26079752	178724	chr6:9234623-9234841	chr6	9063215	171408	chr2:108418251-108418470	chr2	108226115	192136
chr1:81733956-81734060	ENSG00000117114	81771845	37785	chr2:273262515-273262719	chr2	277602151	4339432	chr6:66256975-66257079	chr6	66216074	40901	chr5:82122832-82122933	chr5	81707657	415175	chr3:63412086-63412190	chr3	63355165	56921
chr5:106169025-106169269	ENSG00000184349	107006596	837327	chr9:106670763-106671003	chr9	109897850	3226847	chr3:5087375-5087619	chr3	4272185	815190	chr14:64186405-64186651	chr14	63631090	555315	chr7:108382804-108383048	chr7	109097540	714492
chr5:43997987-43998368	ENSG00000070193	44389808	391440	chr2:67575274-67575656	chr2	70046330	2470674	chr4:66129799-66130179	chr4	65852049	277750	chr21:22810458-22810839	chr21	22528845	281613	chr20:30898126-30898503	chr20	30611286	286840
chr6:163184079-163184355	ENSG00000185345	163148803	35276	chr1:52080345-52080620	chr1	49909479	2170866	chr1:51232110-51232387	chr1	51201786	30324	chr31:4255403-4255680	chr31	3991233	264170	chr9:99679909-99680187	chr9	99648791	31118
chr2:220703212-220703502	ENSG00000124006	220436581	266631	chr9:89213694-89213986	chr9	82469082	6744612	chr37:26295564-26295855	chr37	26079752	215812	chr6:9273705-9273996	chr6	9063215	210490	chr2:108468463-108468755	chr2	108226115	242348
chr6:163792126-163792245	ENSG00000112531	163835032	42787	chr1:49224188-49224310	chr1	52104730	2880420	chr1:51764171-51764289	chr1	51799714	35425	chr31:4735820-4735938	chr31	4808499	72561	chr9:100237955-100238074	chr9	100370771	132697
chr9:7456827-7457442	ENSG00000178445	6645650	811177	chr5:95645329-95645940	chr1	-	-	chr11:28325950-28326564	chr11	27584474	741476	chr23:28508081-28508694	chr23	27814482	693599	chr8:37617748-37618360	chr8	38468512	850152
chr4:141163261-141163401	ENSG00000153130	141178440	15039	chr2:161047377-161047518	chr19	-	-	chr19:2580748-2580888	chr19	2566489	14259	chr2:91209018-91209158	chr2	91194812	14206	chr17:17773752-17773892	chr17	17757670	16082
chr6:114379472-114379694	ENSG00000196591	114332472	47000	chr20:42277625-42277850	chr20	44827687	2549837	chr12:70141853-70142077	chr12	70072758	69095	chr10:63041660-63041882	chr10	62976771	64889	chr9:36842108-36842330	chr9	36918295	75965
chr9:7212471-7212538	ENSG00000178445	6645650	566821	chr5:95248068-95248135	chr1	-	-	chr11:28142846-28142913	chr11	27584474	558372	chr23:28331457-28331524	chr23	27814482	516975	chr8:37868817-37868882	chr8	38468512	599630
chr3:147903299-147903417	ENSG00000144891	148415571	512154	chr8:97452579-97452698	chr2	-	-	chr23:43168377-43168495	chr23	43613937	445442	chr16:81143994-81144113	chr16	81548815	404702	chr1:121000455-121000574	chr1	120445395	555060
chrX:22977450-22977612	ENSG00000184735	23018087	40475	chrX:42206248-42206410	chr8	-	-	chrX:18738783-18738945	chrX	18776371	37426	chrX:17313881-17314043	chrX	17345722	31679	chrX:127422532-127422694	chrX	127364927	57605
chr2:221867485-221867689	ENSG00000116106	222438922	571233	chr9:90361043-90361251	chr9	83022498	7338545	chr37:27292009-27292210	chr37	27805314	513104	chr6:10293344-10293548	chr6	10795190	501642	chr2:109779243-109779448	chr2	110405363	625915
chr4:45103468-45103740	ENSG00000163281	44728612	374856	chr14:40658742-40659008	chr14	62736435	22077427	chr13:41503331-41503604	chr13	41228560	274771	chr3:83248077-83248349	chr3	83528289	279940	chr6:65341547-65341816	chr6	64992219	349328
chr2:140123990-140124050	ENSG00000144227	139537918	586072	chr3:29238764-29238824	chr3	68828	29169936	chr19:41919489-41919549	chr19	41318893	600596	chr18:22782263-22782323	chr18	22271482	510781	chr2:57945758-57945816	chr2	58582460	636644
chr3:62496240-62496313	ENSG00000153266	62359999	136241	chr15:19626552-19626626	chr15	16854938	2771614	chr20:28569971-28570044	chr20	28704683	134639	chr16:26562099-26562172	chr16	26692919	130747	chr22:38930812-38930885	chr22	39068358	137473
chr3:110473464-110473686	ENSG00000177707	110788918	315232	chr11:59982575-59982798	chr11	62144557	2161759	chr33:15632334-15632556	chr33	15871172	238616	chr19:46606232-46606454	chr19	46336940	269292	chr1:56018132-56018354	chr1	56308185	289831
chr5:102000001-102000266	ENSG00000145730	102089685	89419	chr9:104635533-104635807	chr9	110737325	6101518	chr3:8496571-8496858	chr3	8290489	206082	chr14:67545342-67545610	chr14	67474600	70742	chr7:104094826-104095102	chr7	104175550	80448
chr4:150629501-150629862	ENSG00000170390	150999426	369564	chr19:47342862-47343210	chr2	-	-	chr15:47795550-47795927	chr15	48119273	323346	chr2:83576104-83576477	chr2	83278289	297815	chr17:8143549-8143921	chr17	7742116	401433
chr1:222199812-222199871	ENSG00000143507	221915518	284294	chr13:106859231-106859289	chr13	108932783	2073494	chr38:16460310-16460369	chr38	16233730	226580	chr30:11958681-11958740	chr30	11729570	229111	chr16:26255493-26255552	chr16	25936963	318530
chr5:50959016-50959171	ENSG00000016082	50678921	280095	chr2:69651158-69651315	chr2	66884387	2766771	chr4:63377091-63377245	chr4	63648648	271403	chr21:20026241-20026397	chr21	20306385	279988	chr20:27412372-27412525	chr20	27755504	342979
chr2:221899785-221899893	ENSG00000116106	222438922	539029	chr9:90387320-90387428	chr9	83022498	7364822	chr37:27322919-27323026	chr37	27805314	482288	chr6:10319953-10320058	chr6	10795190	475132	chr2:109811072-109811180	chr2	110405363	594183
chr13:76706728-76706906	ENSG00000136153	76194570	512158	chr15:90283469-90283649	chr15	87900117	2383352	chr22:29859730-29859909	chr22	29519369	340361	chr17:49126546-49126724	chr17	48815013	311533	chr12:51488699-51488876	chr12	51141637	347062
chr11:14436488-14436571	ENSG00000133818	14386052	50436	chr1:190620540-190620622	chr1	185987005	4633535	chr21:37156107-37156189	chr21	37119830	36277	chr7:82991790-82991873	chr7	82955303	36487	chr15:38846478-38846557	chr15	38891936	45379
chr7:107889708-107889769	ENSG00000091128	107770801	118907	chr6:74086924-74086985	chr6	58706265	15380659	chr18:12392132-12392193	chr18	12517121	124928	chr4:8153620-8153681	chr4	8035156	118464	chr4:49627214-49627272	chr4	49479289	147925
chr8:117670114-117670387	ENSG00000147679	117778742	108355	chr6:116808131-116808403	chr7	-	-	chr13:16120085-16120358	chr13	16213190	92832	chr9:60136651-60136924	chr9	60233194	96270	chr14:49813954-49814227	chr14	49714027	99927
chr5:51743984-51744203	ENSG00000213949	52083730	339527	chr2:66158052-66158271	chr2	71763917	5605646	chr4:62733980-62734199	chr4	62455624	278356	chr21:19413672-19413888	chr21	19153982	259690	chr20:26622621-26622836	chr20	26293313	329308
chr1:81398863-81399049	ENSG00000117114	81771845	372796	chr2:273608176-273608357	chr2	277602151	3993794	chr6:66533813-66534000	chr6	66216074	317739	chr5:82390365-82390552	chr5	81707657	682708	chr3:63741991-63742178	chr3	63355165	386826
chr5:117715905-117716022	ENSG00000169570	118324240	608218	chr18:42873638-42873755	chr14	-	-	chr11:7896653-7896769	chr11	8346507	449738	chr14:54575068-54575183	chr14	54153274	421794	chr7:36692724-36692838	chr7	36230534	462190
chr2:145943516-145943744	ENSG00000169554	145282147	661369	chr3:39121345-39121563	chr3	35196121	3925224	chr19:47189178-47189411	chr19	46550583	638595	chr18:28073456-28073688	chr18	27461817	611639	chr2:51527176-51527410	chr2	52274862	747452
chr3:177612286-177612351	ENSG00000197584	177990720	378369	chr2:126330243-126330307	chr2	137954821	11624514	chr34:41244791-41244856	chr34	41963562	718706	chr19:17287796-17287862	chr19	17863925	576063	chr1:89754462-89754527	chr1	89080346	674116
chr5:157916015-157916441	ENSG00000164330	158526769	610328	chr10:30194526-30194939	chr10	23523689	6670837	chr4:51946452-51946878	chr4	51378963	567489	chr14:20958256-20958679	chr14	20400279	557977	chr7:72180319-72180739	chr7	72804182	623443
chrX:22693552-22693632	ENSG00000184735	23018087	324455	chrX:41748705-41748790	chr8	-	-	chrX:18461760-18461839	chrX	18776371	314532	chrX:17084048-17084129	chrX	17345722	261593	chrX:127731134-127731215	chrX	127364927	366207
chr8:36027741-36028130	ENSG00000215262	36641842	613712	chr16:67514398-67514803	chr16	70663273	3148470	chr16:28968070-28968471	chr16	28478384	489686	chr27:9187654-9188057	chr27	8699565	488089	chr27:31356819-31357227	chr27	31849126	491899
chr16:16583941-16583996	ENSG00000091262	16317379	266562	chr1:193163207-193163262	chr1	103096453	90066754	chr6:27635160-27635215	chr6	27800215	165000	chr13:29473174-29473229	chr13	29615990	142761	chr25:14828234-14828289	chr25	14643302	184932
chr2:145956831-145956889	ENSG00000169554	145282147	674684	chr3:39132874-39132935	chr3	35196121	3936753	chr19:47202812-47202870	chr19	46550583	652229	chr18:28086905-28086963	chr18	27461817	625088	chr2:51512393-51512451	chr2	52274862	762411
chr2:67955849-67956395	ENSG00000143971	67624451	331398	chr14:99750154-99750676	chr14	102047669	2296993	chr10:66917449-66917995	chr10	66631403	286046	chr15:34377509-34378055	chr15	34678370	300315	chr11:66170460-66171007	chr11	65813352	357108
chr1:81578120-81578295	ENSG00000117114	81771845	193550	chr2:273403276-273403452	chr2	277602151	4198699	chr6:66385134-66385309	chr6	66216074	169060	chr5:82249419-82249594	chr5	81707657	541762	chr3:63565535-63565709	chr3	63355165	210370
chr8:20367559-20367618	ENSG00000061337	20161474	206085	chr15:57769116-57769175	chr16	-	-	chr25:36566778-36566837	chr25	36804789	237952	chr2:49576973-49577032	chr2	49368485	208488	chr8:68174467-68174526	chr8	67867782	306685
chr1:166164643-166164715	ENSG00000188859	166136206	28437	chr13:89951929-89952001	chr13	101283804	11331803	chr38:17257925-17257997	chr38	17292326	34329	chr5:31492398-31492470	chr5	31607112	114642	chr3:2723820-2723892	chr3	2774510	50618
chr3:184459832-184459982	ENSG00000177383	184429836	29996	chr11:86462701-86462853	chr1	-	-	chr34:17573548-17573701	chr34	17544950	28598	chr19:23057497-23057655	chr19	23030761	26736	chr1:83062391-83062545	chr1	83090389	27844
chr1:79306138-79306386	ENSG00000162618	79472403	166017	chr2:279307054-279307304	chr2	275294131	4012923	chr6:68221485-68221743	chr6	68082131	139354	chr5:84102894-84103150	chr5	83966577	136317	chr3:66100128-66100383	chr3	65921136	178992
chr2:59201403-59201684	ENSG00000115392	58468507	732896	chr14:105927121-105927388	chr14	110369224	4441836	chr10:59283128-59283399	chr10	58632368	650760	chr15:41909576-41909852	chr15	42591277	681425	chr11:41543622-41543898	chr11	40744419	799203
chr8:24501418-24501592	ENSG00000069206	24298443	202975	chr15:46429343-46429517	chr15	53190170	6760653	chr25:32813480-32813655	chr25	33007967	194312	chr2:53367220-53367395	chr2	53159180	208040	chr8:72765393-72765568	chr8	72552675	212718
chr2:15147098-15147173	ENSG00000162981	14772810	374288	chrX:51169397-51169476	chr6	-	-	chr17:10955900-10955979	chr17	10658501	297399	chr15:79373618-79373697	chr15	79674201	300504	chr11:83320979-83321057	chr11	83658987	337930
chr2:145849018-145849130	ENSG00000169554	145282147	566871	chr3:39016868-39016980	chr3	35196121	3820747	chr19:47089898-47090010	chr19	46550583	539315	chr18:27977836-27977947	chr18	27461817	516019	chr2:51644890-51645002	chr2	52274862	629860
chr2:112200972-112201055	ENSG00000153094	111876955	324017	chr3:129096992-129097073	chr3	126604489	2492503	chr17:35944180-35944262	chr17	35619812	324368	chr15:14542236-14542319	chr15	14233147	309089	chr11:865833-865915	chr11	1199790	333875
chr3:90075755-90075810	ENSG00000044524	89156674	919081	chr13:1530175-1530237	chr11	-	-	chr33:1453626-1453681	chr33	785725	667901	chr26:876250-876305	chr26	1656872	780567	chr1:37594881-37594935	chr1	36715182	879699
chr2:67953669-67953760	ENSG00000143971	67624451	329218	chr14:99747756-99747970	chr14	102047669	2299699	chr10:66915269-66915360	chr10	66631403	283866	chr15:34380133-34380224	chr15	34678370	298146	chr11:66168061-66168151	chr11	65813352	354709
chr16:51106433-51106988	ENSG00000103449	51185278	78290	chr19:30059892-30060448	chr19	34379537	4319089	chr2:64315313-64315868	chr2	64245467	69846	chr3:3921030-3921582	chr3	3978895	57313	chr18:19578621-19579176	chr18	19653740	74564
chr9:109211927-109212075	ENSG00000148143	109625378	413303	chr5:77951760-77951909	chr5	75809671	2142089	chr11:62082418-62082564	chr11	62401696	319132	chr25:12348763-12348912	chr25	12656077	307165	chr8:97868869-97869019	chr8	98274178	405159
chr2:67954887-67954944	ENSG00000143971	67624451	330436	chr14:99749094-99749151	chr14	102047669	2298518	chr10:66916506-66916561	chr10	66631403	285103	chr15:34378950-34379007	chr15	34678370	299363	chr11:66169254-66169311	chr11	65813352	355902
chr3:177501374-177501682	ENSG00000197584	177990720	489038	chr2:126455938-126456242	chr2	137954821	11498579	chr34:41163405-41163714	chr34	41963562	799848	chr19:17194171-17194474	chr19	17863925	669451	chr1:89890310-89890618	chr1	89080346	809964
chr1:81691620-81691913	ENSG00000117114	81771845	79932	chr2:273309775-273310071	chr2	277602151	4292080	chr6:66289493-66289788	chr6	66216074	73419	chr5:82156982-82157272	chr5	81707657	449325	chr3:63452642-63452932	chr3	63355165	97477
chr1:81766869-81767017	ENSG00000117114	81771845	4828	chr2:273226457-273226605	chr2	277602151	4375546	chr6:66221255-66221402	chr6	66216074	5181	chr5:82089992-82090140	chr5	81707657	382335	chr3:63360324-63360476	chr3	63355165	5159
chr9:106444709-106444805	ENSG00000136824	106856541	411736	chr5:70037939-70038039	chr5	73151949	3113910	chr11:59758950-59759045	chr11	60091674	332629	chr25:9700759-9700854	chr25	10059214	358360	chr8:94914813-94914908	chr8	95362953	448045
chr8:117660586-117660815	ENSG00000147679	117778742	117927	chr6:116802923-116803150	chr7	-	-	chr13:16109456-16109686	chr13	16213190	103504	chr9:60126807-60127036	chr9	60233194	106158	chr14:49825219-49825464	chr14	49714027	111192
chr6:104914404-104914558	ENSG00000085382	105307794	393236	chr19:62044125-62044277	chr20	-	-	chr12:61971377-61971532	chr12	62329980	358448	chr10:54918667-54918822	chr10	55242806	323984	chr9:46126292-46126447	chr9	45744424	381868
chrX:113791273-113791370	ENSG00000147246	113818551	27181	chrX:37068588-37068705	chrX	118225792	81157087	chrX:87322156-87322279	chrX	87342807	20528	chrX:90629990-90630087	chrX	90649497	19410	chrX:67715581-67715678	chrX	67739107	23429
chrX:23062876-23063003	ENSG00000184735	23018087	44789	chrX:42372507-42372634	chr8	-	-	chrX:18816491-18816619	chrX	18776371	40120	chrX:17393966-17394094	chrX	17345727	48239	chrX:127263784-127263911	chrX	127364927	101016
chr5:51722579-51722807	ENSG00000213949	52083730	360923	chr2:66168696-66168924	chr2	71763917	5594993	chr4:62753122-62753351	chr4	62455624	297498	chr21:19429361-19429589	chr21	19153982	275379	chr20:26654188-26654415	chr20	26293313	360875
chrX:105936739-105936897	ENSG00000133135	105937024	127	chrX:110829177-110829337	chr3	-	-	chrX:80241033-80241191	chrX	80241361	170	chrX:84241653-84241811	chrX	84241978	167	chrX:56946210-56946367	chrX	56946041	169
chr5:117847729-117847781	ENSG00000169570	118324240	476459	chr18:43024578-43024631	chr14	-	-	chr11:8005790-8005842	chr11	8346507	340665	chr14:54480215-54480268	chr14	54153274	326941	chr7:36578055-36578108	chr7	36230534	347521
chr14:54688796-54688989	ENSG00000100526	54863567	174578	chr15:24965401-24965596	chr15	27496685	2531089	chr8:30210332-30210525	chr8	30344957	134432	chr24:2596508-2596701	chr24	2726900	130199	chr10:67011529-67011723	chr10	67155090	143367
chr5:51787961-51788022	ENSG00000213949	52083730	295708	chr2:66111991-66112052	chr2	71763917	5651865	chr4:62694281-62694341	chr4	62455624	238657	chr21:19372453-19372514	chr21	19153982	218471	chr20:26569280-26569340	chr20	26293313	275967
chr2:84375605-84375902	ENSG00000163541	84687169	311267	chr4:168526426-168526722	chr4	165937928	2588498	chr17:40621361-40621657	chr17	40393146	228215	chr15:20098000-20098312	chr15	19834367	263633	chr11:50754795-50755091	chr11	50400444	354351
chr4:23696778-23697098	ENSG00000109606	24586173	889075	chr14:63385964-63386289	chr14	61248770	2137194	chr3:86362423-86362741	chr3	85549939	812484	chr3:100958513-100958838	chr3	100177256	781257	chr6:44744362-44744686	chr6	45683587	938901
chr8:20370179-20370514	ENSG00000061337	20161474	208705	chr15:57766873-57767206	chr16	-	-	chr25:36562677-36563013	chr25	36804789	241776	chr2:49579228-49579563	chr2	49368485	210743	chr8:68180093-68180429	chr8	67867782	312311
chr18:52833025-52833233	ENSG00000166510	52626739	206286	chr18:64743664-64743865	chr18	67564699	2820834	chr1:20458905-20459113	chr1	20641290	182177	chr8:72850957-72851165	chr8	72654605	196352	chr24:55003306-55003514	chr24	54786447	216859
chr13:76164678-76164883	ENSG00000136153	76194570	29687	chr15:89952267-89952465	chr15	87900117	2052150	chr22:29386851-29387053	chr22	29405539	18486	chr17:48687570-48687771	chr17	48705466	17695	chr12:50986857-50987060	chr12	51007714	20654
chr5:127221021-127221071	ENSG00000064651	127419458	198387	chr16:46259084-46259134	chr18	-	-	chr11:16947757-16947808	chr11	17143991	196183	chr14:46827277-46827327	chr14	46635433	191844	chr7:27286215-27286272	chr7	27064921	221294
chr8:36050775-36050945	ENSG00000215262	36641842	590897	chr16:67540285-67540452	chr16	70663273	3122821	chr16:28946584-28946753	chr16	28478384	468200	chr27:9168572-9168741	chr27	8699565	469007	chr27:31380345-31380512	chr27	31849126	468614
chr2:221699859-221699972	ENSG00000116106	222438922	738950	chr9:90194507-90194621	chr9	83022498	7172009	chr37:27137187-27137300	chr37	27805314	668014	chr6:10136884-10136997	chr6	10795190	658193	chr2:109561314-109561427	chr2	110405363	843936
chr16:51053227-51053411	ENSG00000103449	51185278	131867	chr19:30101287-30101470	chr19	34379537	4278067	chr2:64364344-64364528	chr2	64245467	118877	chr3:3876517-3876700	chr3	3978895	102195	chr18:19523266-19523450	chr18	19653740	130290
chr18:28822220-28822302	ENSG00000134760	28898052	75750	chr18:17703925-17704008	chr18	11807388	5896537	chr7:58252940-58253020	chr7	58193771	59169	chr8:52190241-52190321	chr8	52262813	72492	chr24:26209498-26209578	chr24	26133526	75972
chr3:110577417-110577589	ENSG00000177707	110788918	211329	chr11:60070729-60070900	chr11	62144557	2073657	chr33:15708256-15708428	chr33	15871172	162744	chr19:46527334-46527506	chr19	46336940	190394	chr1:56124740-56124912	chr1	56308185	183273
chr16:51014549-51014846	ENSG00000103449	51185278	170432	chr19:30131824-30132120	chr19	34379537	4247417	chr2:64400080-64400379	chr2	64245467	154613	chr3:3843650-3843950	chr3	3978895	134945	chr18:19484753-19485053	chr18	19653740	168687
chr2:221863353-221863417	ENSG00000116106	222438922	575505	chr9:90355934-90356009	chr9	83022498	7333436	chr37:27288504-27288568	chr37	27805314	516746	chr6:10289839-10289903	chr6	10795190	505287	chr2:109773493-109773557	chr2	110405363	631806
chr3:153690349-153690435	ENSG00000114790	153838792	148357	chr2:172032184-172032270	chr2	46226740	125805444	chr23:48171234-48171320	chr23	48290113	118793	chr16:85864699-85864784	chr16	85972751	107967	chr1:114591528-114591613	chr1	114432073	159455
chr2:161748338-161748392	ENSG00000136560	161993419	245027	chr13:86239081-86239133	chr3	-	-	chr36:6501703-6501757	chr36	6769333	267576	chr18:41469007-41469061	chr18	41680812	211751	chr2:35632073-35632125	chr2	35343041	289032
chr2:221864080-221864133	ENSG00000116106	222438922	574789	chr9:90356660-90356712	chr9	83022498	7334162	chr37:27289264-27289317	chr37	27805314	515997	chr6:10290583-10290636	chr6	10795190	504554	chr2:109774253-109774306	chr2	110405363	631057
chr2:220942020-220942191	ENSG00000124006	220436581	505439	chr9:89470470-89470668	chr9	82469082	7001388	chr37:26502440-26502614	chr37	26079752	422688	chr6:9486642-9486815	chr6	9063215	423427	chr2:108730137-108730310	chr2	108226115	504022
chr3:110628420-110628778	ENSG00000177707	110788918	160140	chr11:60120406-60120764	chr11	62144557	2023793	chr33:15757037-15757395	chr33	15871172	113777	chr19:46476861-46477219	chr19	46336940	139921	chr1:56183465-56183821	chr1	56308185	124364
chr3:16503045-16503296	ENSG00000154814	16306706	196339	chr9:11740155-11740397	chr16	-	-	chr23:26325561-26325811	chr23	26516070	190259	chr16:65132108-65132359	chr16	65326619	194260	chr1:155247392-155247644	chr1	155020422	226970
chr4:150886409-150886555	ENSG00000170390	150999426	112871	chr19:47729990-47730131	chr2	-	-	chr15:48004493-48004639	chr15	48119273	114634	chr2:83367662-83367808	chr2	83278289	89373	chr17:7874531-7874675	chr17	7742116	132415
chr18:52973411-52974153	ENSG00000166510	52626739	346672	chr18:64617854-64618588	chr18	67564699	2946111	chr1:20338165-20338906	chr1	20641290	302384	chr8:72974137-72974880	chr8	72654605	319532	chr24:55145614-55146355	chr24	54786447	359167
chr5:158016688-158016872	ENSG00000164330	158526769	509897	chr10:30103999-30104185	chr10	23523689	6580310	chr4:51863183-51863367	chr4	51378963	484220	chr14:20874802-20874986	chr14	20400279	474523	chr7:72284022-72284206	chr7	72804182	519976
chr7:112152936-112153151	ENSG00000181016	112120908	32028	chr4:39601388-39601662	chr6	-	-	chr14:52116845-52117061	chr14	52085924	30921	chr4:70325603-70325818	chr4	70283380	42223	chr4:55836074-55836289	chr4	55864841	28552
chr18:52967379-52967441	ENSG00000166510	52626739	340640	chr18:64624596-64624656	chr18	67564699	2940043	chr1:20345071-20345133	chr1	20641290	296157	chr8:72968146-72968208	chr8	72654605	313541	chr24:55139466-55139528	chr24	54786447	353019
chr6:39295397-39295597	ENSG00000095981	39290744	4653	chr9:11947364-11947559	chr15	-	-	chr12:8236996-8237199	chr12	8232029	4967	chr20:38858286-38858488	chr20	38853900	4386	chr23:13185349-13185553	chr23	13181359	3990
chr18:30109996-30110450	ENSG00000141441	30050447	59549	chr18:12170052-12170503	chr18	14769099	2598596	chr7:57175723-57176176	chr7	57295067	118891	chr8:53299096-53299550	chr8	53246251	52845	chr24:24937889-24938344	chr24	25005192	66848
chr5:50982046-50982218	ENSG00000016082	50678921	303125	chr2:69633766-69633942	chr2	66884387	2749379	chr4:63354660-63354838	chr4	63648648	293810	chr21:20006370-20006548	chr21	20306385	299837	chr20:27384324-27384499	chr20	27755504	371005
chr2:221285736-221286156	ENSG00000124006	220436581	849155	chr9:89786676-89787154	chr9	82469082	7317594	chr37:26781401-26781821	chr37	26079752	701649	chr6:9779584-9780003	chr6	9063215	716369	chr2:109094258-109094678	chr2	108226115	868143
chr16:50980732-50980812	ENSG00000103449	51185278	204466	chr19:30161589-30161669	chr19	34379537	4217868	chr2:64424615-64424693	chr2	64245467	179148	chr3:3812085-3812165	chr3	3978895	166730	chr18:19454699-19454778	chr18	19653740	198962
chr3:64216843-64216920	ENSG00000163636	64009658	207185	chr4:188898427-188898504	chr15	-	-	chr20:27008990-27009067	chr20	27206629	197562	chr16:25064019-25064096	chr16	25253011	188915	chr22:37314075-37314152	chr22	37538013	223861
chr2:220891084-220891365	ENSG00000124006	220436581	454503	chr9:89417043-89417324	chr9	82469082	6947961	chr37:26458486-26458768	chr37	26079752	378734	chr6:9441248-9441529	chr6	9063215	378033	chr2:108670592-108670864	chr2	108226115	444477
chr1:81579513-81579588	ENSG00000117114	81771845	192257	chr2:273401956-273402030	chr2	277602151	4200121	chr6:66383451-66383525	chr6	66216074	167377	chr5:82247519-82247594	chr5	81707657	539862	chr3:63563939-63564014	chr3	63355165	208774
chr13:23347729-23347844	ENSG00000102683	23755091	407247	chr15:43341942-43342057	chr15	45385876	2043819	chr25:15696996-15697111	chr25	15403190	293806	chr17:3433299-3433414	chr17	3857467	424053	chr12:35035415-35035527	chr12	34954970	80445
chr2:51973639-51973690	ENSG00000179915	51259674	713965	chr1:165285185-165285237	chr6	-	-	chr10:53189996-53190047	chr10	52670843	519153	chr15:47950092-47950142	chr15	48567697	617555	chr11:34030812-34030864	chr11	33353304	677508
chr3:16447313-16447419	ENSG00000154814	16306706	140607	chr9:11794346-11794453	chr16	-	-	chr23:26382666-26382776	chr23	26516070	133294	chr16:65187263-65187373	chr16	65326619	139246	chr1:155147039-155147149	chr1	155020422	126617
chr6:134994770-134994942	ENSG00000118514	135271260	276318	chr1:26090438-26090605	chr1	18065413	8025025	chr1:27500837-27501009	chr1	27694895	193886	chr10:80535438-80535608	chr10	80753675	218067	chr9:73751112-73751287	chr9	74002359	251072
chr18:62290963-62291026	ENSG00000166401	61637159	653804	chr4:162134128-162134191	chr13	-	-	chr1:12724655-12724718	chr1	13221421	496703	chr8:80832904-80832966	chr8	80313767	519137	chr24:12156958-12157021	chr24	12702951	545930
chr2:138227441-138227715	ENSG00000150540	138721590	493875	chr13:51791541-51791820	chr3	-	-	chr19:40147844-40148118	chr19	40656232	508114	chr18:21097403-21097677	chr18	21516160	418483	chr2:59991628-59991896	chr2	59417441	574187
chr11:79567734-79567822	ENSG00000149256	79151992	415742	chr1:159634206-159634293	chr1	167398961	7764668	chr21:19115095-19115183	chr21	19502511	387328	chr7:64830216-64830301	chr7	65193196	362895	chr29:16181481-16181570	chr29	16642421	460851
chr1:42322866-42322935	ENSG00000044012	42619092	296157	chr5:145927287-145927354	chr5	142499935	3427352	chr15:1319344-1319413	chr15	1096441	222903	chr2:16450805-16450874	chr2	16216973	233832	chr3:104915135-104915204	chr3	104612386	302749
chr18:30153380-30153435	ENSG00000141441	30050447	102933	chr18:12208510-12208573	chr18	14769099	2560526	chr7:57138993-57139048	chr7	57295067	156019	chr8:53340866-53340921	chr8	53246251	94615	chr24:24887827-24887881	chr24	25005192	117311
chr8:20656752-20656911	ENSG00000061337	20161474	495278	chr15:57382572-57382731	chr16	-	-	chr25:36308371-36308531	chr25	36804789	496258	chr2:49859147-49859306	chr2	49368485	490662	chr8:68520098-68520258	chr8	67867782	652316
chr2:17137082-17137350	ENSG00000197872	16847599	289483	chr6:44480641-44480906	chr6	50682247	6201341	chr17:12522324-12522594	chr17	12237822	284502	chr15:77749103-77749371	chr15	78023686	274315	chr11:81691260-81691529	chr11	81934105	242576
chr8:117697949-117698255	ENSG00000147679	117778742	80487	chr6:116827267-116827561	chr7	-	-	chr13:16140691-16140998	chr13	16213190	72192	chr9:60159487-60159793	chr9	60233194	73401	chr14:49793089-49793395	chr14	49714027	79062
chr5:50791491-50791859	ENSG00000016082	50678921	112570	chr2:69834958-69835315	chr2	66884387	2950571	chr4:63524055-63524423	chr4	63648648	124225	chr21:20188595-20188966	chr21	20306385	117419	chr20:27605834-27606206	chr20	27755504	149298
chr18:54160837-54161101	ENSG00000091157	54318574	157473	chr18:63523630-63523894	chr18	58326472	5197158	chr1:19282057-19282322	chr1	19157893	124164	chr8:73998738-73999004	chr8	74126513	127509	chr24:56328715-56328980	chr24	56467339	138359
chr14:75808501-75808590	ENSG00000170345	75745477	63024	chr6:118704301-118704390	chr6	116252608	2451693	chr8:48386352-48386442	chr8	48330849	55503	chr24:20728784-20728873	chr24	20677068	51716	chr10:86939975-86940063	chr10	86883738	56237
chr3:64212606-64212835	ENSG00000163636	64009658	202948	chr4:188902616-188902850	chr15	-	-	chr20:27013594-27013823	chr20	27206629	192806	chr16:25068260-25068487	chr16	25253011	184524	chr22:37318363-37318599	chr22	37538013	219414
chr2:229567844-229567906	ENSG00000153820	229046361	521483	chr9:91109412-91109474	chr9	88936524	2172888	chr25:41148839-41148902	chr25	40801987	346852	chr6:16548466-16548528	chr6	16185127	363339	chr2:117508169-117508230	chr2	117087259	420910
chr4:134207160-134207351	ENSG00000138650	134070470	136690	chr2:151030017-151030207	chr2	156481915	5451708	chr19:8616931-8617120	chr19	8732650	115530	chr2:96966287-96966475	chr2	97081807	115332	chr17:25355064-25355256	chr17	25495147	139891
chr2:138136765-138137015	ENSG00000150540	138721590	584575	chr13:51718214-51718474	chr3	-	-	chr19:40073905-40074163	chr19	40656232	582069	chr18:21019970-21020229	chr18	21516160	495931	chr2:60121266-60121532	chr2	59417441	703825
chr16:51126434-51126551	ENSG00000103449	51185278	58727	chr19:30043500-30043617	chr19	34379537	4335920	chr2:64299445-64299562	chr2	64245467	53978	chr3:3935164-3935281	chr3	3978895	43614	chr18:19596385-19596501	chr18	19653740	57239
chr5:157956535-157956803	ENSG00000164330	158526769	569966	chr10:30158763-30159030	chr10	23523689	6635074	chr4:51908904-51909170	chr4	51378963	529941	chr14:20920848-20921115	chr14	20400279	520569	chr7:72218277-72218545	chr7	72804182	585637
chr9:27408764-27408845	ENSG00000120160	27297137	111627	chr5:55072896-55072979	chr5	117826975	62753996	chr11:45534294-45534375	chr11	45431232	103062	chr23:45158021-45158112	chr23	45064606	93415	chr8:16867687-16867769	chr8	16979547	111778
chr2:221768036-221768149	ENSG00000116106	222438922	670773	chr9:90272834-90272950	chr9	83022498	7250336	chr37:27199844-27199955	chr37	27805314	605359	chr6:10198750-10198861	chr6	10795190	596329	chr2:109643029-109643140	chr2	110405363	762223
chr4:134164512-134164820	ENSG00000138650	134070470	94042	chr2:151083807-151084115	chr2	156481915	5397800	chr19:8640629-8640937	chr19	8732650	91713	chr2:96991913-96992221	chr2	97081807	89586	chr17:25384404-25384711	chr17	25495147	110436
chr9:104551998-104552168	ENSG00000198785	104500862	51136	chr5:72078684-72078850	chr5	69564696	2513988	chr11:58471178-58471347	chr11	58422278	48900	chr25:8113327-8113496	chr25	8054706	58621	chr8:93247640-93247809	chr8	93146121	101519
chr10:113104985-113105173	ENSG00000150594	112836790	268195	chr5:166395501-166395690	chr1	-	-	chr28:22580308-22580495	chr28	22367434	212874	chr1:20150547-20150735	chr1	20366618	215883	chr26:32100755-32101022	chr26	31870224	230531
chr6:114390297-114390399	ENSG00000196591	114332472	57825	chr20:42267090-42267188	chr20	44827687	2560499	chr12:70153551-70153653	chr12	70072758	80793	chr10:63051174-63051276	chr10	62976771	74403	chr9:36833314-36833416	chr9	36918295	84879
chr13:23285378-23285608	ENSG00000102683	23755091	469483	chr15:43294509-43294738	chr15	45385876	2091138	chr25:15747705-15747937	chr25	15403190	344515	chr17:3370270-3370502	chr17	3857467	486965	chr12:35073244-35073476	chr12	34954970	118274
chr6:114494137-114494390	ENSG00000196591	114332472	161665	chr20:42145260-42145503	chr20	44827687	2682184	chr12:70242750-70242996	chr12	70072758	169992	chr10:63145504-63145758	chr10	62976771	168733	chr9:36722263-36722515	chr9	36918295	195780
chr16:73734414-73734687	ENSG00000140836	73093597	640817	chr19:51056063-51056474	chr19	53739472	2682998	chr5:79252992-79253263	chr5	78610027	642965	chr3:20443573-20443843	chr3	21001311	557468	chr18:37667349-37667621	chr18	38186022	518401
chr12:61792442-61792541	ENSG00000135655	62654119	861578	chr16:83578730-83578828	chr7	-	-	chr10:4759020-4759119	chr10	5510755	751636	chr6:78039285-78039384	chr6	78737308	697924	chr5:52459566-52459665	chr5	51510115	949451
chr6:99237078-99237293	ENSG00000184486	99282580	45287	chr8:120331727-120331938	chr5	-	-	chr12:57063649-57063865	chr12	57103999	40134	chr10:50019699-50019909	chr10	50064530	44621	chr9:51644710-51644915	chr9	51603894	40816
chr3:16467768-16467982	ENSG00000154814	16306706	161062	chr9:11779787-11780004	chr16	-	-	chr23:26362929-26363143	chr23	26516070	152927	chr16:65168511-65168726	chr16	65326619	157893	chr1:155202715-155202930	chr1	155020422	182293
chr22:33834320-33834574	ENSG00000185666	33454358	379962	chr19:23694691-23694943	chr7	-	-	chr10:30275204-30275457	chr10	30510937	235480	chr28:31451642-31451897	chr28	31164574	287068	chr5:72299552-72299806	chr5	71926810	372742
chr2:220988934-220989018	ENSG00000124006	220436581	552353	chr9:89516495-89516585	chr9	82469082	7047413	chr37:26543686-26543800	chr37	26079752	463934	chr6:9529704-9529787	chr6	9063215	466489	chr2:108777750-108777831	chr2	108226115	551635
chr3:62478778-62479219	ENSG00000153266	62359999	118779	chr15:19641965-19642399	chr15	16854938	2787027	chr20:28584946-28585398	chr20	28704683	119285	chr16:26577783-26578229	chr16	26692919	114690	chr22:38946961-38947408	chr22	39068358	120950
chr4:143114450-143114745	ENSG00000164136	142557752	556698	chr19:40643079-40643370	chr19	34544021	6099058	chr19:1042285-1042577	chr19	1352457	309880	chr2:89581813-89582105	chr2	89935123	353018	chr17:15934516-15934808	chr17	16363886	429078
chr6:69132076-69132153	ENSG00000135298	69345259	213106	chr9:33120001-33120078	chr9	30832622	2287379	chr12:31098554-31098631	chr12	31337311	238680	chr20:60317360-60317437	chr20	60511786	194349	chr9:7205204-7205281	chr9	7506536	301255
chr9:83052096-83052185	ENSG00000106829	82186688	865408	chr5:91007926-91008012	chr1	-	-	chr1:78515081-78515170	chr1	79269883	754713	chr23:11583273-11583362	chr23	12316041	732679	chr8:56628363-56628452	chr8	55837380	790983
chr2:59303420-59303755	ENSG00000115392	58468507	834913	chr14:105836539-105836873	chr14	110369224	4532351	chr10:59377262-59377612	chr10	58632368	744894	chr15:41816684-41817020	chr15	42591277	774257	chr11:41669026-41669365	chr11	40744419	924607
chr5:43998527-43998853	ENSG00000070193	44389808	390955	chr2:67574765-67575095	chr2	70046330	2471235	chr4:66129286-66129620	chr4	65852049	277237	chr21:22809946-22810278	chr21	22528845	281101	chr20:30897647-30897979	chr20	30611286	286361
chr1:81753792-81753842	ENSG00000117114	81771845	18003	chr2:273237565-273237615	chr2	277602151	4364536	chr6:66236563-66236613	chr6	66216074	20489	chr5:82103247-82103297	chr5	81707657	395590	chr3:63378720-63378770	chr3	63355165	23555
chr2:84311135-84311278	ENSG00000163541	84687169	375891	chr4:168735614-168735758	chr4	165937928	2797686	chr17:40663002-40663139	chr17	40393146	269856	chr15:20146876-20147019	chr15	19834367	312509	chr11:50842091-50842241	chr11	50400444	441647
chr8:132108074-132108157	ENSG00000153317	131455906	652168	chr7:105589886-105589969	chr7	91990638	13599248	chr13:27980999-27981082	chr13	27430768	550231	chr9:72143630-72143713	chr9	71598463	545167	chr14:10791815-10791898	chr14	11327900	536002
chr3:191742713-191742909	ENSG00000152492	191046866	695847	chr11:79355656-79355858	chr11	83920149	4564291	chr34:23736511-23736710	chr34	23167476	569035	chr19:29214381-29214580	chr19	28671724	542657	chr1:75997462-75997661	chr1	76624452	626791
chr2:220990177-220990245	ENSG00000124006	220436581	553596	chr9:89517750-89517820	chr9	82469082	7048668	chr37:26545641-26545709	chr37	26079752	465889	chr6:9530953-9531021	chr6	9063215	467738	chr2:108778966-108779034	chr2	108226115	552851
chr13:23201164-23201214	ENSG00000102683	23755091	553877	chr15:43190318-43190369	chr15	45385876	2195507	chr25:15824905-15824955	chr25	15403190	421715	chr17:3296597-3296647	chr17	3857467	560820	chr12:35121224-35121274	chr12	34954970	166254
chr5:109690948-109691023	ENSG00000164209	110073837	382814	chr9:112460844-112460919	chr18	-	-	chr3:2007151-2007226	chr3	1719781	287370	chr14:61142910-61142985	chr14	60895084	247826	chr7:111965167-111965242	chr7	112332867	367625
chr2:145993968-145994070	ENSG00000169554	145282147	711821	chr3:39165676-39165776	chr3	35196121	3969555	chr19:47237779-47237881	chr19	46550583	687196	chr18:28115534-28115635	chr18	27461817	653717	chr2:51476259-51476361	chr2	52274862	798501
chr9:76519781-76520002	ENSG00000198963	77112281	592279	chr1:244436370-244436591	chr1	241354363	3082007	chr1:84144233-84144453	chr1	83666066	478167	chr23:17109206-17109426	chr23	17582328	472902	chr8:50350232-50350453	chr8	50874906	524453
chr8:36441032-36441199	ENSG00000215262	36641842	200643	chr16:67962058-67962224	chr16	70663273	2701049	chr16:28643691-28643860	chr16	28478384	165307	chr27:8871976-8872143	chr27	8699565	172411	chr27:31688076-31688242	chr27	31849126	160884
chr7:107801849-107801909	ENSG00000091128	107770801	31048	chr6:74433516-74433576	chr6	58706265	15727251	chr18:12463014-12463074	chr18	12517121	54047	chr4:8089808-8089868	chr4	8035156	54652	chr4:49541499-49541559	chr4	49479289	62210
chr2:112212214-112212315	ENSG00000153094	111876955	335259	chr3:129085871-129085974	chr3	126604489	2481382	chr17:35955509-35955609	chr17	35619812	335697	chr15:14553295-14553395	chr15	14233147	320148	chr11:855291-855390	chr11	1199790	344400
chr3:110100294-110100373	ENSG00000177707	110788918	688545	chr11:59629291-59629367	chr11	62144557	2515190	chr33:15359406-15359485	chr33	15871172	511687	chr19:46901019-46901098	chr19	46336940	564079	chr1:55630023-55630100	chr1	56308185	678085
chrX:23179087-23179255	ENSG00000184735	23018087	161000	chrX:42568685-42568853	chr8	-	-	chrX:18931172-18931335	chrX	18776371	154801	chrX:17548219-17548387	chrX	17468947	79272	chrX:127092636-127092804	chrX	127364927	272123
chr5:80794813-80795045	ENSG00000172497	80689998	104815	chr2:20514299-20514523	chr2	48096572	27582049	chr3:25831712-25831947	chr3	25928390	96443	chr14:84540259-84540494	chr14	84654451	113957	chr7:83782017-83782240	chr7	83658727	123290
chr5:102027041-102027145	ENSG00000145730	102089685	62540	chr9:104652223-104652324	chr9	110737325	6085001	chr3:8482817-8482920	chr3	8290489	192328	chr14:67531545-67531649	chr14	67474600	56945	chr7:104111008-104111111	chr7	104175550	64439
chr2:138304621-138304817	ENSG00000150540	138721590	416773	chr13:51887006-51887201	chr3	-	-	chr19:40211690-40211886	chr19	40656232	444346	chr18:21167259-21167455	chr18	21516160	348705	chr2:59895910-59896105	chr2	59417441	478469
chr3:110263644-110263950	ENSG00000177707	110788918	524968	chr11:59770284-59770589	chr11	62144557	2373968	chr33:15479334-15479639	chr33	15871172	391533	chr19:46772327-46772633	chr19	46336940	435387	chr1:55802453-55802755	chr1	56308185	505430
chr3:110192803-110192857	ENSG00000177707	110788918	596061	chr11:59717972-59718026	chr11	62144557	2426531	chr33:15435958-15436012	chr33	15871172	435160	chr19:46818125-46818178	chr19	46336940	481185	chr1:55742275-55742329	chr1	56308185	565856
chr6:14305754-14305805	ENSG00000112149	14117872	187882	chr17:22806212-22806264	chr17	26364943	3558679	chr35:13656004-13656056	chr35	13489273	166731	chr20:13781669-13781721	chr20	13617586	164083	chr23:42190441-42190493	chr23	42354680	164187
chr1:81499828-81500040	ENSG00000117114	81771845	271805	chr2:273517485-273517695	chr2	277602151	4084456	chr6:66451610-66451822	chr6	66216074	235536	chr5:82309461-82309670	chr5	81707657	601804	chr3:63640199-63640402	chr3	63355165	285034
chr15:68809759-68809893	ENSG00000137809	68724501	85258	chr8:71132172-71132308	chr8	67299007	3833165	chr30:32507111-32507248	chr30	32405661	101450	chr1:124376305-124376439	chr1	124447421	70982	chr10:15334646-15334785	chr10	15236778	97868
chr6:114390128-114390261	ENSG00000196591	114332472	57656	chr20:42267224-42267357	chr20	44827687	2560330	chr12:70153382-70153515	chr12	70072758	80624	chr10:63051006-63051138	chr10	62976771	74235	chr9:36833452-36833581	chr9	36918295	84714
chr2:221184516-221184806	ENSG00000124006	220436581	747935	chr9:89705907-89706216	chr9	82469082	7236825	chr37:26715333-26715635	chr37	26079752	635581	chr6:9708497-9708797	chr6	9063215	645282	chr2:109003380-109003683	chr2	108226115	777265
chr9:83017362-83018274	ENSG00000106829	82186688	830674	chr5:90979665-90980572	chr1	-	-	chr1:78486778-78487692	chr1	79269883	782191	chr23:11610358-11611276	chr23	12316041	704765	chr8:56603848-56604751	chr8	55837380	766468
chr18:52795667-52795748	ENSG00000166510	52626739	168928	chr18:64781471-64781551	chr18	67564699	2783148	chr1:20491247-20491328	chr1	20641290	149962	chr8:72818502-72818583	chr8	72654605	163897	chr24:54967556-54967637	chr24	54786447	181109
chr2:59402725-59403167	ENSG00000115392	58468507	934218	chr14:105749844-105750285	chr14	110369224	4618939	chr10:59446270-59446712	chr10	58632368	813902	chr15:41747760-41748201	chr15	42591277	843076	chr11:41742822-41743264	chr11	40744419	998403
chr6:14320647-14321053	ENSG00000112149	14117872	202775	chr17:22820453-22820859	chr17	26364943	3544084	chr35:13669844-13670254	chr35	13489273	180571	chr20:13795903-13796312	chr20	13617586	178317	chr23:42173106-42173515	chr23	42354680	181165
chr2:145816832-145816948	ENSG00000169554	145282147	534685	chr3:38985937-38986051	chr3	35196121	3789816	chr19:47060648-47060763	chr19	46550583	510065	chr18:27949061-27949176	chr18	27461817	487244	chr2:51683770-51683885	chr2	52274862	590977
chrX:130755722-130755971	ENSG00000171054	130677950	77772	chrX:137675168-137675415	chr1	-	-	chrX:102720464-102720707	chrX	102640011	80453	chrX:104678593-104678840	chrX	104605998	72595	chrX:15542711-15542960	chrX	15453981	88730
chr1:221378963-221379036	ENSG00000136630	221051699	327264	chr13:109324838-109324909	chr13	107320943	2003895	chr38:15823557-15823630	chr38	15538534	285023	chr30:11310940-11311013	chr30	11006987	303953	chr16:25409182-25409255	chr16	25059266	349916
chr11:79370300-79370464	ENSG00000149256	79151992	218308	chr1:159830832-159830994	chr1	167398961	7567967	chr21:19286631-19286794	chr21	19502511	215717	chr7:64999522-64999685	chr7	65193196	193511	chr29:16402608-16402769	chr29	16642421	239652
chr8:20752827-20753108	ENSG00000061337	20161474	591353	chr15:57270786-57271067	chr16	-	-	chr25:36217854-36218135	chr25	36804789	586654	chr2:49955646-49955927	chr2	49368485	587161	chr8:68635638-68635919	chr8	67867782	767856
chr9:83080451-83080777	ENSG00000106829	82186688	893763	chr5:91048960-91049270	chr1	-	-	chr1:78538340-78538667	chr1	79269883	731216	chr23:11553786-11554115	chr23	12316041	761926	chr8:56666233-56666560	chr8	55837380	828853
chr8:20711182-20711451	ENSG00000061337	20161474	549708	chr15:57331833-57332093	chr16	-	-	chr25:36257144-36257412	chr25	36804789	547377	chr2:49911924-49912191	chr2	49368485	543439	chr8:68582664-68582933	chr8	67867782	714882
chr18:52732100-52732159	ENSG00000166510	52626739	105361	chr18:64845481-64845562	chr18	67564699	2719137	chr1:20551330-20551389	chr1	20641290	89901	chr8:72755596-72755654	chr8	72654605	100991	chr24:54893006-54893065	chr24	54786447	106559
chr4:23734262-23734346	ENSG00000109606	24586173	851827	chr14:63345381-63345480	chr14	61248770	2096611	chr3:86336088-86336172	chr3	85549939	786149	chr3:100929905-100929989	chr3	100177256	752649	chr6:44774806-44774888	chr6	45683587	908699
chr3:153571016-153571156	ENSG00000114790	153838792	267636	chr2:171920761-171920900	chr2	46226740	125694021	chr23:48076977-48077115	chr23	48290113	212998	chr16:85786385-85786522	chr16	85972751	186229	chr1:114697349-114697487	chr1	114432073	265276
chr8:20562946-20563030	ENSG00000061337	20161474	401472	chr15:57488238-57488321	chr16	-	-	chr25:36396953-36397037	chr25	36804789	407752	chr2:49750005-49750089	chr2	49368485	381520	chr8:68397089-68397173	chr8	67867782	529307
chr2:127011318-127011508	ENSG00000136732	127413509	402001	chr13:28414784-28414974	chr18	-	-	chr19:24389601-24389791	chr19	23988748	400853	chr18:4621599-4621789	chr18	4245068	376531	chr2:78824427-78824617	chr2	79255684	431067
chr3:148476132-148476400	ENSG00000153002	148508889	32489	chr17:37204480-37204762	chr2	-	-	chr23:43629572-43629841	chr23	43679900	50059	chr16:81604071-81604340	chr16	81646593	42253	chr1:120386200-120386469	chr1	120315818	70382
chr18:54209138-54209531	ENSG00000091157	54318574	109043	chr18:63480018-63480412	chr18	58326472	5153546	chr1:19248538-19248939	chr1	19157893	90645	chr8:74033244-74033645	chr8	74126513	92868	chr24:56362946-56363338	chr24	56467339	104001
chr16:73712540-73712761	ENSG00000140836	73093597	618943	chr19:51070352-51070578	chr19	53739472	2668894	chr5:79237255-79237476	chr5	78610027	627228	chr3:20460442-20460663	chr3	21001311	540648	chr18:37685351-37685572	chr18	38186022	500450
chr1:235722153-235722424	ENSG00000162885	235667781	54372	chr17:91933633-91933901	chr17	51764786	40168847	chr4:4381642-4381913	chr4	4434911	52998	chr1:75825549-75825820	chr1	75859291	33471	chr28:8354244-8354530	chr28	8297594	56650
chr8:20359301-20359359	ENSG00000061337	20161474	197827	chr15:57779778-57779836	chr16	-	-	chr25:36572068-36572126	chr25	36804789	232663	chr2:49571433-49571491	chr2	49368485	202948	chr8:68168848-68168906	chr8	67867782	301066
chr2:220866445-220866659	ENSG00000124006	220436581	429864	chr9:89379469-89379686	chr9	82469082	6910387	chr37:26430568-26430919	chr37	26079752	350816	chr6:9418541-9418755	chr6	9063215	355326	chr2:108640933-108641148	chr2	108226115	414818
chr2:221859273-221859771	ENSG00000116106	222438922	579151	chr9:90351835-90352335	chr9	83022498	7329337	chr37:27284960-27285461	chr37	27805314	519853	chr6:10285420-10285918	chr6	10795190	509272	chr2:109769401-109769901	chr2	110405363	635462
chr2:59273721-59274047	ENSG00000115392	58468507	805214	chr14:105859524-105859853	chr14	110369224	4509371	chr10:59348737-59349089	chr10	58632368	716369	chr15:41842826-41843152	chr15	42591277	748125	chr11:41643653-41643988	chr11	40744419	899234
chr6:14642090-14642315	ENSG00000112149	14117872	524218	chr17:23097172-23097402	chr17	26364943	3267541	chr35:13960222-13960450	chr35	13489273	470949	chr20:14106256-14106485	chr20	13617586	488670	chr23:41898184-41898412	chr23	42354680	456268
chr4:141147489-141147678	ENSG00000153130	141178440	30762	chr2:161030813-161031004	chr19	-	-	chr19:2594317-2594506	chr19	2566489	27828	chr2:91222317-91222506	chr2	91194812	27505	chr17:17791871-17792059	chr17	17757670	34201
chr2:221949944-221950307	ENSG00000116106	222438922	488615	chr9:90436806-90437168	chr9	83022498	7414308	chr37:27362852-27363218	chr37	27805314	442096	chr6:10357880-10358248	chr6	10795190	436942	chr2:109867355-109867712	chr2	110405363	537651
chr2:220984972-220985061	ENSG00000124006	220436581	548391	chr9:89511871-89511960	chr9	82469082	7042789	chr37:26539024-26539113	chr37	26079752	459272	chr6:9524347-9524436	chr6	9063215	461132	chr2:108773376-108773465	chr2	108226115	547261
chr2:84219023-84219282	ENSG00000163541	84687169	467887	chr4:168836395-168836644	chr4	165937928	2898467	chr17:40739141-40739401	chr17	40393146	345995	chr15:20226295-20226556	chr15	19834367	391928	chr11:50966145-50966402	chr11	50400444	565701
chr5:51761505-51762255	ENSG00000213949	52083730	321475	chr2:66146096-66146847	chr2	71763917	5617070	chr4:62720787-62721543	chr4	62455624	265163	chr21:19401300-19402048	chr21	19153982	247318	chr20:26608360-26609102	chr20	26293313	315047
chr2:145866856-145867161	ENSG00000169554	145282147	584709	chr3:39036819-39037125	chr3	35196121	3840698	chr19:47107125-47107437	chr19	46550583	556542	chr18:27994310-27994618	chr18	27461817	532493	chr2:51621985-51622294	chr2	52274862	652568
chr2:66362293-66362390	ENSG00000143995	66660584	298194	chr2:49968673-49968946	chr14	-	-	chr10:65496921-65497018	chr10	65765038	268020	chr15:35801471-35801568	chr15	35544716	256755	chr11:64463291-64463388	chr11	64770130	306742
chr1:81521130-81521192	ENSG00000117114	81771845	250653	chr2:273489158-273489220	chr2	277602151	4112931	chr6:66431558-66431618	chr6	66216074	215484	chr5:82290542-82290604	chr5	81707657	582885	chr3:63611578-63611640	chr3	63355165	256413
chr8:20429926-20430006	ENSG00000061337	20161474	268452	chr15:57712945-57713025	chr16	-	-	chr25:36506167-36506247	chr25	36804789	298542	chr2:49635729-49635810	chr2	49368485	267244	chr8:68247553-68247633	chr8	67867782	379771
chr1:81719091-81719245	ENSG00000117114	81771845	52600	chr2:273275706-273275860	chr2	277602151	4326291	chr6:66268073-66268228	chr6	66216074	51999	chr5:82136443-82136598	chr5	81707657	428786	chr3:63431766-63431921	chr3	63355165	76601
chr2:221284587-221284750	ENSG00000124006	220436581	848006	chr9:89785511-89785674	chr9	82469082	7316429	chr37:26780231-26780392	chr37	26079752	700479	chr6:9778441-9778604	chr6	9063215	715226	chr2:109092833-109092996	chr2	108226115	866718
chr5:117489549-117489628	ENSG00000169570	118324240	834612	chr18:43470970-43471050	chr14	-	-	chr11:7713497-7713576	chr11	8346507	632931	chr14:54755899-54755978	chr14	54153274	602625	chr7:36925964-36926046	chr7	36230534	695430
chr18:52906865-52906984	ENSG00000166510	52626739	280126	chr18:64681915-64682034	chr18	67564699	2882665	chr1:20405653-20405772	chr1	20641290	235518	chr8:72909725-72909844	chr8	72654605	255120	chr24:55068654-55068774	chr24	54786447	282207
chr2:112168632-112168701	ENSG00000153094	111876955	291677	chr3:129123446-129123512	chr3	126604489	2518957	chr17:35913645-35913713	chr17	35619812	293833	chr15:14510361-14510440	chr15	14233147	277214	chr11:901101-901169	chr11	1199790	298621
chr18:58472434-58472638	ENSG00000166603	58040001	432433	chr13:28931063-28931264	chr18	-	-	chr1:15853861-15854065	chr1	16131567	277502	chr8:77473502-77473706	chr8	77171048	302454	chr24:59927709-59927914	chr24	59672094	255615
chr2:59219880-59219954	ENSG00000115392	58468507	751373	chr14:105912334-105912409	chr14	110369224	4456815	chr10:59297191-59297266	chr10	58632368	664823	chr15:41892525-41892601	chr15	42591277	698676	chr11:41568582-41568657	chr11	40744419	824163
chr5:158018188-158018830	ENSG00000164330	158526769	507939	chr10:30102086-30102718	chr10	23523689	6578397	chr4:51861220-51861867	chr4	51378963	482257	chr14:20872860-20873497	chr14	20400279	472581	chr7:72285507-72286153	chr7	72804182	518029
chr4:150365642-150365800	ENSG00000170390	150999426	633626	chr19:46700884-46701047	chr2	-	-	chr15:47572952-47573115	chr15	48119273	546158	chr2:83796115-83796275	chr2	83278289	517826	chr17:8398763-8398918	chr17	7742116	656647
chr5:102000587-102000931	ENSG00000145730	102089685	88754	chr9:104636117-104636463	chr9	110737325	6100862	chr3:8495903-8496245	chr3	8290489	205414	chr14:67544673-67545017	chr14	67474600	70073	chr7:104095425-104095769	chr7	104175550	79781
chr7:42520068-42520189	ENSG00000106571	42277469	242599	chr17:53965622-53965742	chr17	50629477	3336145	chr18:7584876-7584998	chr18	7800858	215860	chr4:13591884-13592006	chr4	13366275	225609	chr4:79190743-79190865	chr4	79444274	253409
chr4:150384350-150384541	ENSG00000170390	150999426	614885	chr19:46718668-46718864	chr2	-	-	chr15:47582687-47582878	chr15	48119273	536395	chr2:83785681-83785872	chr2	83278289	507392	chr17:8381815-8382006	chr17	7742116	639699
chr16:73529772-73530004	ENSG00000140836	73093597	436175	chr19:51228000-51228237	chr19	53739472	2511235	chr5:79069721-79069953	chr5	78610027	459694	chr3:20623387-20623619	chr3	21001311	377692	chr18:37858426-37858658	chr18	38186022	327364
chr2:51847024-51847204	ENSG00000179915	51259674	587350	chr6:27450110-27450318	chr6	25149152	2300958	chr10:53069725-53069909	chr10	52670843	398882	chr15:48065145-48065325	chr15	48567697	502372	chr11:34163536-34163727	chr11	33353304	810232
chrX:23044182-23044258	ENSG00000184735	23018087	26095	chrX:42328010-42328086	chr8	-	-	chrX:18797924-18798000	chrX	18776371	21553	chrX:17366776-17366852	chrX	17345727	21049	chrX:127297173-127297249	chrX	127364927	67678
chr8:36308319-36308374	ENSG00000215262	36641842	333468	chr16:67819101-67819155	chr16	70663273	2844118	chr16:28743813-28743868	chr16	28478384	265429	chr27:8965809-8965864	chr27	8699565	266244	chr27:31566248-31567500	chr27	31849126	281626
chr3:148006930-148007517	ENSG00000144891	148415571	408054	chr8:97258983-97259570	chr2	-	-	chr23:43257753-43258340	chr23	43613937	355597	chr16:81236977-81237564	chr16	81548815	311251	chr1:120858439-120859026	chr1	120445395	413044
chr3:184374643-184374992	ENSG00000177383	184429836	54844	chr11:86532579-86532935	chr1	-	-	chr34:17504234-17504583	chr34	17544950	40367	chr19:22990938-22991291	chr19	23030761	39470	chr1:83132893-83133253	chr1	83090425	42468
chrX:22683589-22683910	ENSG00000184735	23018087	334177	chrX:41738342-41738661	chr8	-	-	chrX:18450924-18451245	chrX	18776371	325126	chrX:17075616-17075937	chrX	17345722	269785	chrX:127739650-127739971	chrX	127364927	374723
chr7:115027082-115028123	ENSG00000135272	114562209	464873	chr4:44025463-44026498	chr4	41790494	2234969	chr14:54475664-54476717	chr14	54063568	412096	chr4:72637523-72638564	chr4	72206834	430689	chr4:53368340-53369380	chr4	53854749	485369
chr12:99728102-99728340	ENSG00000180219	100041531	313191	chr7:31200113-31200347	chr13	-	-	chr15:38637669-38637907	chr15	38890120	252213	chr28:23662594-23662832	chr28	23899793	236961	chr5:63834249-63834487	chr5	64094901	260414
chr12:99549349-99549458	ENSG00000180219	100041531	492073	chr7:31358986-31359095	chr13	-	-	chr15:38500991-38501100	chr15	38890120	389020	chr28:23517865-23517974	chr28	23899793	381819	chr5:63659371-63659480	chr5	64094901	435421
chr18:52968148-52968223	ENSG00000166510	52626739	341409	chr18:64623785-64623860	chr18	67564699	2940839	chr1:20344273-20344348	chr1	20641290	296942	chr8:72968921-72968996	chr8	72654605	314316	chr24:55140286-55140362	chr24	54786447	353839
chr9:106557177-106557275	ENSG00000136824	106856541	299266	chr5:69884929-69885025	chr5	73151949	3266924	chr11:59846318-59846417	chr11	60091674	245257	chr25:9783229-9783327	chr25	10059214	275887	chr8:95023718-95023816	chr8	95362953	339137
chr16:73523120-73523416	ENSG00000140836	73093597	429523	chr19:51235805-51236093	chr19	53739472	2503379	chr5:79063477-79063773	chr5	78610027	453450	chr3:20629994-20630289	chr3	21001311	371022	chr18:37864459-37864755	chr18	38186022	321267
chr5:102665583-102665669	ENSG00000181751	102594403	71180	chr9:105025393-105025480	chr9	110878884	5853404	chr3:7913513-7913599	chr3	7967907	54308	chr14:66971104-66971191	chr14	67030817	59626	chr7:104770116-104770202	chr7	104692816	77300
chr2:146087546-146088164	ENSG00000169554	145282147	805399	chr3:39350360-39350983	chr3	35196121	4154239	chr19:47349973-47350596	chr19	46550583	799390	chr18:28208366-28208988	chr18	27461817	746549	chr2:51296621-51297244	chr2	52274862	977618
chr7:113032699-113032806	ENSG00000164604	112727833	304866	chr4:40242500-40242606	chr4	43719803	3477197	chr14:52837121-52837228	chr14	52573892	263229	chr4:71019303-71019410	chr4	70763801	255502	chr4:55358163-55358270	chr4	55640695	282425
chr4:46940278-46940335	ENSG00000170516	46911252	29026	chr14:39025961-39026017	chr10	-	-	chr13:42906754-42906811	chr13	42740224	166530	chr3:81839017-81839074	chr3	81994410	155336	chr6:67157186-67157241	chr6	67118236	38950
chr9:76446319-76446369	ENSG00000198963	77112281	665912	chr1:244554392-244554441	chr1	241354363	3200029	chr1:84203587-84203637	chr1	83666066	537521	chr23:17053867-17053917	chr23	17582328	528411	chr8:50267361-50267411	chr8	50874906	607495
chr12:67402197-67402249	ENSG00000155974	67197966	204231	chr7:62431953-62432005	chr7	64890312	2458307	chr10:9394713-9394765	chr10	9063901	330812	chr6:82361057-82361109	chr6	82051586	309471	chr5:47010225-47010277	chr5	47393104	382827
chrX:76397747-76397798	ENSG00000196468	76709648	311850	chrX:77320425-77320476	chrX	55910572	21409853	chrX:59558025-59558076	chrX	59739397	181321	chrX:57333707-57333758	chrX	57443444	109686	chrX:80133004-80133054	chrX	79954814	178190
chr2:221942069-221942163	ENSG00000116106	222438922	496759	chr9:90429854-90429948	chr9	83022498	7407356	chr37:27356074-27356167	chr37	27805314	449147	chr6:10350445-10350538	chr6	10795190	444652	chr2:109855775-109855868	chr2	110405363	549495
chr7:42519246-42519633	ENSG00000106571	42277469	241777	chr17:53966169-53966560	chr17	50629477	3336692	chr18:7585444-7585832	chr18	7800858	215026	chr4:13591054-13591443	chr4	13366275	224779	chr4:79191331-79191721	chr4	79444274	252553
chrX:113465838-113465906	ENSG00000147246	113818551	352645	chrX:36698918-36698985	chrX	118225792	81526807	chrX:87041390-87041458	chrX	87342807	301349	chrX:90389159-90389227	chrX	90649497	260270	chrX:67490692-67490760	chrX	67739107	248347
chr18:54161158-54161271	ENSG00000091157	54318574	157303	chr18:63523460-63523573	chr18	58326472	5196988	chr1:19281893-19282004	chr1	19157893	124000	chr8:73999061-73999174	chr8	74126513	127339	chr24:56329037-56329149	chr24	56467339	138190
chr2:124270744-124270892	ENSG00000155052	124782864	511972	chr13:16811759-16811907	chr13	20631641	3819734	chr19:26832777-26832924	chr19	26397894	434883	chr18:7089493-7089641	chr18	6667430	422063	chr2:75804533-75804678	chr2	76308191	503513
chr3:62455605-62455867	ENSG00000153266	62359999	95606	chr15:19664224-19664485	chr15	16854938	2809286	chr20:28607229-28607491	chr20	28704683	97192	chr16:26600990-26601252	chr16	26692919	91667	chr22:38969325-38969589	chr22	39068358	98769
chr2:221896294-221896356	ENSG00000116106	222438922	542566	chr9:90384017-90384079	chr9	83022498	7361519	chr37:27319646-27319708	chr37	27805314	485606	chr6:10316983-10317045	chr6	10795190	478145	chr2:109807512-109807574	chr2	110405363	597789
chr9:7566714-7566864	ENSG00000178445	6645650	921064	chr5:95858465-95858615	chr1	-	-	chr11:28430779-28430928	chr11	27584474	846305	chr23:28607041-28607608	chr23	27814482	792559	chr8:37505707-37505858	chr8	38468512	962654
chr2:108388766-108388846	ENSG00000196862	108443388	54542	chr9:4532670-4532749	chr20	-	-	chr10:36017381-36017461	chr10	35387807	629574	chr15:2212674-2212754	chr15	1444589	768085	chr11:44958419-44958499	chr11	44570866	387553
chr8:36482911-36483115	ENSG00000215262	36641842	158727	chr16:67997987-67998188	chr16	70663273	2665085	chr16:28612491-28612697	chr16	28478384	134107	chr27:8836273-8836476	chr27	8699565	136708	chr27:31728178-31728382	chr27	31849126	120744
chr8:36333452-36333545	ENSG00000215262	36641842	308297	chr16:67832412-67832505	chr16	70663273	2830768	chr16:28730030-28730123	chr16	28478384	251646	chr27:8947320-8947413	chr27	8699565	247755	chr27:31586200-31586293	chr27	31849126	262833
chr2:221735282-221735366	ENSG00000116106	222438922	703556	chr9:90231982-90232066	chr9	83022498	7209484	chr37:27167451-27167535	chr37	27805314	637779	chr6:10169258-10169342	chr6	10795190	625848	chr2:109605312-109605396	chr2	110405363	799967
chr8:24520082-24520150	ENSG00000069206	24298443	221639	chr15:46463953-46464019	chr15	53190170	6726151	chr25:32781928-32781996	chr25	33007967	225971	chr2:53391546-53391614	chr2	53159180	232366	chr8:72785334-72785402	chr8	72552675	232659
chr12:67408994-67409219	ENSG00000155974	67197966	211028	chr7:62421902-62422127	chr7	64890312	2468185	chr10:9402194-9402419	chr10	9063901	338293	chr6:82369960-82370185	chr6	82051586	318374	chr5:47002726-47002952	chr5	47393104	390152
chr2:145904337-145904555	ENSG00000169554	145282147	622190	chr3:39089277-39089487	chr3	35196121	3893156	chr19:47153912-47154131	chr19	46550583	603329	chr18:28040725-28040944	chr18	27461817	578908	chr2:51574168-51574387	chr2	52274862	700475
chr4:130816832-130816905	ENSG00000151466	130014764	802068	chr2:153244674-153244746	chr2	148271696	4972978	chr19:11224618-11224691	chr19	12001306	776615	chr2:99493487-99493560	chr2	100183877	690317	chr17:28189598-28189671	chr17	29126352	936681
[truncated: 1,019 more rows]

## Sheet: syn_set
Syn_set
Hg19				Rn5				Canfam3				EquCab2				Bostau6
[truncated: 51,435 more rows]

## Sheet: LOP_repeats
Human genomic attributes around LOP CNEs					Rat genomic attributes around LOP CNEs					Dog genomic attributes around LOP CNEs					Cow genomic attributes around LOP CNEs					Horse genomic attributes around LOP CNEs
[truncated: 51 more rows]

[truncated: 19 more sheets: syn_repeats, GO, MPO, Bgee, TSEA, H3K4me1, GWAS, motifs, developing_brain, developing_heart, rn5_to_rn6_comparison, rodent-LOP-1, rodent-LOP-2, rodent-LOP-1, exp, rodent-LOP-2, exp, Rat_LOP, exp, Mouse_LOP, exp, rodent-LOP-1, H3K4me1, rodent-LOP-2, H3K4me1]
